# Supplementary material
Source: publisher figshare collection journal article supplement (https://acs.figshare.com/ndownloader/files/4782844)
Supplement: Supplementary file 1 [file 4782844]

data_1a

_audit_creation_method            SHELXL-97
_chemical_name_systematic
;
hexyl bromo calixarene, acetonitrile
;
_chemical_name_common             ?
_chemical_melting_point           ?
_chemical_formula_moiety
;
(C52 H60 Br4 O8 ) (C2 H3 N1)
;
_chemical_formula_sum
 'C54 H63 Br4 N O8'
_chemical_formula_weight          1173.69

loop_
 _atom_type_symbol
 _atom_type_description
 _atom_type_scat_dispersion_real
 _atom_type_scat_dispersion_imag
 _atom_type_scat_source
 'C'  'C'   0.0033   0.0016
 'International Tables Vol C Tables 4.2.6.8 and 6.1.1.4'
 'H'  'H'   0.0000   0.0000
 'International Tables Vol C Tables 4.2.6.8 and 6.1.1.4'
 'N'  'N'   0.0061   0.0033
 'International Tables Vol C Tables 4.2.6.8 and 6.1.1.4'
 'O'  'O'   0.0106   0.0060
 'International Tables Vol C Tables 4.2.6.8 and 6.1.1.4'
 'Br'  'Br'  -0.2901   2.4595
 'International Tables Vol C Tables 4.2.6.8 and 6.1.1.4'

_symmetry_cell_setting            Triclinic
_symmetry_space_group_name_H-M    P-1

loop_
 _symmetry_equiv_pos_as_xyz
 'x, y, z'
 '-x, -y, -z'

_cell_length_a                    10.7767(7)
_cell_length_b                    11.6740(7)
_cell_length_c                    20.8192(13)
_cell_angle_alpha                 80.392(4)
_cell_angle_beta                  86.826(4)
_cell_angle_gamma                 76.503(3)
_cell_volume                      2510.8(3)
_cell_formula_units_Z             2
_cell_measurement_temperature     173(2)
_cell_measurement_reflns_used     4132
_cell_measurement_theta_min       2.20
_cell_measurement_theta_max       27.95

_exptl_crystal_description        prism
_exptl_crystal_colour             colorless
_exptl_crystal_size_max           0.30
_exptl_crystal_size_mid           0.25
_exptl_crystal_size_min           0.20
_exptl_crystal_density_meas       ?
_exptl_crystal_density_diffrn     1.552
_exptl_crystal_density_method     'not measured'
_exptl_crystal_F_000              1196
_exptl_absorpt_coefficient_mu     3.261
_exptl_absorpt_correction_type    multi-scan
_exptl_absorpt_correction_T_min   0.842
_exptl_absorpt_correction_T_max   1.000
_exptl_absorpt_process_details    'SADABS'

_exptl_special_details
;
 ?
;

_diffrn_ambient_temperature       173(2)
_diffrn_radiation_wavelength      0.71073
_diffrn_radiation_type            MoK\a
_diffrn_radiation_source          'fine-focus sealed tube'
_diffrn_radiation_monochromator   graphite
_diffrn_measurement_device_type   'Bruker P4'
_diffrn_measurement_method        '\w scans'
_diffrn_detector_area_resol_mean  ?
_diffrn_standards_number          ?
_diffrn_standards_interval_count  ?
_diffrn_standards_interval_time   ?
_diffrn_standards_decay_%         ?
_diffrn_reflns_number             18907
_diffrn_reflns_av_R_equivalents   0.0287
_diffrn_reflns_av_sigmaI/netI     0.0442
_diffrn_reflns_limit_h_min        -12
_diffrn_reflns_limit_h_max        13
_diffrn_reflns_limit_k_min        -15
_diffrn_reflns_limit_k_max        15
_diffrn_reflns_limit_l_min        -27
_diffrn_reflns_limit_l_max        27
_diffrn_reflns_theta_min          1.82
_diffrn_reflns_theta_max          28.28
_reflns_number_total              11246
_reflns_number_gt                 9466
_reflns_threshold_expression      >2sigma(I)

_computing_data_collection        'Bruker XSCANS'
_computing_cell_refinement        'Bruker XSCANS'
_computing_data_reduction         'Bruker SHELXTL'
_computing_structure_solution     'SHELXS-97 (Sheldrick, 1990)'
_computing_structure_refinement   'SHELXL-97 (Sheldrick, 1997)'
_computing_molecular_graphics     'Bruker SHELXTL'
_computing_publication_material   'Bruker SHELXTL'

_refine_special_details
;
 Refinement of F^2^ against ALL reflections.  The weighted R-factor wR and
 goodness of fit S are based on F^2^, conventional R-factors R are based
 on F, with F set to zero for negative F^2^. The threshold expression of
 F^2^ > 2sigma(F^2^) is used only for calculating R-factors(gt) etc. and is
 not relevant to the choice of reflections for refinement.  R-factors based
 on F^2^ are statistically about twice as large as those based on F, and R-
 factors based on ALL data will be even larger.
;

_refine_ls_structure_factor_coef  Fsqd
_refine_ls_matrix_type            full
_refine_ls_weighting_scheme       calc
_refine_ls_weighting_details
 'calc w=1/[\s^2^(Fo^2^)+(0.0400P)^2^+0.8000P] where P=(Fo^2^+2Fc^2^)/3'
_atom_sites_solution_primary      direct
_atom_sites_solution_secondary    difmap
_atom_sites_solution_hydrogens    geom
_refine_ls_hydrogen_treatment     mixed
_refine_ls_extinction_method      SHELXL
_refine_ls_extinction_coef        0.0131(4)
_refine_ls_extinction_expression
 'Fc^*^=kFc[1+0.001xFc^2^\l^3^/sin(2\q)]^-1/4^'
_refine_ls_number_reflns          11246
_refine_ls_number_parameters      605
_refine_ls_number_restraints      0
_refine_ls_R_factor_all           0.0424
_refine_ls_R_factor_gt            0.0330
_refine_ls_wR_factor_ref          0.0877
_refine_ls_wR_factor_gt           0.0823
_refine_ls_goodness_of_fit_ref    1.097
_refine_ls_restrained_S_all       1.097
_refine_ls_shift/su_max           0.002
_refine_ls_shift/su_mean          0.000

loop_
 _atom_site_label
 _atom_site_type_symbol
 _atom_site_fract_x
 _atom_site_fract_y
 _atom_site_fract_z
 _atom_site_U_iso_or_equiv
 _atom_site_adp_type
 _atom_site_occupancy
 _atom_site_symmetry_multiplicity
 _atom_site_calc_flag
 _atom_site_refinement_flags
 _atom_site_disorder_assembly
 _atom_site_disorder_group
N1S N 0.2915(3) 1.3342(3) 0.24198(13) 0.0462(7) Uani 1 1 d . . .
C1S C 0.2253(3) 1.4261(3) 0.23713(13) 0.0378(7) Uani 1 1 d . . .
C2S C 0.1404(3) 1.5441(3) 0.23067(16) 0.0489(8) Uani 1 1 d . . .
H1A H 0.1910 1.6045 0.2280 0.073 Uiso 1 1 calc R . .
H1A H 0.0826 1.5490 0.2686 0.073 Uiso 1 1 calc R . .
H1A H 0.0906 1.5583 0.1910 0.073 Uiso 1 1 calc R . .
Br1 Br 0.78099(2) 0.66677(2) 0.222362(13) 0.02859(7) Uani 1 1 d . . .
Br2 Br 0.99694(2) 1.11504(2) 0.059435(13) 0.02902(8) Uani 1 1 d . . .
Br3 Br 1.02948(2) 1.31831(2) 0.360531(11) 0.02714(7) Uani 1 1 d . . .
Br4 Br 0.80265(2) 0.84711(2) 0.504308(11) 0.02377(7) Uani 1 1 d . . .
C11 C 0.6457(2) 0.8015(2) 0.22340(11) 0.0197(4) Uani 1 1 d . . .
C12 C 0.5727(2) 0.8158(2) 0.27941(11) 0.0195(5) Uani 1 1 d . . .
O12 O 0.58950(16) 0.72244(14) 0.33111(8) 0.0232(4) Uani 1 1 d . . .
C13 C 0.4788(2) 0.9194(2) 0.28172(10) 0.0182(4) Uani 1 1 d . . .
C14 C 0.4611(2) 1.0064(2) 0.22666(10) 0.0178(4) Uani 1 1 d . . .
H14 H 0.3995 1.0788 0.2285 0.021 Uiso 1 1 calc R . .
C15 C 0.5295(2) 0.9919(2) 0.16932(10) 0.0175(4) Uani 1 1 d . . .
C16 C 0.6226(2) 0.8872(2) 0.16797(11) 0.0198(5) Uani 1 1 d . . .
O16 O 0.68633(16) 0.86117(15) 0.11085(8) 0.0239(4) Uani 1 1 d . . .
C21 C 0.8315(2) 1.1769(2) 0.09060(11) 0.0197(5) Uani 1 1 d . . .
C22 C 0.7355(2) 1.1187(2) 0.08490(10) 0.0201(5) Uani 1 1 d . . .
O22 O 0.76207(16) 1.02093(15) 0.05280(8) 0.0243(4) Uani 1 1 d . . .
C23 C 0.6140(2) 1.1592(2) 0.11046(10) 0.0180(4) Uani 1 1 d . . .
C24 C 0.5927(2) 1.2599(2) 0.14034(10) 0.0184(4) Uani 1 1 d . . .
H24 H 0.5102 1.2882 0.1581 0.022 Uiso 1 1 calc R . .
C25 C 0.6874(2) 1.3211(2) 0.14533(10) 0.0181(4) Uani 1 1 d . . .
C26 C 0.8082(2) 1.2774(2) 0.12040(10) 0.0178(4) Uani 1 1 d . . .
O26 O 0.90547(15) 1.33545(15) 0.12337(7) 0.0203(3) Uani 1 1 d . . .
C31 C 0.8607(2) 1.3321(2) 0.33505(11) 0.0188(4) Uani 1 1 d . . .
C32 C 0.8286(2) 1.3674(2) 0.26971(10) 0.0175(4) Uani 1 1 d . . .
O32 O 0.92183(15) 1.39441(14) 0.22519(7) 0.0204(3) Uani 1 1 d . . .
C33 C 0.7025(2) 1.38338(19) 0.25130(10) 0.0164(4) Uani 1 1 d . . .
C34 C 0.6138(2) 1.35754(19) 0.29904(10) 0.0172(4) Uani 1 1 d . . .
H34 H 0.5284 1.3655 0.2865 0.021 Uiso 1 1 calc R . .
C35 C 0.6441(2) 1.3205(2) 0.36427(10) 0.0184(4) Uani 1 1 d . . .
C36 C 0.7700(2) 1.3080(2) 0.38180(10) 0.0189(4) Uani 1 1 d . . .
O36 O 0.80614(16) 1.27495(15) 0.44631(7) 0.0222(3) Uani 1 1 d . . .
C41 C 0.6652(2) 0.9533(2) 0.45833(10) 0.0188(5) Uani 1 1 d . . .
C42 C 0.6491(2) 1.0742(2) 0.45741(10) 0.0184(4) Uani 1 1 d . . .
O42 O 0.72276(15) 1.11374(15) 0.49779(7) 0.0208(3) Uani 1 1 d . . .
C43 C 0.5545(2) 1.1551(2) 0.41929(10) 0.0179(4) Uani 1 1 d . . .
C44 C 0.4770(2) 1.1096(2) 0.38366(10) 0.0179(4) Uani 1 1 d . . .
H44 H 0.4139 1.1638 0.3567 0.021 Uiso 1 1 calc R . .
C45 C 0.4882(2) 0.9882(2) 0.38593(10) 0.0177(4) Uani 1 1 d . . .
C46 C 0.5848(2) 0.9096(2) 0.42388(10) 0.0185(4) Uani 1 1 d . . .
O46 O 0.59704(16) 0.78752(14) 0.43117(7) 0.0224(3) Uani 1 1 d . . .
C51 C 0.4065(2) 0.9372(2) 0.34570(10) 0.0179(4) Uani 1 1 d . . .
H51 H 0.4032 0.8560 0.3694 0.022 Uiso 1 1 calc R . .
C52 C 0.2692(2) 1.0085(2) 0.33802(11) 0.0202(5) Uani 1 1 d . . .
H52A H 0.2689 1.0880 0.3123 0.024 Uiso 1 1 calc R . .
H52B H 0.2323 1.0208 0.3816 0.024 Uiso 1 1 calc R . .
C53 C 0.1849(2) 0.9482(2) 0.30452(13) 0.0285(5) Uani 1 1 d . . .
H53A H 0.2082 0.9544 0.2576 0.034 Uiso 1 1 calc R . .
H53B H 0.2019 0.8625 0.3233 0.034 Uiso 1 1 calc R . .
C54 C 0.0441(2) 1.0026(2) 0.31176(12) 0.0268(5) Uani 1 1 d . . .
H54A H 0.0193 0.9856 0.3583 0.032 Uiso 1 1 calc R . .
H54B H 0.0305 1.0903 0.2998 0.032 Uiso 1 1 calc R . .
C55 C -0.0445(3) 0.9606(3) 0.27184(15) 0.0376(7) Uani 1 1 d . . .
H55A H -0.0326 0.8731 0.2838 0.045 Uiso 1 1 calc R . .
H55B H -0.0211 0.9779 0.2251 0.045 Uiso 1 1 calc R . .
C56 C -0.1843(3) 1.0195(3) 0.28163(14) 0.0366(6) Uani 1 1 d . . .
H56A H -0.2379 0.9788 0.2614 0.055 Uiso 1 1 calc R . .
H56B H -0.2004 1.1036 0.2614 0.055 Uiso 1 1 calc R . .
H56C H -0.2045 1.0143 0.3284 0.055 Uiso 1 1 calc R . .
C57 C 0.6675(2) 0.7288(2) 0.38243(11) 0.0250(5) Uani 1 1 d . . .
H57A H 0.7109 0.6470 0.4021 0.030 Uiso 1 1 calc R . .
H57B H 0.7341 0.7717 0.3645 0.030 Uiso 1 1 calc R . .
C61 C 0.5119(2) 1.0874(2) 0.10900(10) 0.0191(4) Uani 1 1 d . . .
H61 H 0.5315 1.0454 0.0703 0.023 Uiso 1 1 calc R . .
C62 C 0.3764(2) 1.1654(2) 0.10082(11) 0.0220(5) Uani 1 1 d . . .
H62A H 0.3142 1.1139 0.1079 0.026 Uiso 1 1 calc R . .
H62B H 0.3592 1.2189 0.1341 0.026 Uiso 1 1 calc R . .
C63 C 0.3588(2) 1.2401(2) 0.03312(11) 0.0276(5) Uani 1 1 d . . .
H63A H 0.4309 1.2799 0.0234 0.033 Uiso 1 1 calc R . .
H63B H 0.3624 1.1862 0.0007 0.033 Uiso 1 1 calc R . .
C64 C 0.2344(2) 1.3347(2) 0.02500(12) 0.0293(6) Uani 1 1 d . . .
H64A H 0.2150 1.3577 -0.0220 0.035 Uiso 1 1 calc R . .
H64B H 0.1644 1.3002 0.0468 0.035 Uiso 1 1 calc R . .
C65 C 0.2390(3) 1.4455(2) 0.05307(13) 0.0324(6) Uani 1 1 d . . .
H65A H 0.2611 1.4218 0.0997 0.039 Uiso 1 1 calc R . .
H65B H 0.3077 1.4807 0.0304 0.039 Uiso 1 1 calc R . .
C66 C 0.1151(3) 1.5398(3) 0.04726(14) 0.0373(7) Uani 1 1 d . . .
H66A H 0.0920 1.5636 0.0013 0.056 Uiso 1 1 calc R . .
H66B H 0.1259 1.6094 0.0650 0.056 Uiso 1 1 calc R . .
H66C H 0.0473 1.5073 0.0717 0.056 Uiso 1 1 calc R . .
C67 C 0.7947(2) 0.9088(2) 0.09263(12) 0.0255(5) Uani 1 1 d . . .
H67A H 0.8364 0.9168 0.1323 0.031 Uiso 1 1 calc R . .
H67B H 0.8566 0.8530 0.0690 0.031 Uiso 1 1 calc R . .
C71 C 0.6672(2) 1.4278(2) 0.18066(10) 0.0166(4) Uani 1 1 d . . .
H71 H 0.7301 1.4754 0.1614 0.020 Uiso 1 1 calc R . .
C72 C 0.5349(2) 1.5120(2) 0.17273(10) 0.0192(4) Uani 1 1 d . . .
H72A H 0.4688 1.4651 0.1835 0.023 Uiso 1 1 calc R . .
H72B H 0.5246 1.5694 0.2038 0.023 Uiso 1 1 calc R . .
C73 C 0.5150(2) 1.5804(2) 0.10373(11) 0.0268(5) Uani 1 1 d . . .
H73A H 0.5814 1.6271 0.0932 0.032 Uiso 1 1 calc R . .
H73B H 0.5262 1.5227 0.0729 0.032 Uiso 1 1 calc R . .
C74 C 0.3841(2) 1.6648(2) 0.09405(12) 0.0260(5) Uani 1 1 d . . .
H74A H 0.3708 1.6919 0.0468 0.031 Uiso 1 1 calc R . .
H74B H 0.3183 1.6200 0.1105 0.031 Uiso 1 1 calc R . .
C75 C 0.3646(3) 1.7725(3) 0.12726(16) 0.0426(7) Uani 1 1 d . . .
H75A H 0.4282 1.8192 0.1099 0.051 Uiso 1 1 calc R . .
H75B H 0.3796 1.7460 0.1745 0.051 Uiso 1 1 calc R . .
C76 C 0.2323(3) 1.8519(3) 0.11797(15) 0.0451(8) Uani 1 1 d . . .
H76A H 0.1686 1.8043 0.1309 0.068 Uiso 1 1 calc R . .
H76B H 0.2214 1.8880 0.0720 0.068 Uiso 1 1 calc R . .
H76C H 0.2212 1.9149 0.1450 0.068 Uiso 1 1 calc R . .
C77 C 0.9713(2) 1.3097(2) 0.18279(11) 0.0219(5) Uani 1 1 d . . .
H77A H 1.0626 1.3086 0.1734 0.026 Uiso 1 1 calc R . .
H77B H 0.9655 1.2293 0.2051 0.026 Uiso 1 1 calc R . .
C81 C 0.5470(2) 1.2876(2) 0.41562(10) 0.0184(4) Uani 1 1 d . . .
H81 H 0.5766 1.2987 0.4584 0.022 Uiso 1 1 calc R . .
C82 C 0.4128(2) 1.3663(2) 0.40576(11) 0.0208(5) Uani 1 1 d . . .
H82A H 0.3850 1.3670 0.3611 0.025 Uiso 1 1 calc R . .
H82B H 0.3530 1.3324 0.4369 0.025 Uiso 1 1 calc R . .
C83 C 0.4076(3) 1.4938(2) 0.41572(14) 0.0322(6) Uani 1 1 d . . .
H83A H 0.4278 1.4931 0.4616 0.039 Uiso 1 1 calc R . .
H83B H 0.4743 1.5239 0.3879 0.039 Uiso 1 1 calc R . .
C84 C 0.2790(3) 1.5794(3) 0.40001(16) 0.0425(7) Uani 1 1 d . . .
H84A H 0.2847 1.6599 0.4068 0.051 Uiso 1 1 calc R . .
H84B H 0.2619 1.5839 0.3533 0.051 Uiso 1 1 calc R . .
C85 C 0.1684(3) 1.5466(3) 0.43946(19) 0.0499(8) Uani 1 1 d . . .
H85A H 0.1839 1.5439 0.4862 0.060 Uiso 1 1 calc R . .
H85B H 0.1626 1.4657 0.4333 0.060 Uiso 1 1 calc R . .
C86 C 0.0428(4) 1.6329(4) 0.4214(3) 0.0798(14) Uani 1 1 d . . .
H86A H 0.0433 1.7106 0.4332 0.120 Uiso 1 1 calc R . .
H86B H -0.0271 1.6021 0.4448 0.120 Uiso 1 1 calc R . .
H86C H 0.0306 1.6419 0.3743 0.120 Uiso 1 1 calc R . .
C87 C 0.8318(2) 1.1515(2) 0.46993(11) 0.0247(5) Uani 1 1 d . . .
H87A H 0.8991 1.1319 0.5031 0.030 Uiso 1 1 calc R . .
H87B H 0.8648 1.1072 0.4336 0.030 Uiso 1 1 calc R . .

loop_
 _atom_site_aniso_label
 _atom_site_aniso_U_11
 _atom_site_aniso_U_22
 _atom_site_aniso_U_33
 _atom_site_aniso_U_23
 _atom_site_aniso_U_13
 _atom_site_aniso_U_12
N1S 0.0335(14) 0.066(2) 0.0403(14) -0.0122(13) 0.0043(11) -0.0134(14)
C1S 0.0297(15) 0.061(2) 0.0289(13) -0.0082(14) 0.0049(11) -0.0235(15)
C2S 0.050(2) 0.051(2) 0.0473(18) -0.0057(15) 0.0034(15) -0.0173(16)
Br1 0.02832(14) 0.01855(13) 0.03677(14) -0.00744(10) 0.00288(10) 0.00027(10)
Br2 0.02055(13) 0.03024(14) 0.03711(14) -0.01148(11) 0.00999(10) -0.00559(10)
Br3 0.01897(12) 0.03636(15) 0.02586(12) 0.00235(10) -0.00649(9) -0.00955(10)
Br4 0.01972(12) 0.02431(13) 0.02294(12) 0.00123(9) -0.00435(9) 0.00105(9)
C11 0.0194(11) 0.0141(11) 0.0261(11) -0.0068(9) 0.0009(9) -0.0025(9)
C12 0.0208(11) 0.0178(11) 0.0204(10) -0.0019(9) -0.0028(9) -0.0058(9)
O12 0.0288(9) 0.0167(8) 0.0229(8) 0.0009(6) -0.0029(7) -0.0051(7)
C13 0.0165(11) 0.0190(11) 0.0197(10) -0.0037(8) 0.0008(8) -0.0051(9)
C14 0.0179(11) 0.0167(11) 0.0198(10) -0.0036(8) -0.0009(8) -0.0052(9)
C15 0.0174(11) 0.0192(11) 0.0179(10) -0.0030(8) -0.0016(8) -0.0081(9)
C16 0.0209(11) 0.0210(11) 0.0205(10) -0.0072(9) 0.0026(9) -0.0087(9)
O16 0.0290(9) 0.0242(9) 0.0224(8) -0.0112(7) 0.0085(7) -0.0108(7)
C21 0.0147(10) 0.0224(12) 0.0199(10) -0.0037(9) 0.0044(8) -0.0007(9)
C22 0.0222(12) 0.0221(12) 0.0165(10) -0.0042(9) 0.0021(8) -0.0057(9)
O22 0.0298(9) 0.0238(9) 0.0213(8) -0.0076(7) 0.0069(7) -0.0093(7)
C23 0.0182(11) 0.0209(11) 0.0146(9) -0.0005(8) -0.0005(8) -0.0055(9)
C24 0.0172(11) 0.0209(11) 0.0154(9) -0.0006(8) -0.0015(8) -0.0022(9)
C25 0.0203(11) 0.0176(11) 0.0153(9) -0.0008(8) -0.0012(8) -0.0032(9)
C26 0.0173(11) 0.0191(11) 0.0167(9) 0.0004(8) 0.0009(8) -0.0060(9)
O26 0.0169(8) 0.0259(9) 0.0196(7) -0.0015(6) 0.0015(6) -0.0094(7)
C31 0.0161(11) 0.0189(11) 0.0224(10) -0.0038(9) -0.0034(8) -0.0049(9)
C32 0.0166(11) 0.0180(11) 0.0179(10) -0.0010(8) 0.0011(8) -0.0053(9)
O32 0.0182(8) 0.0231(8) 0.0205(7) -0.0023(6) 0.0010(6) -0.0073(7)
C33 0.0185(11) 0.0130(10) 0.0173(10) -0.0016(8) -0.0011(8) -0.0030(8)
C34 0.0158(10) 0.0158(11) 0.0191(10) -0.0020(8) -0.0014(8) -0.0022(8)
C35 0.0188(11) 0.0173(11) 0.0187(10) -0.0016(8) -0.0004(8) -0.0044(9)
C36 0.0205(11) 0.0188(11) 0.0172(10) -0.0012(8) -0.0037(8) -0.0043(9)
O36 0.0250(9) 0.0247(9) 0.0174(7) -0.0001(6) -0.0051(6) -0.0082(7)
C41 0.0160(11) 0.0229(12) 0.0136(9) 0.0026(8) -0.0003(8) -0.0004(9)
C42 0.0181(11) 0.0237(12) 0.0135(9) -0.0009(8) 0.0002(8) -0.0064(9)
O42 0.0201(8) 0.0269(9) 0.0159(7) -0.0001(6) -0.0027(6) -0.0079(7)
C43 0.0164(11) 0.0208(11) 0.0154(9) -0.0009(8) 0.0033(8) -0.0039(9)
C44 0.0154(10) 0.0221(11) 0.0145(9) -0.0016(8) 0.0026(8) -0.0026(9)
C45 0.0168(11) 0.0204(11) 0.0148(9) -0.0005(8) 0.0013(8) -0.0042(9)
C46 0.0193(11) 0.0176(11) 0.0162(9) 0.0015(8) 0.0011(8) -0.0025(9)
O46 0.0275(9) 0.0168(8) 0.0204(8) 0.0013(6) -0.0005(7) -0.0029(7)
C51 0.0169(11) 0.0193(11) 0.0172(10) -0.0011(8) 0.0004(8) -0.0049(9)
C52 0.0185(11) 0.0225(12) 0.0196(10) -0.0038(9) 0.0021(8) -0.0046(9)
C53 0.0213(12) 0.0320(14) 0.0349(13) -0.0122(11) -0.0009(10) -0.0065(10)
C54 0.0228(12) 0.0295(14) 0.0292(12) -0.0052(10) -0.0025(10) -0.0076(10)
C55 0.0260(14) 0.0434(17) 0.0487(16) -0.0173(14) -0.0033(12) -0.0108(12)
C56 0.0248(14) 0.0469(17) 0.0422(15) -0.0083(13) -0.0044(11) -0.0147(12)
C57 0.0259(12) 0.0204(12) 0.0246(11) -0.0002(9) -0.0028(9) 0.0016(10)
C61 0.0218(11) 0.0212(12) 0.0159(10) -0.0036(8) 0.0009(8) -0.0075(9)
C62 0.0208(12) 0.0264(12) 0.0198(10) -0.0020(9) -0.0029(9) -0.0082(10)
C63 0.0274(13) 0.0333(14) 0.0211(11) 0.0006(10) -0.0043(10) -0.0070(11)
C64 0.0285(13) 0.0359(15) 0.0242(11) 0.0006(10) -0.0076(10) -0.0113(11)
C65 0.0298(14) 0.0332(15) 0.0346(13) -0.0017(11) -0.0106(11) -0.0081(11)
C66 0.0342(15) 0.0365(16) 0.0401(15) 0.0003(12) -0.0116(12) -0.0076(13)
C67 0.0252(13) 0.0244(13) 0.0276(12) -0.0090(10) 0.0085(10) -0.0058(10)
C71 0.0150(10) 0.0176(11) 0.0164(9) -0.0015(8) -0.0004(8) -0.0029(8)
C72 0.0168(11) 0.0194(11) 0.0194(10) -0.0005(9) -0.0004(8) -0.0016(9)
C73 0.0252(13) 0.0288(13) 0.0212(11) 0.0048(10) -0.0011(9) -0.0016(10)
C74 0.0250(13) 0.0258(13) 0.0247(11) 0.0013(10) -0.0059(10) -0.0030(10)
C75 0.0365(16) 0.0308(16) 0.0584(19) -0.0107(14) -0.0199(14) 0.0037(13)
C76 0.0464(18) 0.0345(17) 0.0450(16) -0.0077(13) -0.0103(14) 0.0126(14)
C77 0.0169(11) 0.0248(12) 0.0231(11) -0.0053(9) -0.0010(9) -0.0021(9)
C81 0.0175(11) 0.0211(11) 0.0165(10) -0.0023(8) -0.0012(8) -0.0047(9)
C82 0.0187(11) 0.0223(12) 0.0213(10) -0.0046(9) 0.0018(9) -0.0038(9)
C83 0.0278(14) 0.0240(13) 0.0457(15) -0.0111(12) 0.0002(11) -0.0039(11)
C84 0.0393(17) 0.0264(15) 0.0568(19) -0.0109(13) -0.0029(14) 0.0064(13)
C85 0.0314(16) 0.0423(18) 0.078(2) -0.0291(17) -0.0014(16) 0.0021(14)
C86 0.036(2) 0.072(3) 0.130(4) -0.057(3) -0.005(2) 0.0207(19)
C87 0.0221(12) 0.0281(13) 0.0219(11) 0.0026(9) -0.0057(9) -0.0051(10)

_geom_special_details
;
 All esds (except the esd in the dihedral angle between two l.s. planes)
 are estimated using the full covariance matrix.  The cell esds are taken
 into account individually in the estimation of esds in distances, angles
 and torsion angles; correlations between esds in cell parameters are only
 used when they are defined by crystal symmetry.  An approximate (isotropic)
 treatment of cell esds is used for estimating esds involving l.s. planes.
;

loop_
 _geom_bond_atom_site_label_1
 _geom_bond_atom_site_label_2
 _geom_bond_distance
 _geom_bond_site_symmetry_2
 _geom_bond_publ_flag
N1S C1S 1.134(4) . ?
C1S C2S 1.454(5) . ?
C2S H1A 0.9800 . ?
C2S H1A 0.9800 . ?
C2S H1A 0.9800 . ?
Br1 C11 1.881(2) . ?
Br2 C21 1.883(2) . ?
Br3 C31 1.886(2) . ?
Br4 C41 1.885(2) . ?
C11 C12 1.381(3) . ?
C11 C16 1.387(3) . ?
C12 O12 1.385(3) . ?
C12 C13 1.390(3) . ?
O12 C57 1.418(3) . ?
C13 C14 1.388(3) . ?
C13 C51 1.525(3) . ?
C14 C15 1.381(3) . ?
C14 H14 0.9500 . ?
C15 C16 1.392(3) . ?
C15 C61 1.522(3) . ?
C16 O16 1.382(3) . ?
O16 C67 1.415(3) . ?
C21 C26 1.383(3) . ?
C21 C22 1.384(3) . ?
C22 O22 1.383(3) . ?
C22 C23 1.392(3) . ?
O22 C67 1.407(3) . ?
C23 C24 1.387(3) . ?
C23 C61 1.535(3) . ?
C24 C25 1.393(3) . ?
C24 H24 0.9500 . ?
C25 C26 1.389(3) . ?
C25 C71 1.517(3) . ?
C26 O26 1.384(3) . ?
O26 C77 1.413(3) . ?
C31 C36 1.384(3) . ?
C31 C32 1.392(3) . ?
C32 O32 1.384(3) . ?
C32 C33 1.394(3) . ?
O32 C77 1.426(3) . ?
C33 C34 1.386(3) . ?
C33 C71 1.514(3) . ?
C34 C35 1.388(3) . ?
C34 H34 0.9500 . ?
C35 C36 1.392(3) . ?
C35 C81 1.521(3) . ?
C36 O36 1.386(2) . ?
O36 C87 1.410(3) . ?
C41 C42 1.378(3) . ?
C41 C46 1.387(3) . ?
C42 O42 1.387(3) . ?
C42 C43 1.397(3) . ?
O42 C87 1.412(3) . ?
C43 C44 1.392(3) . ?
C43 C81 1.520(3) . ?
C44 C45 1.387(3) . ?
C44 H44 0.9500 . ?
C45 C46 1.397(3) . ?
C45 C51 1.525(3) . ?
C46 O46 1.383(3) . ?
O46 C57 1.407(3) . ?
C51 C52 1.521(3) . ?
C51 H51 1.0000 . ?
C52 C53 1.529(3) . ?
C52 H52A 0.9900 . ?
C52 H52B 0.9900 . ?
C53 C54 1.512(3) . ?
C53 H53A 0.9900 . ?
C53 H53B 0.9900 . ?
C54 C55 1.511(3) . ?
C54 H54A 0.9900 . ?
C54 H54B 0.9900 . ?
C55 C56 1.521(4) . ?
C55 H55A 0.9900 . ?
C55 H55B 0.9900 . ?
C56 H56A 0.9800 . ?
C56 H56B 0.9800 . ?
C56 H56C 0.9800 . ?
C57 H57A 0.9900 . ?
C57 H57B 0.9900 . ?
C61 C62 1.532(3) . ?
C61 H61 1.0000 . ?
C62 C63 1.525(3) . ?
C62 H62A 0.9900 . ?
C62 H62B 0.9900 . ?
C63 C64 1.522(4) . ?
C63 H63A 0.9900 . ?
C63 H63B 0.9900 . ?
C64 C65 1.517(4) . ?
C64 H64A 0.9900 . ?
C64 H64B 0.9900 . ?
C65 C66 1.515(4) . ?
C65 H65A 0.9900 . ?
C65 H65B 0.9900 . ?
C66 H66A 0.9800 . ?
C66 H66B 0.9800 . ?
C66 H66C 0.9800 . ?
C67 H67A 0.9900 . ?
C67 H67B 0.9900 . ?
C71 C72 1.531(3) . ?
C71 H71 1.0000 . ?
C72 C73 1.523(3) . ?
C72 H72A 0.9900 . ?
C72 H72B 0.9900 . ?
C73 C74 1.523(3) . ?
C73 H73A 0.9900 . ?
C73 H73B 0.9900 . ?
C74 C75 1.501(4) . ?
C74 H74A 0.9900 . ?
C74 H74B 0.9900 . ?
C75 C76 1.511(4) . ?
C75 H75A 0.9900 . ?
C75 H75B 0.9900 . ?
C76 H76A 0.9800 . ?
C76 H76B 0.9800 . ?
C76 H76C 0.9800 . ?
C77 H77A 0.9900 . ?
C77 H77B 0.9900 . ?
C81 C82 1.526(3) . ?
C81 H81 1.0000 . ?
C82 C83 1.525(3) . ?
C82 H82A 0.9900 . ?
C82 H82B 0.9900 . ?
C83 C84 1.523(4) . ?
C83 H83A 0.9900 . ?
C83 H83B 0.9900 . ?
C84 C85 1.498(5) . ?
C84 H84A 0.9900 . ?
C84 H84B 0.9900 . ?
C85 C86 1.511(5) . ?
C85 H85A 0.9900 . ?
C85 H85B 0.9900 . ?
C86 H86A 0.9800 . ?
C86 H86B 0.9800 . ?
C86 H86C 0.9800 . ?
C87 H87A 0.9900 . ?
C87 H87B 0.9900 . ?

loop_
 _geom_angle_atom_site_label_1
 _geom_angle_atom_site_label_2
 _geom_angle_atom_site_label_3
 _geom_angle
 _geom_angle_site_symmetry_1
 _geom_angle_site_symmetry_3
 _geom_angle_publ_flag
N1S C1S C2S 179.8(4) . . ?
C1S C2S H1A 109.5 . . ?
C1S C2S H1A 109.5 . . ?
H1A C2S H1A 109.5 . . ?
C1S C2S H1A 109.5 . . ?
H1A C2S H1A 109.5 . . ?
H1A C2S H1A 109.5 . . ?
C12 C11 C16 120.8(2) . . ?
C12 C11 Br1 120.05(17) . . ?
C16 C11 Br1 119.18(18) . . ?
C11 C12 O12 118.8(2) . . ?
C11 C12 C13 120.1(2) . . ?
O12 C12 C13 121.0(2) . . ?
C12 O12 C57 116.97(18) . . ?
C14 C13 C12 118.2(2) . . ?
C14 C13 C51 122.6(2) . . ?
C12 C13 C51 119.02(19) . . ?
C15 C14 C13 122.7(2) . . ?
C15 C14 H14 118.7 . . ?
C13 C14 H14 118.7 . . ?
C14 C15 C16 118.1(2) . . ?
C14 C15 C61 123.0(2) . . ?
C16 C15 C61 118.8(2) . . ?
O16 C16 C11 118.3(2) . . ?
O16 C16 C15 121.4(2) . . ?
C11 C16 C15 120.1(2) . . ?
C16 O16 C67 117.68(18) . . ?
C26 C21 C22 120.8(2) . . ?
C26 C21 Br2 119.91(17) . . ?
C22 C21 Br2 119.23(18) . . ?
O22 C22 C21 118.8(2) . . ?
O22 C22 C23 120.8(2) . . ?
C21 C22 C23 120.4(2) . . ?
C22 O22 C67 115.83(17) . . ?
C24 C23 C22 117.9(2) . . ?
C24 C23 C61 122.3(2) . . ?
C22 C23 C61 119.6(2) . . ?
C23 C24 C25 122.6(2) . . ?
C23 C24 H24 118.7 . . ?
C25 C24 H24 118.7 . . ?
C26 C25 C24 118.2(2) . . ?
C26 C25 C71 118.6(2) . . ?
C24 C25 C71 123.1(2) . . ?
C21 C26 O26 119.3(2) . . ?
C21 C26 C25 120.1(2) . . ?
O26 C26 C25 120.6(2) . . ?
C26 O26 C77 116.30(17) . . ?
C36 C31 C32 120.8(2) . . ?
C36 C31 Br3 119.42(16) . . ?
C32 C31 Br3 119.79(17) . . ?
O32 C32 C31 118.53(19) . . ?
O32 C32 C33 121.49(18) . . ?
C31 C32 C33 119.8(2) . . ?
C32 O32 C77 116.45(18) . . ?
C34 C33 C32 118.13(19) . . ?
C34 C33 C71 122.44(19) . . ?
C32 C33 C71 119.4(2) . . ?
C33 C34 C35 123.0(2) . . ?
C33 C34 H34 118.5 . . ?
C35 C34 H34 118.5 . . ?
C34 C35 C36 117.9(2) . . ?
C34 C35 C81 122.3(2) . . ?
C36 C35 C81 119.71(19) . . ?
C31 C36 O36 118.67(19) . . ?
C31 C36 C35 120.36(19) . . ?
O36 C36 C35 120.9(2) . . ?
C36 O36 C87 115.65(18) . . ?
C42 C41 C46 120.90(19) . . ?
C42 C41 Br4 119.23(16) . . ?
C46 C41 Br4 119.82(17) . . ?
C41 C42 O42 119.04(19) . . ?
C41 C42 C43 120.2(2) . . ?
O42 C42 C43 120.6(2) . . ?
C42 O42 C87 117.46(17) . . ?
C44 C43 C42 118.0(2) . . ?
C44 C43 C81 123.54(19) . . ?
C42 C43 C81 118.32(19) . . ?
C45 C44 C43 122.7(2) . . ?
C45 C44 H44 118.7 . . ?
C43 C44 H44 118.7 . . ?
C44 C45 C46 117.9(2) . . ?
C44 C45 C51 123.18(19) . . ?
C46 C45 C51 118.8(2) . . ?
O46 C46 C41 118.75(19) . . ?
O46 C46 C45 120.9(2) . . ?
C41 C46 C45 120.2(2) . . ?
C46 O46 C57 116.62(18) . . ?
C52 C51 C45 114.20(19) . . ?
C52 C51 C13 114.64(18) . . ?
C45 C51 C13 106.92(18) . . ?
C52 C51 H51 106.9 . . ?
C45 C51 H51 106.9 . . ?
C13 C51 H51 106.9 . . ?
C51 C52 C53 113.3(2) . . ?
C51 C52 H52A 108.9 . . ?
C53 C52 H52A 108.9 . . ?
C51 C52 H52B 108.9 . . ?
C53 C52 H52B 108.9 . . ?
H52A C52 H52B 107.7 . . ?
C54 C53 C52 112.9(2) . . ?
C54 C53 H53A 109.0 . . ?
C52 C53 H53A 109.0 . . ?
C54 C53 H53B 109.0 . . ?
C52 C53 H53B 109.0 . . ?
H53A C53 H53B 107.8 . . ?
C55 C54 C53 116.1(2) . . ?
C55 C54 H54A 108.3 . . ?
C53 C54 H54A 108.3 . . ?
C55 C54 H54B 108.3 . . ?
C53 C54 H54B 108.3 . . ?
H54A C54 H54B 107.4 . . ?
C54 C55 C56 112.9(2) . . ?
C54 C55 H55A 109.0 . . ?
C56 C55 H55A 109.0 . . ?
C54 C55 H55B 109.0 . . ?
C56 C55 H55B 109.0 . . ?
H55A C55 H55B 107.8 . . ?
C55 C56 H56A 109.5 . . ?
C55 C56 H56B 109.5 . . ?
H56A C56 H56B 109.5 . . ?
C55 C56 H56C 109.5 . . ?
H56A C56 H56C 109.5 . . ?
H56B C56 H56C 109.5 . . ?
O46 C57 O12 112.23(19) . . ?
O46 C57 H57A 109.2 . . ?
O12 C57 H57A 109.2 . . ?
O46 C57 H57B 109.2 . . ?
O12 C57 H57B 109.2 . . ?
H57A C57 H57B 107.9 . . ?
C15 C61 C62 114.50(19) . . ?
C15 C61 C23 107.17(17) . . ?
C62 C61 C23 113.37(19) . . ?
C15 C61 H61 107.1 . . ?
C62 C61 H61 107.1 . . ?
C23 C61 H61 107.1 . . ?
C63 C62 C61 111.4(2) . . ?
C63 C62 H62A 109.4 . . ?
C61 C62 H62A 109.4 . . ?
C63 C62 H62B 109.4 . . ?
C61 C62 H62B 109.4 . . ?
H62A C62 H62B 108.0 . . ?
C64 C63 C62 114.3(2) . . ?
C64 C63 H63A 108.7 . . ?
C62 C63 H63A 108.7 . . ?
C64 C63 H63B 108.7 . . ?
C62 C63 H63B 108.7 . . ?
H63A C63 H63B 107.6 . . ?
C65 C64 C63 112.9(2) . . ?
C65 C64 H64A 109.0 . . ?
C63 C64 H64A 109.0 . . ?
C65 C64 H64B 109.0 . . ?
C63 C64 H64B 109.0 . . ?
H64A C64 H64B 107.8 . . ?
C66 C65 C64 114.0(2) . . ?
C66 C65 H65A 108.7 . . ?
C64 C65 H65A 108.7 . . ?
C66 C65 H65B 108.7 . . ?
C64 C65 H65B 108.7 . . ?
H65A C65 H65B 107.6 . . ?
C65 C66 H66A 109.5 . . ?
C65 C66 H66B 109.5 . . ?
H66A C66 H66B 109.5 . . ?
C65 C66 H66C 109.5 . . ?
H66A C66 H66C 109.5 . . ?
H66B C66 H66C 109.5 . . ?
O22 C67 O16 111.71(19) . . ?
O22 C67 H67A 109.3 . . ?
O16 C67 H67A 109.3 . . ?
O22 C67 H67B 109.3 . . ?
O16 C67 H67B 109.3 . . ?
H67A C67 H67B 107.9 . . ?
C33 C71 C25 108.53(17) . . ?
C33 C71 C72 112.84(18) . . ?
C25 C71 C72 114.94(18) . . ?
C33 C71 H71 106.7 . . ?
C25 C71 H71 106.7 . . ?
C72 C71 H71 106.7 . . ?
C73 C72 C71 111.93(19) . . ?
C73 C72 H72A 109.2 . . ?
C71 C72 H72A 109.2 . . ?
C73 C72 H72B 109.2 . . ?
C71 C72 H72B 109.2 . . ?
H72A C72 H72B 107.9 . . ?
C74 C73 C72 113.3(2) . . ?
C74 C73 H73A 108.9 . . ?
C72 C73 H73A 108.9 . . ?
C74 C73 H73B 108.9 . . ?
C72 C73 H73B 108.9 . . ?
H73A C73 H73B 107.7 . . ?
C75 C74 C73 114.6(2) . . ?
C75 C74 H74A 108.6 . . ?
C73 C74 H74A 108.6 . . ?
C75 C74 H74B 108.6 . . ?
C73 C74 H74B 108.6 . . ?
H74A C74 H74B 107.6 . . ?
C74 C75 C76 112.9(2) . . ?
C74 C75 H75A 109.0 . . ?
C76 C75 H75A 109.0 . . ?
C74 C75 H75B 109.0 . . ?
C76 C75 H75B 109.0 . . ?
H75A C75 H75B 107.8 . . ?
C75 C76 H76A 109.5 . . ?
C75 C76 H76B 109.5 . . ?
H76A C76 H76B 109.5 . . ?
C75 C76 H76C 109.5 . . ?
H76A C76 H76C 109.5 . . ?
H76B C76 H76C 109.5 . . ?
O26 C77 O32 112.64(18) . . ?
O26 C77 H77A 109.1 . . ?
O32 C77 H77A 109.1 . . ?
O26 C77 H77B 109.1 . . ?
O32 C77 H77B 109.1 . . ?
H77A C77 H77B 107.8 . . ?
C43 C81 C35 107.16(18) . . ?
C43 C81 C82 114.31(18) . . ?
C35 C81 C82 114.19(18) . . ?
C43 C81 H81 106.9 . . ?
C35 C81 H81 106.9 . . ?
C82 C81 H81 106.9 . . ?
C83 C82 C81 111.54(19) . . ?
C83 C82 H82A 109.3 . . ?
C81 C82 H82A 109.3 . . ?
C83 C82 H82B 109.3 . . ?
C81 C82 H82B 109.3 . . ?
H82A C82 H82B 108.0 . . ?
C84 C83 C82 113.9(2) . . ?
C84 C83 H83A 108.8 . . ?
C82 C83 H83A 108.8 . . ?
C84 C83 H83B 108.8 . . ?
C82 C83 H83B 108.8 . . ?
H83A C83 H83B 107.7 . . ?
C85 C84 C83 115.0(3) . . ?
C85 C84 H84A 108.5 . . ?
C83 C84 H84A 108.5 . . ?
C85 C84 H84B 108.5 . . ?
C83 C84 H84B 108.5 . . ?
H84A C84 H84B 107.5 . . ?
C84 C85 C86 113.0(3) . . ?
C84 C85 H85A 109.0 . . ?
C86 C85 H85A 109.0 . . ?
C84 C85 H85B 109.0 . . ?
C86 C85 H85B 109.0 . . ?
H85A C85 H85B 107.8 . . ?
C85 C86 H86A 109.5 . . ?
C85 C86 H86B 109.5 . . ?
H86A C86 H86B 109.5 . . ?
C85 C86 H86C 109.5 . . ?
H86A C86 H86C 109.5 . . ?
H86B C86 H86C 109.5 . . ?
O36 C87 O42 112.53(19) . . ?
O36 C87 H87A 109.1 . . ?
O42 C87 H87A 109.1 . . ?
O36 C87 H87B 109.1 . . ?
O42 C87 H87B 109.1 . . ?
H87A C87 H87B 107.8 . . ?

loop_
 _geom_torsion_atom_site_label_1
 _geom_torsion_atom_site_label_2
 _geom_torsion_atom_site_label_3
 _geom_torsion_atom_site_label_4
 _geom_torsion
 _geom_torsion_site_symmetry_1
 _geom_torsion_site_symmetry_2
 _geom_torsion_site_symmetry_3
 _geom_torsion_site_symmetry_4
 _geom_torsion_publ_flag
C16 C11 C12 O12 172.9(2) . . . . ?
Br1 C11 C12 O12 -8.8(3) . . . . ?
C16 C11 C12 C13 -3.0(3) . . . . ?
Br1 C11 C12 C13 175.30(17) . . . . ?
C11 C12 O12 C57 99.1(2) . . . . ?
C13 C12 O12 C57 -85.1(3) . . . . ?
C11 C12 C13 C14 0.1(3) . . . . ?
O12 C12 C13 C14 -175.73(19) . . . . ?
C11 C12 C13 C51 -175.4(2) . . . . ?
O12 C12 C13 C51 8.8(3) . . . . ?
C12 C13 C14 C15 2.6(3) . . . . ?
C51 C13 C14 C15 177.9(2) . . . . ?
C13 C14 C15 C16 -2.2(3) . . . . ?
C13 C14 C15 C61 -179.2(2) . . . . ?
C12 C11 C16 O16 -171.3(2) . . . . ?
Br1 C11 C16 O16 10.4(3) . . . . ?
C12 C11 C16 C15 3.3(3) . . . . ?
Br1 C11 C16 C15 -174.97(17) . . . . ?
C14 C15 C16 O16 173.7(2) . . . . ?
C61 C15 C16 O16 -9.1(3) . . . . ?
C14 C15 C16 C11 -0.8(3) . . . . ?
C61 C15 C16 C11 176.4(2) . . . . ?
C11 C16 O16 C67 -100.3(2) . . . . ?
C15 C16 O16 C67 85.2(3) . . . . ?
C26 C21 C22 O22 177.87(19) . . . . ?
Br2 C21 C22 O22 -4.0(3) . . . . ?
C26 C21 C22 C23 -1.4(3) . . . . ?
Br2 C21 C22 C23 176.77(16) . . . . ?
C21 C22 O22 C67 96.0(2) . . . . ?
C23 C22 O22 C67 -84.8(3) . . . . ?
O22 C22 C23 C24 -178.08(18) . . . . ?
C21 C22 C23 C24 1.2(3) . . . . ?
O22 C22 C23 C61 6.0(3) . . . . ?
C21 C22 C23 C61 -174.70(19) . . . . ?
C22 C23 C24 C25 0.2(3) . . . . ?
C61 C23 C24 C25 175.94(19) . . . . ?
C23 C24 C25 C26 -1.3(3) . . . . ?
C23 C24 C25 C71 -177.01(19) . . . . ?
C22 C21 C26 O26 -177.94(19) . . . . ?
Br2 C21 C26 O26 3.9(3) . . . . ?
C22 C21 C26 C25 0.2(3) . . . . ?
Br2 C21 C26 C25 -177.93(16) . . . . ?
C24 C25 C26 C21 1.1(3) . . . . ?
C71 C25 C26 C21 176.99(19) . . . . ?
C24 C25 C26 O26 179.24(18) . . . . ?
C71 C25 C26 O26 -4.9(3) . . . . ?
C21 C26 O26 C77 -99.2(2) . . . . ?
C25 C26 O26 C77 82.6(2) . . . . ?
C36 C31 C32 O32 177.7(2) . . . . ?
Br3 C31 C32 O32 -1.6(3) . . . . ?
C36 C31 C32 C33 2.6(3) . . . . ?
Br3 C31 C32 C33 -176.76(17) . . . . ?
C31 C32 O32 C77 107.0(2) . . . . ?
C33 C32 O32 C77 -77.9(3) . . . . ?
O32 C32 C33 C34 -178.2(2) . . . . ?
C31 C32 C33 C34 -3.1(3) . . . . ?
O32 C32 C33 C71 1.9(3) . . . . ?
C31 C32 C33 C71 176.9(2) . . . . ?
C32 C33 C34 C35 2.2(3) . . . . ?
C71 C33 C34 C35 -177.8(2) . . . . ?
C33 C34 C35 C36 -0.6(3) . . . . ?
C33 C34 C35 C81 -177.4(2) . . . . ?
C32 C31 C36 O36 -179.0(2) . . . . ?
Br3 C31 C36 O36 0.3(3) . . . . ?
C32 C31 C36 C35 -0.9(4) . . . . ?
Br3 C31 C36 C35 178.41(18) . . . . ?
C34 C35 C36 C31 -0.1(3) . . . . ?
C81 C35 C36 C31 176.8(2) . . . . ?
C34 C35 C36 O36 178.0(2) . . . . ?
C81 C35 C36 O36 -5.1(3) . . . . ?
C31 C36 O36 C87 -99.3(2) . . . . ?
C35 C36 O36 C87 82.6(3) . . . . ?
C46 C41 C42 O42 173.3(2) . . . . ?
Br4 C41 C42 O42 -9.3(3) . . . . ?
C46 C41 C42 C43 -2.7(3) . . . . ?
Br4 C41 C42 C43 174.69(16) . . . . ?
C41 C42 O42 C87 98.8(2) . . . . ?
C43 C42 O42 C87 -85.2(3) . . . . ?
C41 C42 C43 C44 0.9(3) . . . . ?
O42 C42 C43 C44 -175.0(2) . . . . ?
C41 C42 C43 C81 -175.3(2) . . . . ?
O42 C42 C43 C81 8.7(3) . . . . ?
C42 C43 C44 C45 1.7(3) . . . . ?
C81 C43 C44 C45 177.7(2) . . . . ?
C43 C44 C45 C46 -2.4(3) . . . . ?
C43 C44 C45 C51 -178.2(2) . . . . ?
C42 C41 C46 O46 -174.0(2) . . . . ?
Br4 C41 C46 O46 8.6(3) . . . . ?
C42 C41 C46 C45 2.0(3) . . . . ?
Br4 C41 C46 C45 -175.46(16) . . . . ?
C44 C45 C46 O46 176.5(2) . . . . ?
C51 C45 C46 O46 -7.5(3) . . . . ?
C44 C45 C46 C41 0.6(3) . . . . ?
C51 C45 C46 C41 176.6(2) . . . . ?
C41 C46 O46 C57 -98.8(2) . . . . ?
C45 C46 O46 C57 85.3(3) . . . . ?
C44 C45 C51 C52 -36.9(3) . . . . ?
C46 C45 C51 C52 147.4(2) . . . . ?
C44 C45 C51 C13 91.1(3) . . . . ?
C46 C45 C51 C13 -84.7(2) . . . . ?
C14 C13 C51 C52 36.1(3) . . . . ?
C12 C13 C51 C52 -148.6(2) . . . . ?
C14 C13 C51 C45 -91.5(2) . . . . ?
C12 C13 C51 C45 83.7(2) . . . . ?
C45 C51 C52 C53 -173.20(19) . . . . ?
C13 C51 C52 C53 62.9(3) . . . . ?
C51 C52 C53 C54 165.8(2) . . . . ?
C52 C53 C54 C55 171.2(2) . . . . ?
C53 C54 C55 C56 -179.9(2) . . . . ?
C46 O46 C57 O12 -90.5(2) . . . . ?
C12 O12 C57 O46 89.9(2) . . . . ?
C14 C15 C61 C62 -31.5(3) . . . . ?
C16 C15 C61 C62 151.5(2) . . . . ?
C14 C15 C61 C23 95.2(2) . . . . ?
C16 C15 C61 C23 -81.8(2) . . . . ?
C24 C23 C61 C15 -90.2(2) . . . . ?
C22 C23 C61 C15 85.5(2) . . . . ?
C24 C23 C61 C62 37.1(3) . . . . ?
C22 C23 C61 C62 -147.2(2) . . . . ?
C15 C61 C62 C63 -167.87(19) . . . . ?
C23 C61 C62 C63 68.7(2) . . . . ?
C61 C62 C63 C64 -170.3(2) . . . . ?
C62 C63 C64 C65 79.6(3) . . . . ?
C63 C64 C65 C66 -178.4(2) . . . . ?
C22 O22 C67 O16 91.6(2) . . . . ?
C16 O16 C67 O22 -90.8(2) . . . . ?
C34 C33 C71 C25 -92.1(2) . . . . ?
C32 C33 C71 C25 87.9(2) . . . . ?
C34 C33 C71 C72 36.5(3) . . . . ?
C32 C33 C71 C72 -143.5(2) . . . . ?
C26 C25 C71 C33 -85.8(2) . . . . ?
C24 C25 C71 C33 89.9(2) . . . . ?
C26 C25 C71 C72 146.8(2) . . . . ?
C24 C25 C71 C72 -37.5(3) . . . . ?
C33 C71 C72 C73 165.1(2) . . . . ?
C25 C71 C72 C73 -69.7(3) . . . . ?
C71 C72 C73 C74 179.8(2) . . . . ?
C72 C73 C74 C75 70.9(3) . . . . ?
C73 C74 C75 C76 -178.4(3) . . . . ?
C26 O26 C77 O32 -95.2(2) . . . . ?
C32 O32 C77 O26 92.4(2) . . . . ?
C44 C43 C81 C35 -93.1(2) . . . . ?
C42 C43 C81 C35 82.9(2) . . . . ?
C44 C43 C81 C82 34.5(3) . . . . ?
C42 C43 C81 C82 -149.5(2) . . . . ?
C34 C35 C81 C43 89.7(2) . . . . ?
C36 C35 C81 C43 -87.1(2) . . . . ?
C34 C35 C81 C82 -38.0(3) . . . . ?
C36 C35 C81 C82 145.3(2) . . . . ?
C43 C81 C82 C83 168.9(2) . . . . ?
C35 C81 C82 C83 -67.2(3) . . . . ?
C81 C82 C83 C84 174.3(2) . . . . ?
C82 C83 C84 C85 59.6(4) . . . . ?
C83 C84 C85 C86 -179.0(3) . . . . ?
C36 O36 C87 O42 -90.8(2) . . . . ?
C42 O42 C87 O36 91.9(2) . . . . ?

_diffrn_measured_fraction_theta_max    0.902
_diffrn_reflns_theta_full              28.28
_diffrn_measured_fraction_theta_full   0.902
_refine_diff_density_max    0.543
_refine_diff_density_min   -0.411
_refine_diff_density_rms    0.109

#END


data_1b

_audit_creation_method            SHELXL-97
_chemical_name_systematic
;
hexyl bromo calixarene, dichloromethane
;
_chemical_name_common             ?
_chemical_melting_point           ?
_chemical_formula_moiety
;
(C52 H60 Br4 O8) (C H2 Cl2)
;
_chemical_formula_sum
 'C53 H62 Br4 Cl2 O8'
_chemical_formula_weight          1217.57

loop_
 _atom_type_symbol
 _atom_type_description
 _atom_type_scat_dispersion_real
 _atom_type_scat_dispersion_imag
 _atom_type_scat_source
 'C'  'C'   0.0033   0.0016
 'International Tables Vol C Tables 4.2.6.8 and 6.1.1.4'
 'H'  'H'   0.0000   0.0000
 'International Tables Vol C Tables 4.2.6.8 and 6.1.1.4'
 'O'  'O'   0.0106   0.0060
 'International Tables Vol C Tables 4.2.6.8 and 6.1.1.4'
 'Br'  'Br'  -0.2901   2.4595
 'International Tables Vol C Tables 4.2.6.8 and 6.1.1.4'
 'Cl'  'Cl'   0.1484   0.1585
 'International Tables Vol C Tables 4.2.6.8 and 6.1.1.4'

_symmetry_cell_setting            Monoclinic
_symmetry_space_group_name_H-M    P2(1)

loop_
 _symmetry_equiv_pos_as_xyz
 'x, y, z'
 '-x, y+1/2, -z'

_cell_length_a                    10.4432(15)
_cell_length_b                    15.049(2)
_cell_length_c                    16.320(2)
_cell_angle_alpha                 90.00
_cell_angle_beta                  97.977(3)
_cell_angle_gamma                 90.00
_cell_volume                      2540.0(6)
_cell_formula_units_Z             2
_cell_measurement_temperature     100(2)
_cell_measurement_reflns_used     4397
_cell_measurement_theta_min       2.50
_cell_measurement_theta_max       20.80

_exptl_crystal_description        plate
_exptl_crystal_colour             colorless
_exptl_crystal_size_max           0.22
_exptl_crystal_size_mid           0.19
_exptl_crystal_size_min           0.02
_exptl_crystal_density_meas       ?
_exptl_crystal_density_diffrn     1.592
_exptl_crystal_density_method     'not measured'
_exptl_crystal_F_000              1236
_exptl_absorpt_coefficient_mu     3.328
_exptl_absorpt_correction_type    none
_exptl_absorpt_correction_T_min   ?
_exptl_absorpt_correction_T_max   ?
_exptl_absorpt_process_details    ?

_exptl_special_details
;
 ?
;

_diffrn_ambient_temperature       100(2)
_diffrn_radiation_wavelength      0.71073
_diffrn_radiation_type            MoK\a
_diffrn_radiation_source          'fine-focus sealed tube'
_diffrn_radiation_monochromator   graphite
_diffrn_measurement_device_type   'Bruker P4'
_diffrn_measurement_method        '\w scans'
_diffrn_detector_area_resol_mean  ?
_diffrn_standards_number          ?
_diffrn_standards_interval_count  ?
_diffrn_standards_interval_time   ?
_diffrn_standards_decay_%         ?
_diffrn_reflns_number             22914
_diffrn_reflns_av_R_equivalents   0.0610
_diffrn_reflns_av_sigmaI/netI     0.1808
_diffrn_reflns_limit_h_min        -14
_diffrn_reflns_limit_h_max        14
_diffrn_reflns_limit_k_min        -21
_diffrn_reflns_limit_k_max        21
_diffrn_reflns_limit_l_min        -22
_diffrn_reflns_limit_l_max        22
_diffrn_reflns_theta_min          2.39
_diffrn_reflns_theta_max          30.09
_reflns_number_total              13646
_reflns_number_gt                 7209
_reflns_threshold_expression      >2sigma(I)
_reflns_Friedel_coverage          0.797

_computing_data_collection        'Bruker XSCANS'
_computing_cell_refinement        'Bruker XSCANS'
_computing_data_reduction         'Bruker SHELXTL'
_computing_structure_solution     'SHELXS-97 (Sheldrick, 1990)'
_computing_structure_refinement   'SHELXL-97 (Sheldrick, 1997)'
_computing_molecular_graphics     'Bruker SHELXTL'
_computing_publication_material   'Bruker SHELXTL'

_refine_special_details
;
 Refinement of F^2^ against ALL reflections.  The weighted R-factor wR and
 goodness of fit S are based on F^2^, conventional R-factors R are based
 on F, with F set to zero for negative F^2^. The threshold expression of
 F^2^ > 2sigma(F^2^) is used only for calculating R-factors(gt) etc. and is
 not relevant to the choice of reflections for refinement.  R-factors based
 on F^2^ are statistically about twice as large as those based on F, and R-
 factors based on ALL data will be even larger.
;

_refine_ls_structure_factor_coef  Fsqd
_refine_ls_matrix_type            full
_refine_ls_weighting_scheme       calc
_refine_ls_weighting_details
 'calc w=1/[\s^2^(Fo^2^)+(0.0150P)^2^+0.0000P] where P=(Fo^2^+2Fc^2^)/3'
_atom_sites_solution_primary      direct
_atom_sites_solution_secondary    difmap
_atom_sites_solution_hydrogens    geom
_refine_ls_hydrogen_treatment     mixed
_refine_ls_extinction_method      none
_refine_ls_extinction_coef        ?
_refine_ls_abs_structure_details
 'Flack H D (1983), Acta Cryst. A39, 876-881'
_refine_ls_abs_structure_Flack    -0.011(6)
_refine_ls_number_reflns          13646
_refine_ls_number_parameters      602
_refine_ls_number_restraints      7
_refine_ls_R_factor_all           0.1046
_refine_ls_R_factor_gt            0.0447
_refine_ls_wR_factor_ref          0.0674
_refine_ls_wR_factor_gt           0.0596
_refine_ls_goodness_of_fit_ref    0.735
_refine_ls_restrained_S_all       0.735
_refine_ls_shift/su_max           0.002
_refine_ls_shift/su_mean          0.000

loop_
 _atom_site_label
 _atom_site_type_symbol
 _atom_site_fract_x
 _atom_site_fract_y
 _atom_site_fract_z
 _atom_site_U_iso_or_equiv
 _atom_site_adp_type
 _atom_site_occupancy
 _atom_site_symmetry_multiplicity
 _atom_site_calc_flag
 _atom_site_refinement_flags
 _atom_site_disorder_assembly
 _atom_site_disorder_group
Cl1 Cl 0.68356(13) 0.79182(9) 0.29353(9) 0.0399(4) Uani 1 1 d . . .
Cl2 Cl 0.96608(13) 0.80348(10) 0.33166(8) 0.0402(4) Uani 1 1 d . . .
C1S C 0.8309(5) 0.7993(4) 0.2524(3) 0.0360(15) Uani 1 1 d . . .
H1A H 0.8300 0.8534 0.2178 0.043 Uiso 1 1 calc R . .
H1B H 0.8395 0.7473 0.2165 0.043 Uiso 1 1 calc R . .
C11 C 0.8831(4) 0.4636(3) 0.1976(3) 0.0205(12) Uani 1 1 d . . .
Br1 Br 1.06227(4) 0.49193(3) 0.21203(3) 0.02707(14) Uani 1 1 d . . .
C12 C 0.7988(4) 0.5139(3) 0.2371(3) 0.0191(11) Uani 1 1 d . . .
O12 O 0.8474(3) 0.5859(2) 0.28370(19) 0.0203(8) Uani 1 1 d . . .
C13 C 0.6676(4) 0.4925(3) 0.2269(3) 0.0185(11) Uani 1 1 d . . .
C14 C 0.6267(4) 0.4215(3) 0.1774(3) 0.0181(11) Uani 1 1 d . . .
H14 H 0.5372 0.4073 0.1701 0.022 Uiso 1 1 calc R . .
C15 C 0.7080(4) 0.3692(3) 0.1374(3) 0.0174(11) Uani 1 1 d . . .
C16 C 0.8386(5) 0.3931(3) 0.1460(3) 0.0210(12) Uani 1 1 d . . .
O16 O 0.9243(3) 0.3502(2) 0.10172(19) 0.0212(8) Uani 1 1 d . . .
C21 C 0.8403(4) 0.1018(3) 0.2127(3) 0.0200(11) Uani 1 1 d . . .
Br2 Br 1.01024(5) 0.05498(4) 0.23223(3) 0.02924(14) Uani 1 1 d . . .
C22 C 0.8128(4) 0.1685(3) 0.1553(3) 0.0195(12) Uani 1 1 d . . .
O22 O 0.9066(3) 0.1943(2) 0.10846(19) 0.0222(8) Uani 1 1 d . . .
C23 C 0.6885(4) 0.2066(3) 0.1447(3) 0.0196(12) Uani 1 1 d . . .
C24 C 0.5980(4) 0.1727(3) 0.1894(3) 0.0200(11) Uani 1 1 d . . .
H24 H 0.5144 0.1988 0.1823 0.024 Uiso 1 1 calc R . .
C25 C 0.6217(4) 0.1020(3) 0.2448(3) 0.0201(12) Uani 1 1 d . . .
C26 C 0.7475(4) 0.0665(3) 0.2564(3) 0.0193(11) Uani 1 1 d . . .
O26 O 0.7780(3) -0.0056(2) 0.30796(19) 0.0231(8) Uani 1 1 d . . .
C31 C 0.6360(4) 0.1286(3) 0.5136(3) 0.0230(12) Uani 1 1 d . . .
Br3 Br 0.76949(5) 0.09369(3) 0.59822(3) 0.02474(14) Uani 1 1 d . . .
C32 C 0.6195(4) 0.0821(3) 0.4391(3) 0.0256(13) Uani 1 1 d . . .
O32 O 0.6882(3) 0.0047(2) 0.43276(19) 0.0243(8) Uani 1 1 d . . .
C33 C 0.5283(4) 0.1123(3) 0.3748(3) 0.0182(12) Uani 1 1 d . . .
C34 C 0.4581(4) 0.1879(3) 0.3862(3) 0.0190(11) Uani 1 1 d . . .
H34 H 0.3976 0.2091 0.3416 0.023 Uiso 1 1 calc R . .
C35 C 0.4730(4) 0.2340(3) 0.4604(3) 0.0189(11) Uani 1 1 d . . .
C36 C 0.5598(4) 0.2031(3) 0.5248(3) 0.0185(12) Uani 1 1 d . . .
O36 O 0.5753(3) 0.2412(2) 0.60299(19) 0.0226(8) Uani 1 1 d . . .
C41 C 0.6856(4) 0.4877(3) 0.4974(3) 0.0232(12) Uani 1 1 d . . .
Br4 Br 0.82376(5) 0.51763(3) 0.58022(3) 0.02753(15) Uani 1 1 d . . .
C42 C 0.5938(5) 0.4256(3) 0.5148(3) 0.0212(12) Uani 1 1 d . . .
O42 O 0.5988(3) 0.3971(2) 0.5956(2) 0.0241(9) Uani 1 1 d . . .
C43 C 0.4982(4) 0.3981(3) 0.4520(3) 0.0203(12) Uani 1 1 d . . .
C44 C 0.4936(4) 0.4368(3) 0.3754(3) 0.0207(12) Uani 1 1 d . . .
H44 H 0.4297 0.4171 0.3321 0.025 Uiso 1 1 calc R . .
C45 C 0.5793(4) 0.5042(3) 0.3583(3) 0.0196(11) Uani 1 1 d . . .
C46 C 0.6764(4) 0.5280(3) 0.4213(3) 0.0217(12) Uani 1 1 d . . .
O46 O 0.7608(3) 0.5958(2) 0.40919(19) 0.0235(8) Uani 1 1 d . . .
C51 C 0.5760(4) 0.5451(3) 0.2721(3) 0.0215(12) Uani 1 1 d . . .
H51A H 0.6145 0.6058 0.2808 0.026 Uiso 1 1 calc R . .
C52 C 0.4406(4) 0.5583(3) 0.2258(3) 0.0227(12) Uani 1 1 d . . .
H52A H 0.3867 0.5889 0.2624 0.027 Uiso 1 1 calc R . .
H52B H 0.4012 0.4995 0.2115 0.027 Uiso 1 1 calc R . .
C53 C 0.4406(4) 0.6124(3) 0.1469(3) 0.0238(12) Uani 1 1 d . . .
H53A H 0.4746 0.5752 0.1048 0.029 Uiso 1 1 calc R . .
H53B H 0.4995 0.6638 0.1587 0.029 Uiso 1 1 calc R . .
C54 C 0.3055(4) 0.6466(3) 0.1112(3) 0.0238(12) Uani 1 1 d . . .
H54A H 0.3081 0.6686 0.0543 0.029 Uiso 1 1 calc R . .
H54B H 0.2436 0.5965 0.1078 0.029 Uiso 1 1 calc R . .
C55 C 0.2575(5) 0.7199(3) 0.1618(3) 0.0303(13) Uani 1 1 d . . .
H55A H 0.3221 0.7684 0.1680 0.036 Uiso 1 1 calc R . .
H55B H 0.2502 0.6968 0.2178 0.036 Uiso 1 1 calc R . .
C56 C 0.1268(5) 0.7580(3) 0.1244(3) 0.0359(15) Uani 1 1 d . . .
H56A H 0.1010 0.8047 0.1606 0.054 Uiso 1 1 calc R . .
H56B H 0.0618 0.7106 0.1188 0.054 Uiso 1 1 calc R . .
H56C H 0.1338 0.7831 0.0698 0.054 Uiso 1 1 calc R . .
C57 C 0.8692(4) 0.5750(3) 0.3707(3) 0.0230(12) Uani 1 1 d . . .
H57A H 0.8945 0.5126 0.3836 0.028 Uiso 1 1 calc R . .
H57B H 0.9423 0.6134 0.3939 0.028 Uiso 1 1 calc R . .
C61 C 0.6624(4) 0.2866(3) 0.0876(3) 0.0212(12) Uani 1 1 d . . .
H61A H 0.7181 0.2802 0.0428 0.025 Uiso 1 1 calc R . .
C62 C 0.5221(4) 0.2914(3) 0.0459(3) 0.0202(12) Uani 1 1 d . . .
H62A H 0.4977 0.2330 0.0205 0.024 Uiso 1 1 calc R . .
H62B H 0.4657 0.3025 0.0888 0.024 Uiso 1 1 calc R . .
C63 C 0.4965(4) 0.3629(3) -0.0204(3) 0.0242(12) Uani 1 1 d . . .
H63A H 0.5280 0.4205 0.0038 0.029 Uiso 1 1 calc R . .
H63B H 0.5471 0.3488 -0.0657 0.029 Uiso 1 1 calc R . .
C64 C 0.3553(4) 0.3728(3) -0.0566(3) 0.0293(13) Uani 1 1 d . . .
H64A H 0.3218 0.3144 -0.0779 0.035 Uiso 1 1 calc R . .
H64B H 0.3486 0.4145 -0.1040 0.035 Uiso 1 1 calc R . .
C65 C 0.2706(5) 0.4074(4) 0.0071(3) 0.0380(15) Uani 1 1 d . . .
H65A H 0.2688 0.3623 0.0511 0.046 Uiso 1 1 calc R . .
H65B H 0.3102 0.4621 0.0333 0.046 Uiso 1 1 calc R . .
C66 C 0.1342(5) 0.4274(4) -0.0313(4) 0.0448(17) Uani 1 1 d . . .
H66A H 0.0847 0.4494 0.0114 0.067 Uiso 1 1 calc R . .
H66B H 0.0937 0.3732 -0.0559 0.067 Uiso 1 1 calc R . .
H66C H 0.1353 0.4728 -0.0743 0.067 Uiso 1 1 calc R . .
C67 C 0.9794(4) 0.2709(3) 0.1347(3) 0.0259(13) Uani 1 1 d . . .
H67A H 0.9890 0.2743 0.1959 0.031 Uiso 1 1 calc R . .
H67B H 1.0670 0.2648 0.1187 0.031 Uiso 1 1 calc R . .
C71 C 0.5180(4) 0.0627(3) 0.2917(3) 0.0201(11) Uani 1 1 d . . .
H71A H 0.5424 -0.0006 0.3044 0.024 Uiso 1 1 calc R . .
C72 C 0.3846(4) 0.0618(3) 0.2405(3) 0.0214(12) Uani 1 1 d . . .
H72A H 0.3615 0.1228 0.2209 0.026 Uiso 1 1 calc R . .
H72B H 0.3197 0.0421 0.2755 0.026 Uiso 1 1 calc R . .
C73 C 0.3815(4) -0.0008(3) 0.1656(3) 0.0248(12) Uani 1 1 d . . .
H73A H 0.4606 0.0089 0.1397 0.030 Uiso 1 1 calc R . .
H73B H 0.3827 -0.0630 0.1854 0.030 Uiso 1 1 calc R . .
C74 C 0.2629(5) 0.0124(4) 0.0999(3) 0.0384(15) Uani 1 1 d . . .
H74A H 0.1839 0.0123 0.1272 0.046 Uiso 1 1 calc R . .
H74B H 0.2568 -0.0380 0.0606 0.046 Uiso 1 1 calc R . .
C75 C 0.2690(5) 0.0999(4) 0.0518(4) 0.0536(17) Uani 1 1 d . . .
H75A H 0.2736 0.1500 0.0914 0.064 Uiso 1 1 calc R . .
H75B H 0.3496 0.1004 0.0263 0.064 Uiso 1 1 calc R . .
C76 C 0.1581(6) 0.1146(4) -0.0138(4) 0.060(2) Uani 1 1 d . . .
H76A H 0.1697 0.1710 -0.0420 0.090 Uiso 1 1 calc R . .
H76B H 0.0779 0.1168 0.0110 0.090 Uiso 1 1 calc R . .
H76C H 0.1533 0.0658 -0.0539 0.090 Uiso 1 1 calc R . .
C77 C 0.8014(4) 0.0108(4) 0.3944(3) 0.0281(13) Uani 1 1 d . . .
H77A H 0.8657 -0.0326 0.4204 0.034 Uiso 1 1 calc R . .
H77B H 0.8389 0.0709 0.4039 0.034 Uiso 1 1 calc R . .
C81 C 0.4053(4) 0.3240(3) 0.4709(3) 0.0187(12) Uani 1 1 d . B .
H81A H 0.3952 0.3295 0.5308 0.022 Uiso 1 1 calc R . .
C82 C 0.2691(4) 0.3330(4) 0.4211(3) 0.0285(13) Uani 1 1 d . . .
H82A H 0.2424 0.3961 0.4207 0.034 Uiso 1 1 calc R A 1
H82B H 0.2726 0.3148 0.3632 0.034 Uiso 1 1 calc R A 1
C83A C 0.1707(5) 0.2784(4) 0.4553(3) 0.0379(15) Uani 0.665(9) 1 d P B 1
H83A H 0.1665 0.2935 0.5139 0.045 Uiso 0.665(9) 1 calc PR B 1
H83B H 0.1895 0.2142 0.4512 0.045 Uiso 0.665(9) 1 calc PR B 1
C84A C 0.0379(6) 0.3047(6) 0.3972(5) 0.030(2) Uiso 0.665(9) 1 d PD B 1
H84A H 0.0300 0.3702 0.3936 0.036 Uiso 0.665(9) 1 calc PR B 1
H84B H 0.0394 0.2813 0.3407 0.036 Uiso 0.665(9) 1 calc PR B 1
C85A C -0.0774(6) 0.2663(6) 0.4328(5) 0.043(3) Uiso 0.665(9) 1 d PD B 1
H85A H -0.0823 0.2939 0.4873 0.052 Uiso 0.665(9) 1 calc PR B 1
H85B H -0.0641 0.2016 0.4416 0.052 Uiso 0.665(9) 1 calc PR B 1
C86A C -0.2054(6) 0.2813(7) 0.3766(6) 0.030(3) Uiso 0.665(9) 1 d PD B 1
H86A H -0.2764 0.2563 0.4027 0.044 Uiso 0.665(9) 1 calc PR B 1
H86B H -0.2025 0.2521 0.3232 0.044 Uiso 0.665(9) 1 calc PR B 1
H86C H -0.2195 0.3452 0.3678 0.044 Uiso 0.665(9) 1 calc PR B 1
C83B C 0.1707(5) 0.2784(4) 0.4553(3) 0.0379(15) Uani 0.335(9) 1 d P B 2
H84A H 0.2159 0.2223 0.4730 0.045 Uiso 0.335(9) 1 calc PR B 2
H84B H 0.1564 0.3091 0.5069 0.045 Uiso 0.335(9) 1 calc PR B 2
C84B C 0.0440(11) 0.2512(9) 0.4180(10) 0.022(4) Uiso 0.335(9) 1 d PD B 2
H84C H 0.0121 0.2026 0.4506 0.027 Uiso 0.335(9) 1 calc PR B 2
H84D H 0.0476 0.2290 0.3612 0.027 Uiso 0.335(9) 1 calc PR B 2
C85B C -0.0472(11) 0.3312(7) 0.4153(9) 0.020(4) Uiso 0.335(9) 1 d PD B 2
H85C H -0.0123 0.3805 0.3849 0.024 Uiso 0.335(9) 1 calc PR B 2
H85D H -0.0524 0.3517 0.4724 0.024 Uiso 0.335(9) 1 calc PR B 2
C86B C -0.1834(11) 0.3069(12) 0.3726(12) 0.028(5) Uiso 0.335(9) 1 d PD B 2
H86D H -0.2390 0.3596 0.3697 0.042 Uiso 0.335(9) 1 calc PR B 2
H86E H -0.2199 0.2603 0.4043 0.042 Uiso 0.335(9) 1 calc PR B 2
H86F H -0.1782 0.2854 0.3165 0.042 Uiso 0.335(9) 1 calc PR B 2
C87 C 0.6615(5) 0.3152(3) 0.6150(3) 0.0276(13) Uani 1 1 d . . .
H87A H 0.7026 0.3164 0.6734 0.033 Uiso 1 1 calc R . .
H87B H 0.7308 0.3074 0.5798 0.033 Uiso 1 1 calc R . .

loop_
 _atom_site_aniso_label
 _atom_site_aniso_U_11
 _atom_site_aniso_U_22
 _atom_site_aniso_U_33
 _atom_site_aniso_U_23
 _atom_site_aniso_U_13
 _atom_site_aniso_U_12
Cl1 0.0318(9) 0.0365(9) 0.0510(9) -0.0025(7) 0.0047(7) -0.0049(7)
Cl2 0.0344(9) 0.0447(9) 0.0391(9) 0.0036(8) -0.0032(7) -0.0010(7)
C1S 0.037(4) 0.033(4) 0.037(4) 0.001(3) 0.002(3) -0.006(3)
C11 0.016(3) 0.022(3) 0.023(3) 0.007(2) 0.000(2) -0.001(2)
Br1 0.0181(3) 0.0332(3) 0.0306(3) -0.0022(3) 0.0058(2) -0.0045(3)
C12 0.025(3) 0.018(3) 0.015(3) 0.001(2) 0.005(2) -0.005(2)
O12 0.0196(17) 0.0205(19) 0.0213(19) -0.0024(16) 0.0046(15) -0.0061(15)
C13 0.017(3) 0.023(3) 0.014(3) 0.007(2) -0.003(2) 0.007(2)
C14 0.015(3) 0.023(3) 0.016(3) 0.011(2) -0.001(2) 0.001(2)
C15 0.016(3) 0.024(3) 0.011(3) 0.006(2) -0.003(2) 0.003(2)
C16 0.023(3) 0.026(3) 0.016(3) 0.007(2) 0.011(2) 0.002(2)
O16 0.0154(18) 0.026(2) 0.024(2) 0.0017(16) 0.0085(16) 0.0007(15)
C21 0.013(2) 0.030(3) 0.017(3) -0.001(2) 0.003(2) 0.002(2)
Br2 0.0195(3) 0.0432(4) 0.0254(3) 0.0023(3) 0.0044(2) 0.0102(3)
C22 0.013(3) 0.028(3) 0.019(3) -0.004(2) 0.005(2) -0.003(2)
O22 0.0188(18) 0.032(2) 0.0168(19) -0.0018(16) 0.0063(15) 0.0006(16)
C23 0.020(3) 0.016(3) 0.024(3) -0.003(2) 0.007(2) -0.002(2)
C24 0.019(3) 0.021(3) 0.019(3) -0.006(2) 0.001(2) 0.003(2)
C25 0.021(3) 0.030(3) 0.009(3) -0.006(2) 0.003(2) -0.003(3)
C26 0.021(3) 0.019(3) 0.017(3) -0.001(2) -0.001(2) 0.002(2)
O26 0.0230(18) 0.0226(19) 0.0242(19) 0.0035(17) 0.0049(16) 0.0095(16)
C31 0.017(3) 0.036(3) 0.016(3) 0.001(2) 0.002(2) 0.002(2)
Br3 0.0180(3) 0.0338(3) 0.0219(3) 0.0061(3) 0.0009(2) 0.0033(3)
C32 0.015(3) 0.029(3) 0.035(3) 0.013(3) 0.010(3) 0.004(2)
O32 0.0191(18) 0.033(2) 0.0228(19) 0.0032(18) 0.0093(15) 0.0034(18)
C33 0.013(3) 0.021(3) 0.021(3) 0.006(2) 0.004(2) -0.006(2)
C34 0.014(3) 0.028(3) 0.015(3) 0.002(2) 0.000(2) 0.000(2)
C35 0.014(3) 0.022(3) 0.022(3) 0.004(2) 0.006(2) -0.002(2)
C36 0.013(3) 0.033(3) 0.010(3) 0.001(2) 0.002(2) -0.003(2)
O36 0.020(2) 0.026(2) 0.022(2) -0.0011(16) 0.0032(17) -0.0005(16)
C41 0.015(2) 0.034(3) 0.020(3) -0.003(3) 0.001(2) 0.009(2)
Br4 0.0195(3) 0.0406(4) 0.0215(3) -0.0012(3) -0.0008(2) -0.0025(3)
C42 0.027(3) 0.024(3) 0.013(3) -0.002(2) 0.006(2) 0.009(2)
O42 0.0191(19) 0.033(2) 0.022(2) 0.0022(17) 0.0071(17) 0.0025(16)
C43 0.019(3) 0.021(3) 0.023(3) 0.001(2) 0.010(2) 0.009(2)
C44 0.014(3) 0.032(3) 0.016(3) -0.005(2) 0.002(2) 0.012(2)
C45 0.021(3) 0.020(3) 0.018(3) 0.003(2) 0.007(2) 0.008(2)
C46 0.007(2) 0.030(3) 0.027(3) -0.001(3) 0.000(2) 0.008(2)
O46 0.0189(18) 0.033(2) 0.0182(19) 0.0049(17) -0.0002(16) -0.0017(17)
C51 0.009(2) 0.032(3) 0.023(3) 0.001(3) 0.000(2) -0.002(2)
C52 0.019(3) 0.028(3) 0.019(3) 0.001(3) -0.002(2) 0.006(3)
C53 0.023(3) 0.034(3) 0.013(3) 0.003(2) 0.001(2) 0.000(2)
C54 0.027(3) 0.023(3) 0.023(3) 0.004(2) 0.006(2) 0.000(2)
C55 0.026(3) 0.031(3) 0.033(3) 0.003(3) 0.002(3) 0.009(2)
C56 0.034(3) 0.040(4) 0.035(3) 0.004(3) 0.011(3) 0.016(3)
C57 0.017(3) 0.031(3) 0.022(3) -0.007(2) 0.004(2) -0.004(2)
C61 0.013(3) 0.034(4) 0.016(3) -0.001(3) 0.004(2) 0.001(2)
C62 0.016(3) 0.025(3) 0.020(3) 0.002(2) 0.005(2) -0.004(2)
C63 0.019(3) 0.031(3) 0.023(3) 0.008(2) 0.005(2) -0.004(2)
C64 0.020(3) 0.033(3) 0.031(3) 0.010(3) -0.008(3) -0.003(2)
C65 0.025(3) 0.055(4) 0.032(3) 0.000(3) -0.002(3) 0.010(3)
C66 0.031(4) 0.056(4) 0.049(4) 0.011(3) 0.009(3) 0.002(3)
C67 0.016(3) 0.037(3) 0.028(3) -0.001(3) 0.011(2) -0.001(3)
C71 0.019(3) 0.021(3) 0.020(3) 0.001(2) 0.002(2) 0.001(2)
C72 0.017(3) 0.030(3) 0.017(3) 0.000(2) 0.004(2) 0.005(2)
C73 0.025(3) 0.020(3) 0.030(3) 0.001(3) 0.004(2) -0.002(2)
C74 0.027(3) 0.046(4) 0.042(4) -0.029(3) 0.005(3) -0.005(3)
C75 0.050(4) 0.044(4) 0.058(4) 0.003(4) -0.024(3) 0.007(4)
C76 0.058(5) 0.068(5) 0.050(4) -0.011(4) -0.010(4) 0.000(4)
C77 0.026(3) 0.041(4) 0.016(3) 0.002(3) -0.001(2) 0.013(3)
C81 0.012(3) 0.027(3) 0.017(3) -0.004(2) 0.002(2) 0.002(2)
C82 0.018(3) 0.046(4) 0.020(3) -0.005(3) -0.001(2) 0.013(3)
C83A 0.019(3) 0.062(4) 0.033(3) -0.018(3) 0.006(3) -0.009(3)
C83B 0.019(3) 0.062(4) 0.033(3) -0.018(3) 0.006(3) -0.009(3)
C87 0.028(3) 0.034(3) 0.020(3) -0.003(3) -0.001(3) -0.004(3)

_geom_special_details
;
 All esds (except the esd in the dihedral angle between two l.s. planes)
 are estimated using the full covariance matrix.  The cell esds are taken
 into account individually in the estimation of esds in distances, angles
 and torsion angles; correlations between esds in cell parameters are only
 used when they are defined by crystal symmetry.  An approximate (isotropic)
 treatment of cell esds is used for estimating esds involving l.s. planes.
;

loop_
 _geom_bond_atom_site_label_1
 _geom_bond_atom_site_label_2
 _geom_bond_distance
 _geom_bond_site_symmetry_2
 _geom_bond_publ_flag
Cl1 C1S 1.765(5) . ?
Cl2 C1S 1.778(5) . ?
C1S H1A 0.9900 . ?
C1S H1B 0.9900 . ?
C11 C12 1.385(6) . ?
C11 C16 1.395(6) . ?
C11 Br1 1.902(4) . ?
C12 O12 1.380(5) . ?
C12 C13 1.395(6) . ?
O12 C57 1.416(5) . ?
C13 C14 1.371(6) . ?
C13 C51 1.511(6) . ?
C14 C15 1.386(6) . ?
C14 H14 0.9500 . ?
C15 C16 1.399(6) . ?
C15 C61 1.524(6) . ?
C16 O16 1.385(5) . ?
O16 C67 1.400(5) . ?
C21 C22 1.376(6) . ?
C21 C26 1.386(5) . ?
C21 Br2 1.895(4) . ?
C22 O22 1.379(5) . ?
C22 C23 1.408(6) . ?
O22 C67 1.415(5) . ?
C23 C24 1.370(6) . ?
C23 C61 1.524(6) . ?
C24 C25 1.396(6) . ?
C24 H24 0.9500 . ?
C25 C26 1.407(6) . ?
C25 C71 1.530(6) . ?
C26 O26 1.383(5) . ?
O26 C77 1.419(5) . ?
C31 C32 1.393(7) . ?
C31 C36 1.402(6) . ?
C31 Br3 1.896(5) . ?
C32 O32 1.379(6) . ?
C32 C33 1.392(7) . ?
O32 C77 1.416(5) . ?
C33 C34 1.380(6) . ?
C33 C71 1.539(6) . ?
C34 C35 1.385(6) . ?
C34 H34 0.9500 . ?
C35 C36 1.370(6) . ?
C35 C81 1.549(6) . ?
C36 O36 1.387(5) . ?
O36 C87 1.428(5) . ?
C41 C46 1.374(6) . ?
C41 C42 1.396(6) . ?
C41 Br4 1.889(5) . ?
C42 O42 1.380(5) . ?
C42 C43 1.390(7) . ?
O42 C87 1.410(6) . ?
C43 C44 1.374(6) . ?
C43 C81 1.537(6) . ?
C44 C45 1.406(6) . ?
C44 H44 0.9500 . ?
C45 C46 1.387(6) . ?
C45 C51 1.531(6) . ?
C46 O46 1.380(5) . ?
O46 C57 1.404(4) . ?
C51 C52 1.521(6) . ?
C51 H51A 1.0000 . ?
C52 C53 1.524(6) . ?
C52 H52A 0.9900 . ?
C52 H52B 0.9900 . ?
C53 C54 1.538(6) . ?
C53 H53A 0.9900 . ?
C53 H53B 0.9900 . ?
C54 C55 1.505(6) . ?
C54 H54A 0.9900 . ?
C54 H54B 0.9900 . ?
C55 C56 1.527(6) . ?
C55 H55A 0.9900 . ?
C55 H55B 0.9900 . ?
C56 H56A 0.9800 . ?
C56 H56B 0.9800 . ?
C56 H56C 0.9800 . ?
C57 H57A 0.9900 . ?
C57 H57B 0.9900 . ?
C61 C62 1.530(6) . ?
C61 H61A 1.0000 . ?
C62 C63 1.522(6) . ?
C62 H62A 0.9900 . ?
C62 H62B 0.9900 . ?
C63 C64 1.518(6) . ?
C63 H63A 0.9900 . ?
C63 H63B 0.9900 . ?
C64 C65 1.547(6) . ?
C64 H64A 0.9900 . ?
C64 H64B 0.9900 . ?
C65 C66 1.505(6) . ?
C65 H65A 0.9900 . ?
C65 H65B 0.9900 . ?
C66 H66A 0.9800 . ?
C66 H66B 0.9800 . ?
C66 H66C 0.9800 . ?
C67 H67A 0.9900 . ?
C67 H67B 0.9900 . ?
C71 C72 1.522(6) . ?
C71 H71A 1.0000 . ?
C72 C73 1.539(6) . ?
C72 H72A 0.9900 . ?
C72 H72B 0.9900 . ?
C73 C74 1.534(6) . ?
C73 H73A 0.9900 . ?
C73 H73B 0.9900 . ?
C74 C75 1.539(7) . ?
C74 H74A 0.9900 . ?
C74 H74B 0.9900 . ?
C75 C76 1.481(7) . ?
C75 H75A 0.9900 . ?
C75 H75B 0.9900 . ?
C76 H76A 0.9800 . ?
C76 H76B 0.9800 . ?
C76 H76C 0.9800 . ?
C77 H77A 0.9900 . ?
C77 H77B 0.9900 . ?
C81 C82 1.544(6) . ?
C81 H81A 1.0000 . ?
C82 C83A 1.483(6) . ?
C82 H82A 0.9900 . ?
C82 H82B 0.9900 . ?
C83A C84A 1.617(8) . ?
C83A H83A 0.9900 . ?
C83A H83B 0.9900 . ?
C84A C85A 1.522(5) . ?
C84A H84A 0.9900 . ?
C84A H84B 0.9900 . ?
C85A C86A 1.530(5) . ?
C85A H85A 0.9900 . ?
C85A H85B 0.9900 . ?
C86A H86A 0.9800 . ?
C86A H86B 0.9800 . ?
C86A H86C 0.9800 . ?
C84B C85B 1.533(5) . ?
C84B H84C 0.9900 . ?
C84B H84D 0.9900 . ?
C85B C86B 1.539(5) . ?
C85B H85C 0.9900 . ?
C85B H85D 0.9900 . ?
C86B H86D 0.9800 . ?
C86B H86E 0.9800 . ?
C86B H86F 0.9800 . ?
C87 H87A 0.9900 . ?
C87 H87B 0.9900 . ?

loop_
 _geom_angle_atom_site_label_1
 _geom_angle_atom_site_label_2
 _geom_angle_atom_site_label_3
 _geom_angle
 _geom_angle_site_symmetry_1
 _geom_angle_site_symmetry_3
 _geom_angle_publ_flag
Cl1 C1S Cl2 111.8(3) . . ?
Cl1 C1S H1A 109.3 . . ?
Cl2 C1S H1A 109.3 . . ?
Cl1 C1S H1B 109.3 . . ?
Cl2 C1S H1B 109.3 . . ?
H1A C1S H1B 107.9 . . ?
C12 C11 C16 121.1(4) . . ?
C12 C11 Br1 119.9(4) . . ?
C16 C11 Br1 119.0(3) . . ?
O12 C12 C11 118.5(4) . . ?
O12 C12 C13 121.8(4) . . ?
C11 C12 C13 119.7(4) . . ?
C12 O12 C57 117.2(3) . . ?
C14 C13 C12 118.0(4) . . ?
C14 C13 C51 122.0(4) . . ?
C12 C13 C51 119.9(4) . . ?
C13 C14 C15 124.0(4) . . ?
C13 C14 H14 118.0 . . ?
C15 C14 H14 118.0 . . ?
C14 C15 C16 117.4(4) . . ?
C14 C15 C61 123.2(4) . . ?
C16 C15 C61 119.4(4) . . ?
O16 C16 C11 119.0(4) . . ?
O16 C16 C15 121.3(4) . . ?
C11 C16 C15 119.6(4) . . ?
C16 O16 C67 117.2(3) . . ?
C22 C21 C26 122.4(4) . . ?
C22 C21 Br2 119.2(3) . . ?
C26 C21 Br2 118.4(4) . . ?
C21 C22 O22 119.0(4) . . ?
C21 C22 C23 118.8(4) . . ?
O22 C22 C23 122.1(4) . . ?
C22 O22 C67 117.0(3) . . ?
C24 C23 C22 118.4(5) . . ?
C24 C23 C61 122.8(4) . . ?
C22 C23 C61 118.7(4) . . ?
C23 C24 C25 123.7(4) . . ?
C23 C24 H24 118.2 . . ?
C25 C24 H24 118.2 . . ?
C24 C25 C26 117.1(4) . . ?
C24 C25 C71 123.0(4) . . ?
C26 C25 C71 119.9(4) . . ?
O26 C26 C21 119.7(4) . . ?
O26 C26 C25 120.8(4) . . ?
C21 C26 C25 119.4(4) . . ?
C26 O26 C77 117.5(4) . . ?
C32 C31 C36 120.8(5) . . ?
C32 C31 Br3 119.1(4) . . ?
C36 C31 Br3 120.0(4) . . ?
O32 C32 C33 121.9(5) . . ?
O32 C32 C31 119.2(5) . . ?
C33 C32 C31 118.9(5) . . ?
C32 O32 C77 117.0(4) . . ?
C34 C33 C32 119.2(5) . . ?
C34 C33 C71 123.0(4) . . ?
C32 C33 C71 117.6(4) . . ?
C33 C34 C35 122.2(5) . . ?
C33 C34 H34 118.9 . . ?
C35 C34 H34 118.9 . . ?
C36 C35 C34 118.9(5) . . ?
C36 C35 C81 118.3(5) . . ?
C34 C35 C81 122.5(5) . . ?
C35 C36 O36 123.1(4) . . ?
C35 C36 C31 119.8(5) . . ?
O36 C36 C31 117.1(4) . . ?
C36 O36 C87 116.0(3) . . ?
C46 C41 C42 121.0(5) . . ?
C46 C41 Br4 119.5(4) . . ?
C42 C41 Br4 119.5(4) . . ?
O42 C42 C43 122.7(4) . . ?
O42 C42 C41 117.8(5) . . ?
C43 C42 C41 119.5(4) . . ?
C42 O42 C87 116.2(4) . . ?
C44 C43 C42 118.4(4) . . ?
C44 C43 C81 123.1(5) . . ?
C42 C43 C81 118.4(4) . . ?
C43 C44 C45 122.9(5) . . ?
C43 C44 H44 118.5 . . ?
C45 C44 H44 118.5 . . ?
C46 C45 C44 117.3(4) . . ?
C46 C45 C51 119.9(4) . . ?
C44 C45 C51 122.6(4) . . ?
C41 C46 O46 119.3(5) . . ?
C41 C46 C45 120.6(5) . . ?
O46 C46 C45 120.0(5) . . ?
C46 O46 C57 118.0(4) . . ?
C13 C51 C52 115.7(4) . . ?
C13 C51 C45 107.6(4) . . ?
C52 C51 C45 114.2(3) . . ?
C13 C51 H51A 106.2 . . ?
C52 C51 H51A 106.2 . . ?
C45 C51 H51A 106.2 . . ?
C51 C52 C53 112.4(4) . . ?
C51 C52 H52A 109.1 . . ?
C53 C52 H52A 109.1 . . ?
C51 C52 H52B 109.1 . . ?
C53 C52 H52B 109.1 . . ?
H52A C52 H52B 107.9 . . ?
C52 C53 C54 113.0(4) . . ?
C52 C53 H53A 109.0 . . ?
C54 C53 H53A 109.0 . . ?
C52 C53 H53B 109.0 . . ?
C54 C53 H53B 109.0 . . ?
H53A C53 H53B 107.8 . . ?
C55 C54 C53 113.3(4) . . ?
C55 C54 H54A 108.9 . . ?
C53 C54 H54A 108.9 . . ?
C55 C54 H54B 108.9 . . ?
C53 C54 H54B 108.9 . . ?
H54A C54 H54B 107.7 . . ?
C54 C55 C56 113.8(4) . . ?
C54 C55 H55A 108.8 . . ?
C56 C55 H55A 108.8 . . ?
C54 C55 H55B 108.8 . . ?
C56 C55 H55B 108.8 . . ?
H55A C55 H55B 107.7 . . ?
C55 C56 H56A 109.5 . . ?
C55 C56 H56B 109.5 . . ?
H56A C56 H56B 109.5 . . ?
C55 C56 H56C 109.5 . . ?
H56A C56 H56C 109.5 . . ?
H56B C56 H56C 109.5 . . ?
O46 C57 O12 113.3(4) . . ?
O46 C57 H57A 108.9 . . ?
O12 C57 H57A 108.9 . . ?
O46 C57 H57B 108.9 . . ?
O12 C57 H57B 108.9 . . ?
H57A C57 H57B 107.7 . . ?
C15 C61 C23 107.6(4) . . ?
C15 C61 C62 114.1(4) . . ?
C23 C61 C62 112.8(4) . . ?
C15 C61 H61A 107.3 . . ?
C23 C61 H61A 107.3 . . ?
C62 C61 H61A 107.3 . . ?
C63 C62 C61 114.3(4) . . ?
C63 C62 H62A 108.7 . . ?
C61 C62 H62A 108.7 . . ?
C63 C62 H62B 108.7 . . ?
C61 C62 H62B 108.7 . . ?
H62A C62 H62B 107.6 . . ?
C64 C63 C62 114.3(4) . . ?
C64 C63 H63A 108.7 . . ?
C62 C63 H63A 108.7 . . ?
C64 C63 H63B 108.7 . . ?
C62 C63 H63B 108.7 . . ?
H63A C63 H63B 107.6 . . ?
C63 C64 C65 112.7(4) . . ?
C63 C64 H64A 109.1 . . ?
C65 C64 H64A 109.1 . . ?
C63 C64 H64B 109.1 . . ?
C65 C64 H64B 109.1 . . ?
H64A C64 H64B 107.8 . . ?
C66 C65 C64 112.6(4) . . ?
C66 C65 H65A 109.1 . . ?
C64 C65 H65A 109.1 . . ?
C66 C65 H65B 109.1 . . ?
C64 C65 H65B 109.1 . . ?
H65A C65 H65B 107.8 . . ?
C65 C66 H66A 109.5 . . ?
C65 C66 H66B 109.5 . . ?
H66A C66 H66B 109.5 . . ?
C65 C66 H66C 109.5 . . ?
H66A C66 H66C 109.5 . . ?
H66B C66 H66C 109.5 . . ?
O16 C67 O22 113.8(4) . . ?
O16 C67 H67A 108.8 . . ?
O22 C67 H67A 108.8 . . ?
O16 C67 H67B 108.8 . . ?
O22 C67 H67B 108.8 . . ?
H67A C67 H67B 107.7 . . ?
C72 C71 C25 112.8(4) . . ?
C72 C71 C33 115.8(4) . . ?
C25 C71 C33 106.5(4) . . ?
C72 C71 H71A 107.1 . . ?
C25 C71 H71A 107.1 . . ?
C33 C71 H71A 107.1 . . ?
C71 C72 C73 110.9(4) . . ?
C71 C72 H72A 109.4 . . ?
C73 C72 H72A 109.4 . . ?
C71 C72 H72B 109.4 . . ?
C73 C72 H72B 109.4 . . ?
H72A C72 H72B 108.0 . . ?
C74 C73 C72 113.7(4) . . ?
C74 C73 H73A 108.8 . . ?
C72 C73 H73A 108.8 . . ?
C74 C73 H73B 108.8 . . ?
C72 C73 H73B 108.8 . . ?
H73A C73 H73B 107.7 . . ?
C73 C74 C75 112.4(4) . . ?
C73 C74 H74A 109.1 . . ?
C75 C74 H74A 109.1 . . ?
C73 C74 H74B 109.1 . . ?
C75 C74 H74B 109.1 . . ?
H74A C74 H74B 107.9 . . ?
C76 C75 C74 114.4(5) . . ?
C76 C75 H75A 108.7 . . ?
C74 C75 H75A 108.7 . . ?
C76 C75 H75B 108.7 . . ?
C74 C75 H75B 108.7 . . ?
H75A C75 H75B 107.6 . . ?
C75 C76 H76A 109.5 . . ?
C75 C76 H76B 109.5 . . ?
H76A C76 H76B 109.5 . . ?
C75 C76 H76C 109.5 . . ?
H76A C76 H76C 109.5 . . ?
H76B C76 H76C 109.5 . . ?
O32 C77 O26 112.9(4) . . ?
O32 C77 H77A 109.0 . . ?
O26 C77 H77A 109.0 . . ?
O32 C77 H77B 109.0 . . ?
O26 C77 H77B 109.0 . . ?
H77A C77 H77B 107.8 . . ?
C43 C81 C82 113.1(4) . . ?
C43 C81 C35 107.6(4) . . ?
C82 C81 C35 114.8(4) . . ?
C43 C81 H81A 107.0 . . ?
C82 C81 H81A 107.0 . . ?
C35 C81 H81A 107.0 . . ?
C83A C82 C81 112.9(4) . . ?
C83A C82 H82A 109.0 . . ?
C81 C82 H82A 109.0 . . ?
C83A C82 H82B 109.0 . . ?
C81 C82 H82B 109.0 . . ?
H82A C82 H82B 107.8 . . ?
C82 C83A C84A 103.1(5) . . ?
C82 C83A H83A 111.2 . . ?
C84A C83A H83A 111.2 . . ?
C82 C83A H83B 111.2 . . ?
C84A C83A H83B 111.2 . . ?
H83A C83A H83B 109.1 . . ?
C85A C84A C83A 110.1(6) . . ?
C85A C84A H84A 109.7 . . ?
C83A C84A H84A 109.7 . . ?
C85A C84A H84B 109.7 . . ?
C83A C84A H84B 109.7 . . ?
H84A C84A H84B 108.2 . . ?
C84A C85A C86A 112.8(5) . . ?
C84A C85A H85A 109.0 . . ?
C86A C85A H85A 109.0 . . ?
C84A C85A H85B 109.0 . . ?
C86A C85A H85B 109.0 . . ?
H85A C85A H85B 107.8 . . ?
C85A C86A H86A 109.5 . . ?
C85A C86A H86B 109.5 . . ?
H86A C86A H86B 109.5 . . ?
C85A C86A H86C 109.5 . . ?
H86A C86A H86C 109.5 . . ?
H86B C86A H86C 109.5 . . ?
C85B C84B H84C 109.9 . . ?
C85B C84B H84D 109.9 . . ?
H84C C84B H84D 108.3 . . ?
C84B C85B C86B 111.0(7) . . ?
C84B C85B H85C 109.4 . . ?
C86B C85B H85C 109.4 . . ?
C84B C85B H85D 109.4 . . ?
C86B C85B H85D 109.4 . . ?
H85C C85B H85D 108.0 . . ?
C85B C86B H86D 109.5 . . ?
C85B C86B H86E 109.5 . . ?
H86D C86B H86E 109.5 . . ?
C85B C86B H86F 109.5 . . ?
H86D C86B H86F 109.5 . . ?
H86E C86B H86F 109.5 . . ?
O42 C87 O36 112.7(4) . . ?
O42 C87 H87A 109.1 . . ?
O36 C87 H87A 109.1 . . ?
O42 C87 H87B 109.1 . . ?
O36 C87 H87B 109.1 . . ?
H87A C87 H87B 107.8 . . ?

loop_
 _geom_torsion_atom_site_label_1
 _geom_torsion_atom_site_label_2
 _geom_torsion_atom_site_label_3
 _geom_torsion_atom_site_label_4
 _geom_torsion
 _geom_torsion_site_symmetry_1
 _geom_torsion_site_symmetry_2
 _geom_torsion_site_symmetry_3
 _geom_torsion_site_symmetry_4
 _geom_torsion_publ_flag
C16 C11 C12 O12 -176.4(4) . . . . ?
Br1 C11 C12 O12 2.5(6) . . . . ?
C16 C11 C12 C13 1.6(7) . . . . ?
Br1 C11 C12 C13 -179.5(3) . . . . ?
C11 C12 O12 C57 -101.9(5) . . . . ?
C13 C12 O12 C57 80.1(5) . . . . ?
O12 C12 C13 C14 178.0(4) . . . . ?
C11 C12 C13 C14 0.0(7) . . . . ?
O12 C12 C13 C51 -4.1(7) . . . . ?
C11 C12 C13 C51 177.9(4) . . . . ?
C12 C13 C14 C15 0.5(7) . . . . ?
C51 C13 C14 C15 -177.3(4) . . . . ?
C13 C14 C15 C16 -2.5(7) . . . . ?
C13 C14 C15 C61 175.6(4) . . . . ?
C12 C11 C16 O16 173.8(4) . . . . ?
Br1 C11 C16 O16 -5.0(6) . . . . ?
C12 C11 C16 C15 -3.7(7) . . . . ?
Br1 C11 C16 C15 177.4(3) . . . . ?
C14 C15 C16 O16 -173.4(4) . . . . ?
C61 C15 C16 O16 8.4(7) . . . . ?
C14 C15 C16 C11 4.0(7) . . . . ?
C61 C15 C16 C11 -174.2(4) . . . . ?
C11 C16 O16 C67 98.2(5) . . . . ?
C15 C16 O16 C67 -84.3(5) . . . . ?
C26 C21 C22 O22 -173.7(4) . . . . ?
Br2 C21 C22 O22 5.4(6) . . . . ?
C26 C21 C22 C23 4.7(7) . . . . ?
Br2 C21 C22 C23 -176.2(4) . . . . ?
C21 C22 O22 C67 -98.4(5) . . . . ?
C23 C22 O22 C67 83.2(6) . . . . ?
C21 C22 C23 C24 -3.1(7) . . . . ?
O22 C22 C23 C24 175.3(4) . . . . ?
C21 C22 C23 C61 173.8(4) . . . . ?
O22 C22 C23 C61 -7.8(7) . . . . ?
C22 C23 C24 C25 -0.3(7) . . . . ?
C61 C23 C24 C25 -177.1(4) . . . . ?
C23 C24 C25 C26 2.2(7) . . . . ?
C23 C24 C25 C71 -177.5(4) . . . . ?
C22 C21 C26 O26 174.3(4) . . . . ?
Br2 C21 C26 O26 -4.7(6) . . . . ?
C22 C21 C26 C25 -2.8(7) . . . . ?
Br2 C21 C26 C25 178.1(4) . . . . ?
C24 C25 C26 O26 -177.8(4) . . . . ?
C71 C25 C26 O26 2.0(7) . . . . ?
C24 C25 C26 C21 -0.6(7) . . . . ?
C71 C25 C26 C21 179.1(4) . . . . ?
C21 C26 O26 C77 103.5(5) . . . . ?
C25 C26 O26 C77 -79.4(5) . . . . ?
C36 C31 C32 O32 -174.4(4) . . . . ?
Br3 C31 C32 O32 8.9(6) . . . . ?
C36 C31 C32 C33 1.9(7) . . . . ?
Br3 C31 C32 C33 -174.9(3) . . . . ?
C33 C32 O32 C77 84.8(5) . . . . ?
C31 C32 O32 C77 -99.1(5) . . . . ?
O32 C32 C33 C34 176.9(4) . . . . ?
C31 C32 C33 C34 0.8(6) . . . . ?
O32 C32 C33 C71 -7.3(6) . . . . ?
C31 C32 C33 C71 176.5(4) . . . . ?
C32 C33 C34 C35 -1.5(7) . . . . ?
C71 C33 C34 C35 -177.1(4) . . . . ?
C33 C34 C35 C36 -0.4(7) . . . . ?
C33 C34 C35 C81 173.5(4) . . . . ?
C34 C35 C36 O36 -175.7(4) . . . . ?
C81 C35 C36 O36 10.2(7) . . . . ?
C34 C35 C36 C31 3.1(7) . . . . ?
C81 C35 C36 C31 -171.1(4) . . . . ?
C32 C31 C36 C35 -3.9(7) . . . . ?
Br3 C31 C36 C35 172.9(3) . . . . ?
C32 C31 C36 O36 174.9(4) . . . . ?
Br3 C31 C36 O36 -8.3(6) . . . . ?
C35 C36 O36 C87 -85.3(5) . . . . ?
C31 C36 O36 C87 96.0(5) . . . . ?
C46 C41 C42 O42 -171.2(4) . . . . ?
Br4 C41 C42 O42 8.1(6) . . . . ?
C46 C41 C42 C43 5.9(7) . . . . ?
Br4 C41 C42 C43 -174.8(3) . . . . ?
C43 C42 O42 C87 84.8(5) . . . . ?
C41 C42 O42 C87 -98.2(5) . . . . ?
O42 C42 C43 C44 173.7(4) . . . . ?
C41 C42 C43 C44 -3.3(7) . . . . ?
O42 C42 C43 C81 -8.1(6) . . . . ?
C41 C42 C43 C81 174.9(4) . . . . ?
C42 C43 C44 C45 -1.4(7) . . . . ?
C81 C43 C44 C45 -179.6(4) . . . . ?
C43 C44 C45 C46 3.6(7) . . . . ?
C43 C44 C45 C51 178.3(4) . . . . ?
C42 C41 C46 O46 173.1(4) . . . . ?
Br4 C41 C46 O46 -6.2(6) . . . . ?
C42 C41 C46 C45 -3.7(7) . . . . ?
Br4 C41 C46 C45 177.0(3) . . . . ?
C44 C45 C46 C41 -1.0(7) . . . . ?
C51 C45 C46 C41 -175.8(4) . . . . ?
C44 C45 C46 O46 -177.8(4) . . . . ?
C51 C45 C46 O46 7.4(6) . . . . ?
C41 C46 O46 C57 98.7(5) . . . . ?
C45 C46 O46 C57 -84.5(5) . . . . ?
C14 C13 C51 C52 -36.7(6) . . . . ?
C12 C13 C51 C52 145.4(4) . . . . ?
C14 C13 C51 C45 92.3(5) . . . . ?
C12 C13 C51 C45 -85.5(5) . . . . ?
C46 C45 C51 C13 83.1(5) . . . . ?
C44 C45 C51 C13 -91.4(5) . . . . ?
C46 C45 C51 C52 -147.1(4) . . . . ?
C44 C45 C51 C52 38.4(6) . . . . ?
C13 C51 C52 C53 -63.5(6) . . . . ?
C45 C51 C52 C53 170.8(4) . . . . ?
C51 C52 C53 C54 -165.3(4) . . . . ?
C52 C53 C54 C55 71.7(5) . . . . ?
C53 C54 C55 C56 176.7(4) . . . . ?
C46 O46 C57 O12 91.9(5) . . . . ?
C12 O12 C57 O46 -88.8(5) . . . . ?
C14 C15 C61 C23 -94.7(5) . . . . ?
C16 C15 C61 C23 83.4(5) . . . . ?
C14 C15 C61 C62 31.3(6) . . . . ?
C16 C15 C61 C62 -150.6(4) . . . . ?
C24 C23 C61 C15 93.1(5) . . . . ?
C22 C23 C61 C15 -83.7(5) . . . . ?
C24 C23 C61 C62 -33.6(6) . . . . ?
C22 C23 C61 C62 149.6(4) . . . . ?
C15 C61 C62 C63 64.8(5) . . . . ?
C23 C61 C62 C63 -172.0(4) . . . . ?
C61 C62 C63 C64 -175.1(4) . . . . ?
C62 C63 C64 C65 66.3(6) . . . . ?
C63 C64 C65 C66 173.2(4) . . . . ?
C16 O16 C67 O22 89.6(5) . . . . ?
C22 O22 C67 O16 -88.9(5) . . . . ?
C24 C25 C71 C72 36.0(6) . . . . ?
C26 C25 C71 C72 -143.8(4) . . . . ?
C24 C25 C71 C33 -92.1(5) . . . . ?
C26 C25 C71 C33 88.2(5) . . . . ?
C34 C33 C71 C72 -34.9(6) . . . . ?
C32 C33 C71 C72 149.5(4) . . . . ?
C34 C33 C71 C25 91.4(5) . . . . ?
C32 C33 C71 C25 -84.2(5) . . . . ?
C25 C71 C72 C73 65.3(5) . . . . ?
C33 C71 C72 C73 -171.6(4) . . . . ?
C71 C72 C73 C74 -165.4(4) . . . . ?
C72 C73 C74 C75 71.5(5) . . . . ?
C73 C74 C75 C76 178.6(5) . . . . ?
C32 O32 C77 O26 -91.7(5) . . . . ?
C26 O26 C77 O32 90.3(5) . . . . ?
C44 C43 C81 C82 -33.3(6) . . . . ?
C42 C43 C81 C82 148.6(4) . . . . ?
C44 C43 C81 C35 94.6(5) . . . . ?
C42 C43 C81 C35 -83.6(5) . . . . ?
C36 C35 C81 C43 82.4(5) . . . . ?
C34 C35 C81 C43 -91.6(5) . . . . ?
C36 C35 C81 C82 -150.8(4) . . . . ?
C34 C35 C81 C82 35.3(6) . . . . ?
C43 C81 C82 C83A -163.9(4) . . . . ?
C35 C81 C82 C83A 72.2(5) . . . . ?
C81 C82 C83A C84A 176.1(5) . . . . ?
C82 C83A C84A C85A -170.4(6) . . . . ?
C83A C84A C85A C86A -174.7(7) . . . . ?
C42 O42 C87 O36 -90.1(5) . . . . ?
C36 O36 C87 O42 89.6(5) . . . . ?

_diffrn_measured_fraction_theta_max    0.982
_diffrn_reflns_theta_full              30.09
_diffrn_measured_fraction_theta_full   0.982
_refine_diff_density_max    0.790
_refine_diff_density_min   -0.656
_refine_diff_density_rms    0.092

#END


data_2a

_audit_creation_method            SHELXL-97
_chemical_name_systematic
;
NS 1 pentyl calixarene + acetonitrile
;
_chemical_name_common             ?
_chemical_melting_point           ?
_chemical_formula_moiety
;
(C72 H76 N4 O8) (C2 H3 N)3
;
_chemical_formula_sum
 'C78 H85 N7 O8'
_chemical_formula_weight          1248.53

loop_
 _atom_type_symbol
 _atom_type_description
 _atom_type_scat_dispersion_real
 _atom_type_scat_dispersion_imag
 _atom_type_scat_source
 'C'  'C'   0.0033   0.0016
 'International Tables Vol C Tables 4.2.6.8 and 6.1.1.4'
 'H'  'H'   0.0000   0.0000
 'International Tables Vol C Tables 4.2.6.8 and 6.1.1.4'
 'N'  'N'   0.0061   0.0033
 'International Tables Vol C Tables 4.2.6.8 and 6.1.1.4'
 'O'  'O'   0.0106   0.0060
 'International Tables Vol C Tables 4.2.6.8 and 6.1.1.4'

_symmetry_cell_setting            Tetragonal
_symmetry_space_group_name_H-M    P4(3)2(1)2

loop_
 _symmetry_equiv_pos_as_xyz
 'x, y, z'
 '-x, -y, z+1/2'
 '-y+1/2, x+1/2, z+3/4'
 'y+1/2, -x+1/2, z+1/4'
 '-x+1/2, y+1/2, -z+3/4'
 'x+1/2, -y+1/2, -z+1/4'
 'y, x, -z'
 '-y, -x, -z+1/2'

_cell_length_a                    18.3708(7)
_cell_length_b                    18.3708(7)
_cell_length_c                    19.8745(15)
_cell_angle_alpha                 90.00
_cell_angle_beta                  90.00
_cell_angle_gamma                 90.00
_cell_volume                      6707.4(6)
_cell_formula_units_Z             4
_cell_measurement_temperature     100(2)
_cell_measurement_reflns_used     8302
_cell_measurement_theta_min       2.35
_cell_measurement_theta_max       27.80

_exptl_crystal_description        prism
_exptl_crystal_colour             colorless
_exptl_crystal_size_max           0.24
_exptl_crystal_size_mid           0.10
_exptl_crystal_size_min           0.10
_exptl_crystal_density_meas       ?
_exptl_crystal_density_diffrn     1.236
_exptl_crystal_density_method     'not measured'
_exptl_crystal_F_000              2664
_exptl_absorpt_coefficient_mu     0.080
_exptl_absorpt_correction_type    none
_exptl_absorpt_correction_T_min   ?
_exptl_absorpt_correction_T_max   ?
_exptl_absorpt_process_details    ?

_exptl_special_details
;
 ?
;

_diffrn_ambient_temperature       100(2)
_diffrn_radiation_wavelength      0.71073
_diffrn_radiation_type            MoK\a
_diffrn_radiation_source          'fine-focus sealed tube'
_diffrn_radiation_monochromator   graphite
_diffrn_measurement_device_type   'CCD area detector'
_diffrn_measurement_method        'phi and omega scans'
_diffrn_detector_area_resol_mean  ?
_diffrn_standards_number          ?
_diffrn_standards_interval_count  ?
_diffrn_standards_interval_time   ?
_diffrn_standards_decay_%         ?
_diffrn_reflns_number             30563
_diffrn_reflns_av_R_equivalents   0.0582
_diffrn_reflns_av_sigmaI/netI     0.0413
_diffrn_reflns_limit_h_min        -22
_diffrn_reflns_limit_h_max        23
_diffrn_reflns_limit_k_min        -11
_diffrn_reflns_limit_k_max        24
_diffrn_reflns_limit_l_min        -25
_diffrn_reflns_limit_l_max        26
_diffrn_reflns_theta_min          1.87
_diffrn_reflns_theta_max          28.31
_reflns_number_total              4615
_reflns_number_gt                 3614
_reflns_threshold_expression      >2sigma(I)

_computing_data_collection        'Bruker XSCANS'
_computing_cell_refinement        'Bruker XSCANS'
_computing_data_reduction         'Bruker SHELXTL'
_computing_structure_solution     'SHELXS-97 (Sheldrick, 1990)'
_computing_structure_refinement   'SHELXL-97 (Sheldrick, 1997)'
_computing_molecular_graphics     'Bruker SHELXTL'
_computing_publication_material   'Bruker SHELXTL'

_refine_special_details
;
 Refinement of F^2^ against ALL reflections.  The weighted R-factor wR and
 goodness of fit S are based on F^2^, conventional R-factors R are based
 on F, with F set to zero for negative F^2^. The threshold expression of
 F^2^ > 2sigma(F^2^) is used only for calculating R-factors(gt) etc. and is
 not relevant to the choice of reflections for refinement.  R-factors based
 on F^2^ are statistically about twice as large as those based on F, and R-
 factors based on ALL data will be even larger.
;

_refine_ls_structure_factor_coef  Fsqd
_refine_ls_matrix_type            full
_refine_ls_weighting_scheme       calc
_refine_ls_weighting_details
 'calc w=1/[\s^2^(Fo^2^)+(0.0700P)^2^+2.0000P] where P=(Fo^2^+2Fc^2^)/3'
_atom_sites_solution_primary      direct
_atom_sites_solution_secondary    difmap
_atom_sites_solution_hydrogens    geom
_refine_ls_hydrogen_treatment     mixed
_refine_ls_extinction_method      none
_refine_ls_extinction_coef        ?
_refine_ls_number_reflns          4615
_refine_ls_number_parameters      486
_refine_ls_number_restraints      34
_refine_ls_R_factor_all           0.0744
_refine_ls_R_factor_gt            0.0514
_refine_ls_wR_factor_ref          0.1353
_refine_ls_wR_factor_gt           0.1234
_refine_ls_goodness_of_fit_ref    1.059
_refine_ls_restrained_S_all       1.078
_refine_ls_shift/su_max           0.000
_refine_ls_shift/su_mean          0.000

loop_
 _atom_site_label
 _atom_site_type_symbol
 _atom_site_fract_x
 _atom_site_fract_y
 _atom_site_fract_z
 _atom_site_U_iso_or_equiv
 _atom_site_adp_type
 _atom_site_occupancy
 _atom_site_symmetry_multiplicity
 _atom_site_calc_flag
 _atom_site_refinement_flags
 _atom_site_disorder_assembly
 _atom_site_disorder_group
N1S N 0.39231(19) 0.60769(19) 0.2500 0.0478(11) Uani 1 2 d S A 1
C1S C 0.3478(2) 0.6522(2) 0.2500 0.0407(12) Uani 1 2 d SD A 1
C2S C 0.2927(2) 0.7073(2) 0.2500 0.0540(16) Uani 1 2 d SD A 1
H2A H 0.292(6) 0.731(6) 0.294(3) 0.081 Uiso 0.50 1 d PD B 1
H2B H 0.2458(14) 0.6843(15) 0.240(8) 0.081 Uiso 0.50 1 d PD C 1
H2C H 0.304(5) 0.743(5) 0.215(5) 0.081 Uiso 0.50 1 d PD D 1
N2S N 0.09723(19) 0.09723(19) 0.0000 0.0538(13) Uani 1 2 d S E 2
C3S C 0.1669(4) 0.1128(3) -0.0055(4) 0.0336(15) Uani 0.50 1 d PD E 2
C4S C 0.2332(4) 0.1249(4) -0.0144(4) 0.0383(17) Uani 0.50 1 d PD E 2
H4A H 0.2669(8) 0.0830(12) -0.005(3) 0.057 Uiso 0.50 1 d PD F 2
H4B H 0.2552(12) 0.165(2) 0.013(2) 0.057 Uiso 0.50 1 d PD G 2
H4C H 0.2476(11) 0.139(3) -0.0613(9) 0.057 Uiso 0.50 1 d PD H 2
N3S N 0.2837(4) 0.1384(4) -0.0386(4) 0.0471(17) Uani 0.50 1 d P I 3
C5S C 0.2901(4) 0.1962(4) -0.0161(3) 0.0348(16) Uani 0.50 1 d PD I 3
C6S C 0.2992(5) 0.2675(5) 0.0113(5) 0.056(3) Uani 0.50 1 d PD I 3
H6A H 0.3473(16) 0.2858(18) -0.001(3) 0.084 Uiso 0.50 1 d PD J 3
H6B H 0.261(2) 0.2993(12) -0.007(3) 0.084 Uiso 0.50 1 d PD K 3
H6C H 0.295(4) 0.2646(13) 0.0603(6) 0.084 Uiso 0.50 1 d PD L 3
C11 C 0.58643(16) 0.39858(17) 0.05326(13) 0.0225(6) Uani 1 1 d . . .
C12 C 0.51552(17) 0.37886(17) 0.07148(14) 0.0229(6) Uani 1 1 d . . .
O12 O 0.49073(11) 0.31045(11) 0.05177(9) 0.0234(5) Uani 1 1 d . . .
C13 C 0.46873(16) 0.42703(16) 0.10457(13) 0.0212(6) Uani 1 1 d . N .
C14 C 0.49518(16) 0.49658(17) 0.11853(12) 0.0218(6) Uani 1 1 d . . .
H14 H 0.4645 0.5300 0.1415 0.026 Uiso 1 1 calc R . .
C15 C 0.56452(17) 0.51883(17) 0.10013(14) 0.0218(6) Uani 1 1 d . . .
C16 C 0.60938(16) 0.46860(17) 0.06773(14) 0.0219(6) Uani 1 1 d . . .
O16 O 0.67811(12) 0.48964(12) 0.04511(9) 0.0245(5) Uani 1 1 d . . .
C21 C 0.43267(15) 0.25183(16) 0.25640(15) 0.0223(6) Uani 1 1 d . . .
C22 C 0.42873(16) 0.29156(17) 0.31604(14) 0.0221(6) Uani 1 1 d . . .
O22 O 0.43969(12) 0.25535(12) 0.37626(10) 0.0239(5) Uani 1 1 d . . .
C23 C 0.40953(16) 0.36549(17) 0.31709(14) 0.0216(6) Uani 1 1 d . . .
C24 C 0.39795(15) 0.40002(16) 0.25572(14) 0.0218(6) Uani 1 1 d . . .
H24 H 0.3864 0.4504 0.2553 0.026 Uiso 1 1 calc R . .
C25 C 0.40283(16) 0.36286(17) 0.19478(14) 0.0217(6) Uani 1 1 d . N .
C26 C 0.41983(16) 0.28914(17) 0.19615(14) 0.0216(6) Uani 1 1 d . . .
O26 O 0.42294(11) 0.25030(12) 0.13597(10) 0.0244(5) Uani 1 1 d . . .
N31 N 0.69240(19) 0.3017(2) -0.08171(17) 0.0483(8) Uani 1 1 d . . .
C32 C 0.64612(19) 0.34373(19) -0.04843(16) 0.0328(7) Uani 1 1 d . . .
H32 H 0.6163 0.3753 -0.0744 0.039 Uiso 1 1 calc R . .
C33 C 0.63729(17) 0.34572(16) 0.02025(15) 0.0243(6) Uani 1 1 d . . .
C34 C 0.6787(2) 0.2980(2) 0.0574(2) 0.0457(10) Uani 1 1 d . . .
H34 H 0.6745 0.2962 0.1050 0.055 Uiso 1 1 calc R . .
C35 C 0.7268(2) 0.2523(2) 0.0237(3) 0.0583(13) Uani 1 1 d . . .
H35 H 0.7558 0.2184 0.0479 0.070 Uiso 1 1 calc R . .
C36 C 0.7319(2) 0.2569(2) -0.0450(2) 0.0501(11) Uani 1 1 d . . .
H36 H 0.7657 0.2262 -0.0673 0.060 Uiso 1 1 calc R . .
N41 N 0.40270(16) 0.05305(15) 0.22138(14) 0.0301(6) Uani 1 1 d . . .
C42 C 0.39670(18) 0.12554(18) 0.22415(15) 0.0258(7) Uani 1 1 d . . .
H42 H 0.3558 0.1471 0.2028 0.031 Uiso 1 1 calc R . .
C43 C 0.44613(17) 0.17186(16) 0.25609(14) 0.0232(6) Uani 1 1 d . . .
C44 C 0.50583(18) 0.13918(18) 0.28635(16) 0.0286(7) Uani 1 1 d . . .
H44 H 0.5417 0.1681 0.3081 0.034 Uiso 1 1 calc R . .
C45 C 0.51282(19) 0.06443(19) 0.28459(17) 0.0321(7) Uani 1 1 d . . .
H45 H 0.5529 0.0412 0.3059 0.038 Uiso 1 1 calc R . .
C46 C 0.46072(18) 0.02383(18) 0.25150(18) 0.0319(7) Uani 1 1 d . . .
H46 H 0.4664 -0.0275 0.2501 0.038 Uiso 1 1 calc R . .
C51 C 0.39390(16) 0.40181(17) 0.12693(13) 0.0225(6) Uani 1 1 d . . .
H51 H 0.3771 0.3646 0.0937 0.027 Uiso 1 1 calc R M 1
C52A C 0.33670(17) 0.46270(18) 0.12775(15) 0.0252(7) Uani 0.894(4) 1 d P N 1
H52A H 0.3525 0.5012 0.1594 0.030 Uiso 0.894(4) 1 calc PR N 1
H52B H 0.3337 0.4847 0.0824 0.030 Uiso 0.894(4) 1 calc PR N 1
C53A C 0.2610(2) 0.4358(3) 0.1485(2) 0.0282(10) Uani 0.894(4) 1 d P N 1
H53A H 0.2629 0.4187 0.1957 0.034 Uiso 0.894(4) 1 calc PR N 1
H53B H 0.2475 0.3938 0.1199 0.034 Uiso 0.894(4) 1 calc PR N 1
C54A C 0.2015(2) 0.4945(2) 0.14232(19) 0.0281(8) Uani 0.894(4) 1 d P N 1
H54A H 0.1573 0.4773 0.1661 0.034 Uiso 0.894(4) 1 calc PR N 1
H54B H 0.2184 0.5392 0.1653 0.034 Uiso 0.894(4) 1 calc PR N 1
C55A C 0.1810(2) 0.5137(2) 0.07066(18) 0.0321(9) Uani 0.894(4) 1 d P N 1
H55A H 0.1628 0.4694 0.0477 0.039 Uiso 0.894(4) 1 calc PR N 1
H55B H 0.2251 0.5303 0.0465 0.039 Uiso 0.894(4) 1 calc PR N 1
C56A C 0.1230(2) 0.5730(2) 0.0665(2) 0.0409(10) Uani 0.894(4) 1 d P N 1
H56A H 0.1182 0.5894 0.0198 0.061 Uiso 0.894(4) 1 calc PR N 1
H56B H 0.1373 0.6142 0.0949 0.061 Uiso 0.894(4) 1 calc PR N 1
H56C H 0.0763 0.5536 0.0821 0.061 Uiso 0.894(4) 1 calc PR N 1
C52B C 0.33670(17) 0.46270(18) 0.12775(15) 0.0252(7) Uani 0.106(4) 1 d PD N 2
H52C H 0.3480 0.4951 0.1662 0.030 Uiso 0.106(4) 1 calc PR N 2
H52D H 0.3431 0.4918 0.0862 0.030 Uiso 0.106(4) 1 calc PR N 2
C53B C 0.2561(5) 0.4418(13) 0.133(3) 0.0282(10) Uani 0.106(4) 1 d PD N 2
H53C H 0.2446 0.4263 0.1792 0.034 Uiso 0.106(4) 1 calc PR N 2
H53D H 0.2458 0.4005 0.1022 0.034 Uiso 0.106(4) 1 calc PR N 2
C54B C 0.2081(6) 0.5075(13) 0.1133(17) 0.0281(8) Uani 0.106(4) 1 d PD N 2
H54C H 0.2242 0.5511 0.1386 0.034 Uiso 0.106(4) 1 calc PR N 2
H54D H 0.2136 0.5178 0.0647 0.034 Uiso 0.106(4) 1 calc PR N 2
C55B C 0.1276(7) 0.4919(14) 0.1292(15) 0.0321(9) Uani 0.106(4) 1 d PD N 2
H55C H 0.1222 0.4800 0.1776 0.039 Uiso 0.106(4) 1 calc PR N 2
H55D H 0.1109 0.4493 0.1028 0.039 Uiso 0.106(4) 1 calc PR N 2
C56B C 0.0804(10) 0.5588(16) 0.1118(19) 0.0409(10) Uani 0.106(4) 1 d PD N 2
H56D H 0.0767 0.5636 0.0628 0.061 Uiso 0.106(4) 1 calc PR N 2
H56E H 0.1029 0.6027 0.1306 0.061 Uiso 0.106(4) 1 calc PR N 2
H56F H 0.0316 0.5526 0.1310 0.061 Uiso 0.106(4) 1 calc PR N 2
C57 C 0.48994(17) 0.25418(17) 0.10145(14) 0.0251(6) Uani 1 1 d . . .
H57A H 0.4996 0.2068 0.0794 0.030 Uiso 1 1 calc R . .
H57B H 0.5295 0.2631 0.1343 0.030 Uiso 1 1 calc R . .
C61 C 0.40576(16) 0.40645(17) 0.38386(13) 0.0227(6) Uani 1 1 d . . .
H61 H 0.3934 0.3700 0.4194 0.027 Uiso 1 1 calc R . .
C62 C 0.34694(17) 0.46582(18) 0.38623(15) 0.0254(7) Uani 1 1 d . . .
H62A H 0.3553 0.4967 0.4263 0.030 Uiso 1 1 calc R . .
H62B H 0.3519 0.4971 0.3459 0.030 Uiso 1 1 calc R . .
C63 C 0.26947(18) 0.4358(2) 0.38891(17) 0.0326(8) Uani 1 1 d . . .
H63A H 0.2603 0.4064 0.3480 0.039 Uiso 1 1 calc R . .
H63B H 0.2647 0.4032 0.4284 0.039 Uiso 1 1 calc R . .
C64 C 0.21264(18) 0.4957(2) 0.39363(16) 0.0348(8) Uani 1 1 d . . .
H64A H 0.1661 0.4741 0.4089 0.042 Uiso 1 1 calc R . .
H64B H 0.2283 0.5313 0.4281 0.042 Uiso 1 1 calc R . .
C65 C 0.1995(2) 0.5358(2) 0.32784(17) 0.0350(8) Uani 1 1 d . . .
H65A H 0.1806 0.5010 0.2941 0.042 Uiso 1 1 calc R . .
H65B H 0.2464 0.5550 0.3110 0.042 Uiso 1 1 calc R . .
C66 C 0.1456(2) 0.5987(2) 0.33523(19) 0.0422(9) Uani 1 1 d . . .
H66A H 0.1397 0.6232 0.2917 0.063 Uiso 1 1 calc R . .
H66B H 0.1641 0.6335 0.3684 0.063 Uiso 1 1 calc R . .
H66C H 0.0985 0.5798 0.3502 0.063 Uiso 1 1 calc R . .
C67 C 0.50868(17) 0.26454(17) 0.40755(14) 0.0243(6) Uani 1 1 d . . .
H67A H 0.5222 0.2186 0.4305 0.036 Uiso 1 1 calc R . .
H67B H 0.5456 0.2741 0.3724 0.036 Uiso 1 1 calc R . .

loop_
 _atom_site_aniso_label
 _atom_site_aniso_U_11
 _atom_site_aniso_U_22
 _atom_site_aniso_U_33
 _atom_site_aniso_U_23
 _atom_site_aniso_U_13
 _atom_site_aniso_U_12
N1S 0.0471(18) 0.0471(18) 0.049(3) 0.0002(17) 0.0002(17) 0.000(2)
C1S 0.0468(19) 0.0468(19) 0.028(2) 0.0019(17) 0.0019(17) 0.000(3)
C2S 0.064(2) 0.064(2) 0.035(3) 0.008(2) 0.008(2) 0.020(3)
N2S 0.0566(19) 0.0566(19) 0.048(3) 0.013(2) -0.013(2) -0.014(3)
C3S 0.044(4) 0.024(3) 0.033(3) 0.006(3) -0.004(3) 0.010(3)
C4S 0.024(4) 0.026(4) 0.065(5) -0.005(3) -0.002(4) 0.005(3)
N3S 0.044(4) 0.039(4) 0.058(4) -0.006(3) -0.015(3) 0.007(3)
C5S 0.031(4) 0.036(4) 0.037(4) 0.005(3) -0.002(3) -0.004(3)
C6S 0.058(6) 0.066(7) 0.044(6) -0.016(5) -0.003(4) -0.025(6)
C11 0.0251(16) 0.0271(16) 0.0152(11) 0.0013(11) -0.0016(11) 0.0036(12)
C12 0.0250(15) 0.0260(16) 0.0176(13) 0.0018(11) -0.0028(12) -0.0009(13)
O12 0.0273(12) 0.0239(11) 0.0191(9) -0.0017(8) -0.0007(8) -0.0012(9)
C13 0.0248(16) 0.0252(16) 0.0138(12) 0.0007(11) -0.0040(11) 0.0015(12)
C14 0.0249(16) 0.0252(16) 0.0151(11) -0.0001(11) -0.0001(11) 0.0069(11)
C15 0.0256(16) 0.0237(15) 0.0160(12) 0.0035(11) -0.0025(11) 0.0022(12)
C16 0.0217(15) 0.0277(16) 0.0165(12) 0.0006(12) 0.0004(11) 0.0000(12)
O16 0.0272(12) 0.0291(12) 0.0171(9) 0.0014(8) 0.0009(8) -0.0022(9)
C21 0.0167(14) 0.0269(16) 0.0234(13) 0.0016(13) 0.0006(12) -0.0013(12)
C22 0.0174(14) 0.0277(16) 0.0212(13) 0.0028(12) 0.0006(11) -0.0036(12)
O22 0.0264(12) 0.0260(11) 0.0192(9) 0.0028(8) 0.0010(8) -0.0032(9)
C23 0.0171(14) 0.0269(16) 0.0209(13) -0.0009(12) 0.0011(11) 0.0006(12)
C24 0.0166(14) 0.0260(16) 0.0228(13) -0.0013(12) 0.0027(12) -0.0011(11)
C25 0.0176(14) 0.0277(16) 0.0199(13) 0.0017(12) -0.0012(11) -0.0023(12)
C26 0.0181(15) 0.0252(16) 0.0216(13) -0.0018(12) 0.0011(11) -0.0016(12)
O26 0.0264(11) 0.0266(11) 0.0202(10) -0.0029(8) -0.0004(8) -0.0032(9)
N31 0.0373(19) 0.054(2) 0.0536(19) -0.0199(17) 0.0111(16) 0.0008(16)
C32 0.0309(19) 0.036(2) 0.0314(16) -0.0093(15) 0.0042(14) -0.0015(14)
C33 0.0218(16) 0.0212(16) 0.0300(15) -0.0010(12) 0.0031(12) -0.0010(12)
C34 0.039(2) 0.051(2) 0.047(2) 0.0152(19) 0.0069(17) 0.0148(18)
C35 0.036(2) 0.038(2) 0.101(4) 0.021(2) 0.004(2) 0.0128(18)
C36 0.035(2) 0.038(2) 0.078(3) -0.025(2) 0.018(2) -0.0061(17)
N41 0.0317(16) 0.0278(15) 0.0309(13) -0.0023(11) 0.0023(12) -0.0043(12)
C42 0.0245(16) 0.0293(17) 0.0236(13) -0.0002(12) 0.0019(12) -0.0023(13)
C43 0.0269(16) 0.0239(15) 0.0188(13) 0.0004(12) 0.0044(12) -0.0014(12)
C44 0.0282(18) 0.0274(17) 0.0303(15) -0.0052(13) 0.0003(13) -0.0007(13)
C45 0.0287(18) 0.0318(18) 0.0357(17) -0.0009(14) -0.0037(14) 0.0057(14)
C46 0.0359(18) 0.0245(16) 0.0353(16) -0.0015(15) 0.0084(15) -0.0001(14)
C51 0.0243(16) 0.0257(16) 0.0175(12) -0.0019(11) -0.0019(11) 0.0009(12)
C52A 0.0256(16) 0.0281(17) 0.0218(14) -0.0006(12) -0.0018(12) 0.0049(13)
C53A 0.0251(17) 0.035(2) 0.025(3) 0.0006(15) -0.0076(14) 0.0061(15)
C54A 0.0244(18) 0.040(2) 0.0198(17) -0.0001(17) -0.0013(14) 0.0062(16)
C55A 0.028(2) 0.042(2) 0.0261(17) -0.0001(16) -0.0024(14) 0.0055(17)
C56A 0.031(2) 0.042(2) 0.050(2) 0.001(2) -0.0053(18) 0.0077(18)
C52B 0.0256(16) 0.0281(17) 0.0218(14) -0.0006(12) -0.0018(12) 0.0049(13)
C53B 0.0251(17) 0.035(2) 0.025(3) 0.0006(15) -0.0076(14) 0.0061(15)
C54B 0.0244(18) 0.040(2) 0.0198(17) -0.0001(17) -0.0013(14) 0.0062(16)
C55B 0.028(2) 0.042(2) 0.0261(17) -0.0001(16) -0.0024(14) 0.0055(17)
C56B 0.031(2) 0.042(2) 0.050(2) 0.001(2) -0.0053(18) 0.0077(18)
C57 0.0279(17) 0.0241(16) 0.0233(13) 0.0003(12) 0.0011(12) 0.0021(13)
C61 0.0220(16) 0.0285(17) 0.0178(12) 0.0009(12) 0.0038(11) 0.0003(12)
C62 0.0256(16) 0.0304(17) 0.0201(13) -0.0016(12) 0.0036(12) 0.0034(13)
C63 0.0265(18) 0.039(2) 0.0322(16) -0.0021(15) 0.0046(14) 0.0050(14)
C64 0.0258(17) 0.050(2) 0.0284(15) -0.0070(15) 0.0023(14) 0.0066(15)
C65 0.0297(19) 0.043(2) 0.0324(17) -0.0055(15) 0.0035(14) 0.0039(16)
C66 0.032(2) 0.048(2) 0.047(2) -0.0091(18) -0.0053(16) 0.0095(17)
C67 0.0280(17) 0.0236(16) 0.0213(13) 0.0022(12) -0.0003(12) 0.0018(13)

_geom_special_details
;
 All esds (except the esd in the dihedral angle between two l.s. planes)
 are estimated using the full covariance matrix.  The cell esds are taken
 into account individually in the estimation of esds in distances, angles
 and torsion angles; correlations between esds in cell parameters are only
 used when they are defined by crystal symmetry.  An approximate (isotropic)
 treatment of cell esds is used for estimating esds involving l.s. planes.
;

loop_
 _geom_bond_atom_site_label_1
 _geom_bond_atom_site_label_2
 _geom_bond_distance
 _geom_bond_site_symmetry_2
 _geom_bond_publ_flag
N1S C1S 1.157(7) . ?
C1S C2S 1.431(7) . ?
C2S H2A 0.977(5) . ?
C2S H2B 0.978(5) . ?
C2S H2C 0.978(5) . ?
N2S C3S 1.316(7) . ?
C3S C4S 1.250(8) . ?
C4S H4A 1.005(5) . ?
C4S H4B 1.004(5) . ?
C4S H4C 1.005(5) . ?
N3S C5S 1.159(9) . ?
C5S C6S 1.428(10) . ?
C6S H6A 0.978(5) . ?
C6S H6B 0.978(5) . ?
C6S H6C 0.978(5) . ?
C11 C16 1.384(4) . ?
C11 C12 1.400(4) . ?
C11 C33 1.499(4) . ?
C12 O12 1.393(4) . ?
C12 C13 1.398(4) . ?
O12 C57 1.430(4) . ?
C13 C14 1.395(4) . ?
C13 C51 1.517(4) . ?
C14 C15 1.387(4) . ?
C14 H14 0.9500 . ?
C15 C16 1.395(4) . ?
C15 C61 1.518(4) 8_665 ?
C16 O16 1.395(4) . ?
O16 C67 1.413(4) 8_665 ?
C21 C22 1.394(4) . ?
C21 C26 1.400(4) . ?
C21 C43 1.490(4) . ?
C22 O22 1.384(3) . ?
C22 C23 1.403(4) . ?
O22 C67 1.422(4) . ?
C23 C24 1.391(4) . ?
C23 C61 1.527(4) . ?
C24 C25 1.393(4) . ?
C24 H24 0.9500 . ?
C25 C26 1.390(4) . ?
C25 C51 1.535(4) . ?
C26 O26 1.394(3) . ?
O26 C57 1.411(4) . ?
N31 C36 1.317(6) . ?
N31 C32 1.325(4) . ?
C32 C33 1.375(4) . ?
C32 H32 0.9500 . ?
C33 C34 1.377(5) . ?
C34 C35 1.391(6) . ?
C34 H34 0.9500 . ?
C35 C36 1.370(7) . ?
C35 H35 0.9500 . ?
C36 H36 0.9500 . ?
N41 C46 1.335(4) . ?
N41 C42 1.338(4) . ?
C42 C43 1.397(4) . ?
C42 H42 0.9500 . ?
C43 C44 1.387(4) . ?
C44 C45 1.380(5) . ?
C44 H44 0.9500 . ?
C45 C46 1.380(5) . ?
C45 H45 0.9500 . ?
C46 H46 0.9500 . ?
C51 C52A 1.535(4) . ?
C51 H51 1.0000 . ?
C52A C53A 1.533(5) . ?
C52A H52A 0.9900 . ?
C52A H52B 0.9900 . ?
C53A C54A 1.540(5) . ?
C53A H53A 0.9900 . ?
C53A H53B 0.9900 . ?
C54A C55A 1.514(5) . ?
C54A H54A 0.9900 . ?
C54A H54B 0.9900 . ?
C55A C56A 1.527(5) . ?
C55A H55A 0.9900 . ?
C55A H55B 0.9900 . ?
C56A H56A 0.9800 . ?
C56A H56B 0.9800 . ?
C56A H56C 0.9800 . ?
C53B C54B 1.544(10) . ?
C53B H53C 0.9900 . ?
C53B H53D 0.9900 . ?
C54B C55B 1.539(10) . ?
C54B H54C 0.9900 . ?
C54B H54D 0.9900 . ?
C55B C56B 1.544(10) . ?
C55B H55C 0.9900 . ?
C55B H55D 0.9900 . ?
C56B H56D 0.9800 . ?
C56B H56E 0.9800 . ?
C56B H56F 0.9800 . ?
C57 H57A 0.9900 . ?
C57 H57B 0.9900 . ?
C61 C15 1.518(4) 8_665 ?
C61 C62 1.536(4) . ?
C61 H61 1.0000 . ?
C62 C63 1.527(5) . ?
C62 H62A 0.9900 . ?
C62 H62B 0.9900 . ?
C63 C64 1.521(5) . ?
C63 H63A 0.9900 . ?
C63 H63B 0.9900 . ?
C64 C65 1.520(5) . ?
C64 H64A 0.9900 . ?
C64 H64B 0.9900 . ?
C65 C66 1.529(5) . ?
C65 H65A 0.9900 . ?
C65 H65B 0.9900 . ?
C66 H66A 0.9800 . ?
C66 H66B 0.9800 . ?
C66 H66C 0.9800 . ?
C67 O16 1.413(4) 8_665 ?
C67 H67A 0.9900 . ?
C67 H67B 0.9900 . ?

loop_
 _geom_angle_atom_site_label_1
 _geom_angle_atom_site_label_2
 _geom_angle_atom_site_label_3
 _geom_angle
 _geom_angle_site_symmetry_1
 _geom_angle_site_symmetry_3
 _geom_angle_publ_flag
N1S C1S C2S 180.0(5) . . ?
C1S C2S H2A 108.6(10) . . ?
C1S C2S H2B 108.4(10) . . ?
H2A C2S H2B 110.5(11) . . ?
C1S C2S H2C 108.5(10) . . ?
H2A C2S H2C 110.5(11) . . ?
H2B C2S H2C 110.3(11) . . ?
C4S C3S N2S 176.1(7) . . ?
C3S C4S H4A 115.9(10) . . ?
C3S C4S H4B 116.5(10) . . ?
H4A C4S H4B 102.1(10) . . ?
C3S C4S H4C 115.7(10) . . ?
H4A C4S H4C 102.1(10) . . ?
H4B C4S H4C 102.3(10) . . ?
N3S C5S C6S 179.0(9) . . ?
C5S C6S H6A 108.9(10) . . ?
C5S C6S H6B 108.8(10) . . ?
H6A C6S H6B 110.2(12) . . ?
C5S C6S H6C 108.7(10) . . ?
H6A C6S H6C 110.0(11) . . ?
H6B C6S H6C 110.2(11) . . ?
C16 C11 C12 118.1(3) . . ?
C16 C11 C33 120.2(3) . . ?
C12 C11 C33 121.7(3) . . ?
O12 C12 C13 120.2(3) . . ?
O12 C12 C11 117.7(3) . . ?
C13 C12 C11 122.0(3) . . ?
C12 O12 C57 117.5(2) . . ?
C14 C13 C12 117.3(3) . . ?
C14 C13 C51 122.5(3) . . ?
C12 C13 C51 120.1(3) . . ?
C15 C14 C13 122.5(3) . . ?
C15 C14 H14 118.7 . . ?
C13 C14 H14 118.7 . . ?
C14 C15 C16 118.0(3) . . ?
C14 C15 C61 122.4(3) . 8_665 ?
C16 C15 C61 119.5(3) . 8_665 ?
C11 C16 C15 122.1(3) . . ?
C11 C16 O16 117.8(3) . . ?
C15 C16 O16 120.0(3) . . ?
C16 O16 C67 117.8(2) . 8_665 ?
C22 C21 C26 117.5(3) . . ?
C22 C21 C43 121.9(3) . . ?
C26 C21 C43 120.5(3) . . ?
O22 C22 C21 118.4(3) . . ?
O22 C22 C23 119.3(3) . . ?
C21 C22 C23 122.2(3) . . ?
C22 O22 C67 116.8(2) . . ?
C24 C23 C22 117.8(3) . . ?
C24 C23 C61 122.0(3) . . ?
C22 C23 C61 120.1(3) . . ?
C23 C24 C25 121.9(3) . . ?
C23 C24 H24 119.0 . . ?
C25 C24 H24 119.0 . . ?
C26 C25 C24 118.4(3) . . ?
C26 C25 C51 119.7(3) . . ?
C24 C25 C51 121.9(3) . . ?
C25 C26 O26 119.4(3) . . ?
C25 C26 C21 122.1(3) . . ?
O26 C26 C21 118.5(3) . . ?
C26 O26 C57 115.3(2) . . ?
C36 N31 C32 116.1(3) . . ?
N31 C32 C33 125.9(4) . . ?
N31 C32 H32 117.0 . . ?
C33 C32 H32 117.0 . . ?
C32 C33 C34 116.8(3) . . ?
C32 C33 C11 121.7(3) . . ?
C34 C33 C11 121.5(3) . . ?
C33 C34 C35 118.5(4) . . ?
C33 C34 H34 120.8 . . ?
C35 C34 H34 120.8 . . ?
C36 C35 C34 119.1(4) . . ?
C36 C35 H35 120.5 . . ?
C34 C35 H35 120.5 . . ?
N31 C36 C35 123.6(4) . . ?
N31 C36 H36 118.2 . . ?
C35 C36 H36 118.2 . . ?
C46 N41 C42 116.6(3) . . ?
N41 C42 C43 124.9(3) . . ?
N41 C42 H42 117.6 . . ?
C43 C42 H42 117.6 . . ?
C44 C43 C42 116.6(3) . . ?
C44 C43 C21 123.8(3) . . ?
C42 C43 C21 119.6(3) . . ?
C45 C44 C43 119.6(3) . . ?
C45 C44 H44 120.2 . . ?
C43 C44 H44 120.2 . . ?
C44 C45 C46 119.0(3) . . ?
C44 C45 H45 120.5 . . ?
C46 C45 H45 120.5 . . ?
N41 C46 C45 123.4(3) . . ?
N41 C46 H46 118.3 . . ?
C45 C46 H46 118.3 . . ?
C13 C51 C52A 113.6(3) . . ?
C13 C51 C25 107.6(2) . . ?
C52A C51 C25 113.8(2) . . ?
C13 C51 H51 107.1 . . ?
C52A C51 H51 107.1 . . ?
C25 C51 H51 107.1 . . ?
C53A C52A C51 112.9(3) . . ?
C53A C52A H52A 109.0 . . ?
C51 C52A H52A 109.0 . . ?
C53A C52A H52B 109.0 . . ?
C51 C52A H52B 109.0 . . ?
H52A C52A H52B 107.8 . . ?
C52A C53A C54A 113.4(3) . . ?
C52A C53A H53A 108.9 . . ?
C54A C53A H53A 108.9 . . ?
C52A C53A H53B 108.9 . . ?
C54A C53A H53B 108.9 . . ?
H53A C53A H53B 107.7 . . ?
C55A C54A C53A 114.4(3) . . ?
C55A C54A H54A 108.7 . . ?
C53A C54A H54A 108.7 . . ?
C55A C54A H54B 108.7 . . ?
C53A C54A H54B 108.7 . . ?
H54A C54A H54B 107.6 . . ?
C54A C55A C56A 113.0(3) . . ?
C54A C55A H55A 109.0 . . ?
C56A C55A H55A 109.0 . . ?
C54A C55A H55B 109.0 . . ?
C56A C55A H55B 109.0 . . ?
H55A C55A H55B 107.8 . . ?
C54B C53B H53C 109.7 . . ?
C54B C53B H53D 109.7 . . ?
H53C C53B H53D 108.2 . . ?
C55B C54B C53B 110.5(10) . . ?
C55B C54B H54C 109.5 . . ?
C53B C54B H54C 109.5 . . ?
C55B C54B H54D 109.5 . . ?
C53B C54B H54D 109.5 . . ?
H54C C54B H54D 108.1 . . ?
C54B C55B C56B 110.1(10) . . ?
C54B C55B H55C 109.6 . . ?
C56B C55B H55C 109.6 . . ?
C54B C55B H55D 109.6 . . ?
C56B C55B H55D 109.6 . . ?
H55C C55B H55D 108.1 . . ?
C55B C56B H56D 109.5 . . ?
C55B C56B H56E 109.5 . . ?
H56D C56B H56E 109.5 . . ?
C55B C56B H56F 109.5 . . ?
H56D C56B H56F 109.5 . . ?
H56E C56B H56F 109.5 . . ?
O26 C57 O12 112.4(2) . . ?
O26 C57 H57A 109.1 . . ?
O12 C57 H57A 109.1 . . ?
O26 C57 H57B 109.1 . . ?
O12 C57 H57B 109.1 . . ?
H57A C57 H57B 107.9 . . ?
C15 C61 C23 108.3(2) 8_665 . ?
C15 C61 C62 112.7(3) 8_665 . ?
C23 C61 C62 114.1(2) . . ?
C15 C61 H61 107.1 8_665 . ?
C23 C61 H61 107.1 . . ?
C62 C61 H61 107.1 . . ?
C63 C62 C61 113.6(3) . . ?
C63 C62 H62A 108.9 . . ?
C61 C62 H62A 108.9 . . ?
C63 C62 H62B 108.9 . . ?
C61 C62 H62B 108.9 . . ?
H62A C62 H62B 107.7 . . ?
C64 C63 C62 112.3(3) . . ?
C64 C63 H63A 109.1 . . ?
C62 C63 H63A 109.1 . . ?
C64 C63 H63B 109.1 . . ?
C62 C63 H63B 109.1 . . ?
H63A C63 H63B 107.9 . . ?
C65 C64 C63 114.0(3) . . ?
C65 C64 H64A 108.7 . . ?
C63 C64 H64A 108.7 . . ?
C65 C64 H64B 108.7 . . ?
C63 C64 H64B 108.7 . . ?
H64A C64 H64B 107.6 . . ?
C64 C65 C66 112.7(3) . . ?
C64 C65 H65A 109.0 . . ?
C66 C65 H65A 109.0 . . ?
C64 C65 H65B 109.0 . . ?
C66 C65 H65B 109.0 . . ?
H65A C65 H65B 107.8 . . ?
C65 C66 H66A 109.5 . . ?
C65 C66 H66B 109.5 . . ?
H66A C66 H66B 109.5 . . ?
C65 C66 H66C 109.5 . . ?
H66A C66 H66C 109.5 . . ?
H66B C66 H66C 109.5 . . ?
O16 C67 O22 113.5(2) 8_665 . ?
O16 C67 H67A 108.9 8_665 . ?
O22 C67 H67A 108.9 . . ?
O16 C67 H67B 108.9 8_665 . ?
O22 C67 H67B 108.9 . . ?
H67A C67 H67B 107.7 . . ?

loop_
 _geom_torsion_atom_site_label_1
 _geom_torsion_atom_site_label_2
 _geom_torsion_atom_site_label_3
 _geom_torsion_atom_site_label_4
 _geom_torsion
 _geom_torsion_site_symmetry_1
 _geom_torsion_site_symmetry_2
 _geom_torsion_site_symmetry_3
 _geom_torsion_site_symmetry_4
 _geom_torsion_publ_flag
C16 C11 C12 O12 174.7(2) . . . . ?
C33 C11 C12 O12 -6.5(4) . . . . ?
C16 C11 C12 C13 -1.3(4) . . . . ?
C33 C11 C12 C13 177.5(3) . . . . ?
C13 C12 O12 C57 -82.1(3) . . . . ?
C11 C12 O12 C57 101.8(3) . . . . ?
O12 C12 C13 C14 -175.4(2) . . . . ?
C11 C12 C13 C14 0.5(4) . . . . ?
O12 C12 C13 C51 7.7(4) . . . . ?
C11 C12 C13 C51 -176.4(2) . . . . ?
C12 C13 C14 C15 0.8(4) . . . . ?
C51 C13 C14 C15 177.7(3) . . . . ?
C13 C14 C15 C16 -1.4(4) . . . . ?
C13 C14 C15 C61 -179.2(3) . . . 8_665 ?
C12 C11 C16 C15 0.7(4) . . . . ?
C33 C11 C16 C15 -178.1(3) . . . . ?
C12 C11 C16 O16 -175.4(2) . . . . ?
C33 C11 C16 O16 5.8(4) . . . . ?
C14 C15 C16 C11 0.6(4) . . . . ?
C61 C15 C16 C11 178.5(3) 8_665 . . . ?
C14 C15 C16 O16 176.6(2) . . . . ?
C61 C15 C16 O16 -5.5(4) 8_665 . . . ?
C11 C16 O16 C67 -102.4(3) . . . 8_665 ?
C15 C16 O16 C67 81.4(3) . . . 8_665 ?
C26 C21 C22 O22 178.6(3) . . . . ?
C43 C21 C22 O22 1.8(4) . . . . ?
C26 C21 C22 C23 2.8(4) . . . . ?
C43 C21 C22 C23 -174.1(3) . . . . ?
C21 C22 O22 C67 102.7(3) . . . . ?
C23 C22 O22 C67 -81.3(3) . . . . ?
O22 C22 C23 C24 -179.1(3) . . . . ?
C21 C22 C23 C24 -3.3(4) . . . . ?
O22 C22 C23 C61 4.0(4) . . . . ?
C21 C22 C23 C61 179.8(3) . . . . ?
C22 C23 C24 C25 1.9(4) . . . . ?
C61 C23 C24 C25 178.7(3) . . . . ?
C23 C24 C25 C26 0.0(4) . . . . ?
C23 C24 C25 C51 -176.8(3) . . . . ?
C24 C25 C26 O26 178.1(3) . . . . ?
C51 C25 C26 O26 -5.0(4) . . . . ?
C24 C25 C26 C21 -0.6(4) . . . . ?
C51 C25 C26 C21 176.3(3) . . . . ?
C22 C21 C26 C25 -0.8(4) . . . . ?
C43 C21 C26 C25 176.1(3) . . . . ?
C22 C21 C26 O26 -179.5(3) . . . . ?
C43 C21 C26 O26 -2.6(4) . . . . ?
C25 C26 O26 C57 84.7(3) . . . . ?
C21 C26 O26 C57 -96.5(3) . . . . ?
C36 N31 C32 C33 1.7(6) . . . . ?
N31 C32 C33 C34 -2.3(6) . . . . ?
N31 C32 C33 C11 176.3(3) . . . . ?
C16 C11 C33 C32 -84.6(4) . . . . ?
C12 C11 C33 C32 96.6(4) . . . . ?
C16 C11 C33 C34 93.8(4) . . . . ?
C12 C11 C33 C34 -84.9(4) . . . . ?
C32 C33 C34 C35 0.9(6) . . . . ?
C11 C33 C34 C35 -177.6(4) . . . . ?
C33 C34 C35 C36 0.7(7) . . . . ?
C32 N31 C36 C35 0.2(6) . . . . ?
C34 C35 C36 N31 -1.3(7) . . . . ?
C46 N41 C42 C43 -0.2(5) . . . . ?
N41 C42 C43 C44 0.6(5) . . . . ?
N41 C42 C43 C21 -179.2(3) . . . . ?
C22 C21 C43 C44 -56.0(4) . . . . ?
C26 C21 C43 C44 127.3(3) . . . . ?
C22 C21 C43 C42 123.8(3) . . . . ?
C26 C21 C43 C42 -53.0(4) . . . . ?
C42 C43 C44 C45 -1.1(4) . . . . ?
C21 C43 C44 C45 178.6(3) . . . . ?
C43 C44 C45 C46 1.2(5) . . . . ?
C42 N41 C46 C45 0.3(5) . . . . ?
C44 C45 C46 N41 -0.9(5) . . . . ?
C14 C13 C51 C52A 33.2(4) . . . . ?
C12 C13 C51 C52A -150.0(3) . . . . ?
C14 C13 C51 C25 -93.7(3) . . . . ?
C12 C13 C51 C25 83.1(3) . . . . ?
C26 C25 C51 C13 -86.5(3) . . . . ?
C24 C25 C51 C13 90.2(3) . . . . ?
C26 C25 C51 C52A 146.6(3) . . . . ?
C24 C25 C51 C52A -36.6(4) . . . . ?
C13 C51 C52A C53A 178.3(3) . . . . ?
C25 C51 C52A C53A -58.0(3) . . . . ?
C51 C52A C53A C54A -173.9(3) . . . . ?
C52A C53A C54A C55A 71.4(4) . . . . ?
C53A C54A C55A C56A -178.9(3) . . . . ?
C53B C54B C55B C56B 178(3) . . . . ?
C26 O26 C57 O12 -94.1(3) . . . . ?
C12 O12 C57 O26 91.3(3) . . . . ?
C24 C23 C61 C15 -89.8(3) . . . 8_665 ?
C22 C23 C61 C15 87.0(3) . . . 8_665 ?
C24 C23 C61 C62 36.6(4) . . . . ?
C22 C23 C61 C62 -146.6(3) . . . . ?
C15 C61 C62 C63 -164.7(2) 8_665 . . . ?
C23 C61 C62 C63 71.3(3) . . . . ?
C61 C62 C63 C64 178.0(3) . . . . ?
C62 C63 C64 C65 75.5(4) . . . . ?
C63 C64 C65 C66 -176.5(3) . . . . ?
C22 O22 C67 O16 92.8(3) . . . 8_665 ?

_diffrn_measured_fraction_theta_max    0.978
_diffrn_reflns_theta_full              28.31
_diffrn_measured_fraction_theta_full   0.978
_refine_diff_density_max    0.362
_refine_diff_density_min   -0.219
_refine_diff_density_rms    0.049


#END


data_2b

_audit_creation_method            SHELXL-97
_chemical_name_systematic
;
NS 14 pentyl calixarene (+ octanedioic acid)
;
_chemical_name_common             ?
_chemical_melting_point           ?
_chemical_formula_moiety
;
(C72 H76 N4 O8)2 (C H4 O)7
;
_chemical_formula_sum
 'C151 H180 N8 O23'
_chemical_formula_weight          2475.03

loop_
 _atom_type_symbol
 _atom_type_description
 _atom_type_scat_dispersion_real
 _atom_type_scat_dispersion_imag
 _atom_type_scat_source
 'C'  'C'   0.0033   0.0016
 'International Tables Vol C Tables 4.2.6.8 and 6.1.1.4'
 'H'  'H'   0.0000   0.0000
 'International Tables Vol C Tables 4.2.6.8 and 6.1.1.4'
 'N'  'N'   0.0061   0.0033
 'International Tables Vol C Tables 4.2.6.8 and 6.1.1.4'
 'O'  'O'   0.0106   0.0060
 'International Tables Vol C Tables 4.2.6.8 and 6.1.1.4'

_symmetry_cell_setting            Monoclinic
_symmetry_space_group_name_H-M    P2(1)/n

loop_
 _symmetry_equiv_pos_as_xyz
 'x, y, z'
 '-x+1/2, y+1/2, -z+1/2'
 '-x, -y, -z'
 'x-1/2, -y-1/2, z-1/2'

_cell_length_a                    23.3560(16)
_cell_length_b                    22.1519(16)
_cell_length_c                    25.5165(16)
_cell_angle_alpha                 90.00
_cell_angle_beta                  94.302(4)
_cell_angle_gamma                 90.00
_cell_volume                      13164.5(15)
_cell_formula_units_Z             4
_cell_measurement_temperature     153(2)
_cell_measurement_reflns_used     3644
_cell_measurement_theta_min       2.20
_cell_measurement_theta_max       24.00

_exptl_crystal_description        plate
_exptl_crystal_colour             colorless
_exptl_crystal_size_max           0.45
_exptl_crystal_size_mid           0.25
_exptl_crystal_size_min           0.10
_exptl_crystal_density_meas       ?
_exptl_crystal_density_diffrn     1.249
_exptl_crystal_density_method     'not measured'
_exptl_crystal_F_000              5304
_exptl_absorpt_coefficient_mu     0.084
_exptl_absorpt_correction_type    none
_exptl_absorpt_correction_T_min   ?
_exptl_absorpt_correction_T_max   ?
_exptl_absorpt_process_details    ?

_exptl_special_details
;
 ?
;

_diffrn_ambient_temperature       153(2)
_diffrn_radiation_wavelength      0.71073
_diffrn_radiation_type            MoK\a
_diffrn_radiation_source          'fine-focus sealed tube'
_diffrn_radiation_monochromator   graphite
_diffrn_measurement_device_type   'CCD area detector'
_diffrn_measurement_method        'phi and omega scans'
_diffrn_detector_area_resol_mean  ?
_diffrn_standards_number          ?
_diffrn_standards_interval_count  ?
_diffrn_standards_interval_time   ?
_diffrn_standards_decay_%         ?
_diffrn_reflns_number             59710
_diffrn_reflns_av_R_equivalents   0.1700
_diffrn_reflns_av_sigmaI/netI     0.2689
_diffrn_reflns_limit_h_min        -26
_diffrn_reflns_limit_h_max        14
_diffrn_reflns_limit_k_min        -27
_diffrn_reflns_limit_k_max        27
_diffrn_reflns_limit_l_min        -28
_diffrn_reflns_limit_l_max        31
_diffrn_reflns_theta_min          1.23
_diffrn_reflns_theta_max          26.48
_reflns_number_total              24481
_reflns_number_gt                 8691
_reflns_threshold_expression      >2sigma(I)

_computing_data_collection        'Bruker XSCANS'
_computing_cell_refinement        'Bruker XSCANS'
_computing_data_reduction         'Bruker SHELXTL'
_computing_structure_solution     'SHELXS-97 (Sheldrick, 1990)'
_computing_structure_refinement   'SHELXL-97 (Sheldrick, 1997)'
_computing_molecular_graphics     'Bruker SHELXTL'
_computing_publication_material   'Bruker SHELXTL'

_refine_special_details
;
 Refinement of F^2^ against ALL reflections.  The weighted R-factor wR and
 goodness of fit S are based on F^2^, conventional R-factors R are based
 on F, with F set to zero for negative F^2^. The threshold expression of
 F^2^ > 2sigma(F^2^) is used only for calculating R-factors(gt) etc. and is
 not relevant to the choice of reflections for refinement.  R-factors based
 on F^2^ are statistically about twice as large as those based on F, and R-
 factors based on ALL data will be even larger.
;

_refine_ls_structure_factor_coef  Fsqd
_refine_ls_matrix_type            full
_refine_ls_weighting_scheme       calc
_refine_ls_weighting_details
 'calc w=1/[\s^2^(Fo^2^)+(0.1000P)^2^+0.0000P] where P=(Fo^2^+2Fc^2^)/3'
_atom_sites_solution_primary      direct
_atom_sites_solution_secondary    difmap
_atom_sites_solution_hydrogens    geom
_refine_ls_hydrogen_treatment     constr
_refine_ls_extinction_method      none
_refine_ls_extinction_coef        ?
_refine_ls_number_reflns          24481
_refine_ls_number_parameters      1638
_refine_ls_number_restraints      254
_refine_ls_R_factor_all           0.2531
_refine_ls_R_factor_gt            0.0929
_refine_ls_wR_factor_ref          0.2680
_refine_ls_wR_factor_gt           0.2051
_refine_ls_goodness_of_fit_ref    0.957
_refine_ls_restrained_S_all       0.969
_refine_ls_shift/su_max           0.001
_refine_ls_shift/su_mean          0.000

loop_
 _atom_site_label
 _atom_site_type_symbol
 _atom_site_fract_x
 _atom_site_fract_y
 _atom_site_fract_z
 _atom_site_U_iso_or_equiv
 _atom_site_adp_type
 _atom_site_occupancy
 _atom_site_symmetry_multiplicity
 _atom_site_calc_flag
 _atom_site_refinement_flags
 _atom_site_disorder_assembly
 _atom_site_disorder_group
C1S C 0.9716(3) 0.2510(3) -0.0083(3) 0.063(2) Uani 1 1 d . . .
H1A H 1.0006 0.2342 0.0173 0.094 Uiso 1 1 calc R . .
H1B H 0.9817 0.2412 -0.0439 0.094 Uiso 1 1 calc R . .
H1C H 0.9340 0.2337 -0.0026 0.094 Uiso 1 1 calc R . .
O1S O 0.9694(2) 0.3137(2) -0.00238(17) 0.0751(17) Uani 1 1 d . . .
H1 H 0.9709 0.3223 0.0297 0.090 Uiso 1 1 calc R . .
C2S C 0.8170(3) 0.3404(3) 0.0378(3) 0.073(2) Uani 1 1 d . . .
H2A H 0.7877 0.3453 0.0085 0.110 Uiso 1 1 calc R . .
H2B H 0.8035 0.3111 0.0629 0.110 Uiso 1 1 calc R . .
H2C H 0.8527 0.3258 0.0243 0.110 Uiso 1 1 calc R . .
O2S O 0.8270(2) 0.3960(2) 0.06290(17) 0.0630(14) Uani 1 1 d . . .
H2 H 0.7987 0.4050 0.0798 0.076 Uiso 1 1 calc R . .
C3S C 0.7633(3) 0.4272(3) 0.1755(2) 0.0467(18) Uani 1 1 d . . .
H3A H 0.7524 0.3845 0.1765 0.070 Uiso 1 1 calc R . .
H3B H 0.7413 0.4501 0.2000 0.070 Uiso 1 1 calc R . .
H3C H 0.8044 0.4312 0.1857 0.070 Uiso 1 1 calc R . .
O3S O 0.7516(2) 0.4496(2) 0.1247(2) 0.097(2) Uani 1 1 d . . .
H3 H 0.7170 0.4430 0.1149 0.116 Uiso 1 1 calc R . .
C4S C 0.4703(4) 0.7347(4) -0.0148(3) 0.094(3) Uani 1 1 d . . .
H4A H 0.4876 0.7575 0.0153 0.140 Uiso 1 1 calc R . .
H4B H 0.4435 0.7607 -0.0358 0.140 Uiso 1 1 calc R . .
H4C H 0.5005 0.7207 -0.0365 0.140 Uiso 1 1 calc R . .
O4S O 0.4407(3) 0.6849(2) 0.0034(2) 0.102(2) Uani 1 1 d . . .
H4 H 0.4630 0.6551 0.0064 0.123 Uiso 1 1 calc R . .
C5S C 0.2659(3) 0.6030(3) 0.1776(3) 0.063(2) Uani 1 1 d . . .
H5A H 0.2939 0.5707 0.1739 0.095 Uiso 1 1 calc R . .
H5B H 0.2286 0.5854 0.1841 0.095 Uiso 1 1 calc R . .
H5C H 0.2789 0.6291 0.2071 0.095 Uiso 1 1 calc R . .
O5S O 0.2605(3) 0.6367(3) 0.1320(3) 0.132(3) Uani 1 1 d . . .
H5 H 0.2407 0.6175 0.1087 0.158 Uiso 1 1 calc R . .
C6S C 0.7644(3) 0.5685(4) 0.0015(3) 0.081(3) Uani 1 1 d . . .
H6A H 0.7739 0.5354 0.0261 0.121 Uiso 1 1 calc R . .
H6B H 0.7515 0.6036 0.0208 0.121 Uiso 1 1 calc R . .
H6C H 0.7985 0.5793 -0.0166 0.121 Uiso 1 1 calc R . .
O6S O 0.7203(3) 0.5499(3) -0.0357(2) 0.114(2) Uani 1 1 d . . .
H6 H 0.7053 0.5803 -0.0508 0.137 Uiso 1 1 calc R . .
C7A C 0.6765(7) 0.4000(7) -0.0177(6) 0.104(3) Uiso 0.628(8) 1 d PD A 1
H7A H 0.6418 0.4250 -0.0195 0.156 Uiso 0.628(8) 1 calc PR A 1
H7B H 0.6937 0.3994 0.0185 0.156 Uiso 0.628(8) 1 calc PR A 1
H7C H 0.6663 0.3587 -0.0287 0.156 Uiso 0.628(8) 1 calc PR A 1
O7A O 0.7166(4) 0.4244(4) -0.0516(4) 0.104(3) Uiso 0.628(8) 1 d PD A 1
H7D H 0.7011 0.4527 -0.0694 0.125 Uiso 0.628(8) 1 calc PR A 1
C7B C 0.6790(11) 0.3441(9) -0.0547(9) 0.104(3) Uiso 0.372(8) 1 d PD A 2
H7E H 0.7197 0.3417 -0.0422 0.156 Uiso 0.372(8) 1 calc PR A 2
H7F H 0.6749 0.3367 -0.0927 0.156 Uiso 0.372(8) 1 calc PR A 2
H7G H 0.6573 0.3136 -0.0367 0.156 Uiso 0.372(8) 1 calc PR A 2
O7B O 0.6573(8) 0.4030(8) -0.0438(7) 0.104(3) Uiso 0.372(8) 1 d PD A 2
H7H H 0.6786 0.4294 -0.0559 0.125 Uiso 0.372(8) 1 calc PR A 2
C11_1 C 0.3399(2) 0.4329(2) 0.2306(2) 0.0226(13) Uani 1 1 d . . .
C12_1 C 0.3675(2) 0.4719(2) 0.2667(2) 0.0258(14) Uani 1 1 d . . .
O12_1 O 0.42686(16) 0.47678(14) 0.26606(13) 0.0269(9) Uani 1 1 d . . .
C13_1 C 0.3395(2) 0.5032(2) 0.3036(2) 0.0239(14) Uani 1 1 d . . .
C14_1 C 0.2809(2) 0.4942(2) 0.3044(2) 0.0242(13) Uani 1 1 d . . .
H14_1 H 0.2608 0.5143 0.3303 0.029 Uiso 1 1 calc R . .
C15_1 C 0.2507(2) 0.4567(2) 0.2684(2) 0.0230(13) Uani 1 1 d . . .
C16_1 C 0.2807(3) 0.4282(2) 0.2305(2) 0.0260(14) Uani 1 1 d . . .
O16_1 O 0.25207(15) 0.39218(14) 0.19304(13) 0.0263(9) Uani 1 1 d . . .
C21_1 C 0.1159(2) 0.5248(2) 0.1506(2) 0.0294(14) Uani 1 1 d . . .
C22_1 C 0.1438(2) 0.4824(2) 0.1832(2) 0.0290(15) Uani 1 1 d . . .
O22_1 O 0.16085(17) 0.42833(15) 0.16137(14) 0.0305(10) Uani 1 1 d . . .
C23_1 C 0.1549(2) 0.4929(2) 0.2365(2) 0.0245(14) Uani 1 1 d . . .
C24_1 C 0.1384(2) 0.5484(2) 0.2556(2) 0.0275(14) Uani 1 1 d . . .
H24_1 H 0.1465 0.5565 0.2920 0.033 Uiso 1 1 calc R . .
C25_1 C 0.1110(2) 0.5925(2) 0.2251(2) 0.0258(14) Uani 1 1 d . . .
C26_1 C 0.0993(2) 0.5795(2) 0.1719(2) 0.0317(15) Uani 1 1 d . . .
O26_1 O 0.06951(16) 0.61916(16) 0.13930(15) 0.0353(11) Uani 1 1 d . . .
C31_1 C 0.1887(2) 0.7656(2) 0.1744(2) 0.0260(14) Uani 1 1 d . . .
C32_1 C 0.1444(2) 0.7272(2) 0.1873(2) 0.0283(14) Uani 1 1 d . . .
O32_1 O 0.09815(16) 0.72019(15) 0.15014(15) 0.0343(10) Uani 1 1 d . . .
C33_1 C 0.1443(2) 0.6979(2) 0.2345(2) 0.0263(14) Uani 1 1 d . . .
C34_1 C 0.1903(2) 0.7084(2) 0.2712(2) 0.0283(14) Uani 1 1 d . . .
H34_1 H 0.1905 0.6892 0.3045 0.034 Uiso 1 1 calc R . .
C35_1 C 0.2358(2) 0.7457(2) 0.2612(2) 0.0230(13) Uani 1 1 d . . .
C36_1 C 0.2342(2) 0.7725(2) 0.2119(2) 0.0259(14) Uani 1 1 d . . .
O36_1 O 0.28044(16) 0.80767(15) 0.19870(14) 0.0270(9) Uani 1 1 d . . .
C41_1 C 0.4109(2) 0.6694(2) 0.2431(2) 0.0257(14) Uani 1 1 d . . .
C42_1 C 0.3691(2) 0.7123(2) 0.2517(2) 0.0238(13) Uani 1 1 d . . .
O42_1 O 0.37047(15) 0.76513(14) 0.22270(14) 0.0258(9) Uani 1 1 d . . .
C43_1 C 0.3304(2) 0.7052(2) 0.2897(2) 0.0214(13) Uani 1 1 d . . .
C44_1 C 0.3326(2) 0.6518(2) 0.3175(2) 0.0242(13) Uani 1 1 d . . .
H44_1 H 0.3048 0.6453 0.3422 0.029 Uiso 1 1 calc R . .
C45_1 C 0.3726(2) 0.6074(2) 0.3115(2) 0.0216(13) Uani 1 1 d . . .
C46_1 C 0.4122(2) 0.6174(2) 0.2750(2) 0.0229(13) Uani 1 1 d . . .
O46_1 O 0.45774(15) 0.57758(14) 0.26993(13) 0.0243(9) Uani 1 1 d . . .
C51_1 C 0.3719(2) 0.5475(2) 0.3403(2) 0.0246(14) Uani 1 1 d . . .
H51_1 H 0.4125 0.5330 0.3454 0.029 Uiso 1 1 calc R . .
C52_1 C 0.3484(2) 0.5501(2) 0.3945(2) 0.0256(14) Uani 1 1 d . . .
H52A_1 H 0.3100 0.5693 0.3913 0.031 Uiso 1 1 calc R . .
H52B_1 H 0.3438 0.5085 0.4076 0.031 Uiso 1 1 calc R . .
C53_1 C 0.3869(3) 0.5851(2) 0.4342(2) 0.0354(15) Uani 1 1 d . . .
H53A_1 H 0.4227 0.5620 0.4424 0.042 Uiso 1 1 calc R . .
H53B_1 H 0.3973 0.6241 0.4185 0.042 Uiso 1 1 calc R . .
C54_1 C 0.3586(3) 0.5971(3) 0.4846(2) 0.0381(16) Uani 1 1 d . . .
H54A_1 H 0.3858 0.6203 0.5085 0.046 Uiso 1 1 calc R . .
H54B_1 H 0.3246 0.6230 0.4763 0.046 Uiso 1 1 calc R . .
C55_1 C 0.3398(3) 0.5423(3) 0.5137(2) 0.0477(18) Uani 1 1 d . . .
H55A_1 H 0.3737 0.5171 0.5241 0.057 Uiso 1 1 calc R . .
H55B_1 H 0.3133 0.5180 0.4901 0.057 Uiso 1 1 calc R . .
C56_1 C 0.3098(3) 0.5593(3) 0.5625(2) 0.061(2) Uani 1 1 d . . .
H56A_1 H 0.2968 0.5225 0.5795 0.092 Uiso 1 1 calc R . .
H56B_1 H 0.2766 0.5850 0.5525 0.092 Uiso 1 1 calc R . .
H56C_1 H 0.3366 0.5812 0.5871 0.092 Uiso 1 1 calc R . .
C57_1 C 0.4472(2) 0.5264(2) 0.2382(2) 0.0292(14) Uani 1 1 d . . .
H57A_1 H 0.4832 0.5147 0.2226 0.035 Uiso 1 1 calc R . .
H57B_1 H 0.4185 0.5368 0.2090 0.035 Uiso 1 1 calc R . .
C61_1 C 0.1865(2) 0.4463(2) 0.2703(2) 0.0258(14) Uani 1 1 d . . .
H61_1 H 0.1778 0.4062 0.2536 0.031 Uiso 1 1 calc R . .
C62_1 C 0.1683(2) 0.4429(2) 0.3260(2) 0.0281(14) Uani 1 1 d . . .
H62A_1 H 0.1940 0.4144 0.3463 0.034 Uiso 1 1 calc R . .
H62B_1 H 0.1733 0.4832 0.3425 0.034 Uiso 1 1 calc R . .
C63_1 C 0.1070(2) 0.4228(2) 0.3292(2) 0.0327(15) Uani 1 1 d . . .
H63A_1 H 0.1017 0.3826 0.3126 0.039 Uiso 1 1 calc R . .
H63B_1 H 0.0811 0.4515 0.3093 0.039 Uiso 1 1 calc R . .
C64_1 C 0.0905(3) 0.4194(3) 0.3856(2) 0.0481(18) Uani 1 1 d . . .
H64A_1 H 0.1176 0.3919 0.4053 0.058 Uiso 1 1 calc R . .
H64B_1 H 0.0955 0.4600 0.4015 0.058 Uiso 1 1 calc R . .
C65_1 C 0.0308(3) 0.3986(3) 0.3928(3) 0.058(2) Uani 1 1 d . . .
H65A_1 H 0.0221 0.4061 0.4296 0.070 Uiso 1 1 calc R . .
H65B_1 H 0.0035 0.4225 0.3696 0.070 Uiso 1 1 calc R . .
C66_1 C 0.0224(3) 0.3342(3) 0.3808(3) 0.074(2) Uani 1 1 d . . .
H66A_1 H -0.0154 0.3215 0.3911 0.111 Uiso 1 1 calc R . .
H66B_1 H 0.0523 0.3105 0.4003 0.111 Uiso 1 1 calc R . .
H66C_1 H 0.0245 0.3276 0.3430 0.111 Uiso 1 1 calc R . .
C67_1 C 0.2187(3) 0.4225(2) 0.1526(2) 0.0335(15) Uani 1 1 d . . .
H67A_1 H 0.2351 0.4632 0.1482 0.040 Uiso 1 1 calc R . .
H67B_1 H 0.2219 0.4003 0.1193 0.040 Uiso 1 1 calc R . .
C71_1 C 0.0968(2) 0.6540(2) 0.2459(2) 0.0289(15) Uani 1 1 d . . .
H71_1 H 0.0609 0.6680 0.2257 0.035 Uiso 1 1 calc R . .
C72_1 C 0.0849(2) 0.6534(2) 0.3040(2) 0.0311(15) Uani 1 1 d . . .
H72A_1 H 0.1186 0.6356 0.3242 0.037 Uiso 1 1 calc R . .
H72B_1 H 0.0814 0.6957 0.3159 0.037 Uiso 1 1 calc R . .
C73_1 C 0.0325(3) 0.6197(3) 0.3176(3) 0.0464(18) Uani 1 1 d . . .
H73A_1 H 0.0355 0.5771 0.3064 0.056 Uiso 1 1 calc R . .
H73B_1 H -0.0018 0.6375 0.2983 0.056 Uiso 1 1 calc R . .
C74_1 C 0.0251(3) 0.6219(3) 0.3769(3) 0.057(2) Uani 1 1 d . . .
H74A_1 H 0.0607 0.6067 0.3958 0.068 Uiso 1 1 calc R . .
H74B_1 H 0.0205 0.6646 0.3873 0.068 Uiso 1 1 calc R . .
C75_1 C -0.0225(4) 0.5882(4) 0.3943(3) 0.079(3) Uani 1 1 d . . .
H75A_1 H -0.0194 0.5460 0.3821 0.094 Uiso 1 1 calc R . .
H75B_1 H -0.0585 0.6052 0.3774 0.094 Uiso 1 1 calc R . .
C76_1 C -0.0267(4) 0.5878(3) 0.4531(3) 0.082(3) Uani 1 1 d . . .
H76A_1 H -0.0632 0.5694 0.4612 0.123 Uiso 1 1 calc R . .
H76B_1 H -0.0249 0.6293 0.4664 0.123 Uiso 1 1 calc R . .
H76C_1 H 0.0052 0.5644 0.4699 0.123 Uiso 1 1 calc R . .
C77_1 C 0.0998(3) 0.6675(2) 0.1192(2) 0.0383(16) Uani 1 1 d . . .
H77A_1 H 0.0833 0.6767 0.0832 0.046 Uiso 1 1 calc R . .
H77B_1 H 0.1403 0.6554 0.1169 0.046 Uiso 1 1 calc R . .
C81_1 C 0.2871(2) 0.7543(2) 0.2994(2) 0.0244(13) Uani 1 1 d . . .
H81_1 H 0.3050 0.7938 0.2910 0.029 Uiso 1 1 calc R . .
C82_1 C 0.2715(2) 0.7576(2) 0.3565(2) 0.0288(14) Uani 1 1 d . . .
H82A_1 H 0.2425 0.7898 0.3596 0.035 Uiso 1 1 calc R . .
H82B_1 H 0.2536 0.7189 0.3658 0.035 Uiso 1 1 calc R . .
C83_1 C 0.3224(2) 0.7700(2) 0.3954(2) 0.0327(15) Uani 1 1 d . . .
H83A_1 H 0.3369 0.8112 0.3892 0.039 Uiso 1 1 calc R . .
H83B_1 H 0.3535 0.7412 0.3890 0.039 Uiso 1 1 calc R . .
C84_1 C 0.3084(3) 0.7649(3) 0.4525(2) 0.0411(17) Uani 1 1 d . . .
H84A_1 H 0.2862 0.7274 0.4570 0.049 Uiso 1 1 calc R . .
H84B_1 H 0.2839 0.7994 0.4612 0.049 Uiso 1 1 calc R . .
C85_1 C 0.3626(3) 0.7639(3) 0.4911(2) 0.054(2) Uani 1 1 d . . .
H85A_1 H 0.3899 0.7336 0.4792 0.065 Uiso 1 1 calc R . .
H85B_1 H 0.3815 0.8039 0.4909 0.065 Uiso 1 1 calc R . .
C86_1 C 0.3481(3) 0.7490(3) 0.5464(3) 0.070(2) Uani 1 1 d . . .
H86A_1 H 0.3835 0.7395 0.5680 0.105 Uiso 1 1 calc R . .
H86B_1 H 0.3223 0.7141 0.5456 0.105 Uiso 1 1 calc R . .
H86C_1 H 0.3293 0.7838 0.5615 0.105 Uiso 1 1 calc R . .
C87_1 C 0.3267(2) 0.7736(2) 0.1820(2) 0.0266(14) Uani 1 1 d . . .
H87A_1 H 0.3430 0.7946 0.1522 0.032 Uiso 1 1 calc R . .
H87B_1 H 0.3124 0.7338 0.1693 0.032 Uiso 1 1 calc R . .
N111_1 N 0.4450(3) 0.3197(3) 0.1867(4) 0.091(3) Uani 1 1 d . . .
C112_1 C 0.4086(3) 0.3518(2) 0.2186(3) 0.0405(17) Uani 1 1 d . . .
H112_1 H 0.4081 0.3428 0.2549 0.049 Uiso 1 1 calc R . .
C113_1 C 0.3739(2) 0.3965(2) 0.1960(2) 0.0287(14) Uani 1 1 d . . .
C114_1 C 0.3746(3) 0.4052(3) 0.1430(3) 0.056(2) Uani 1 1 d . . .
H114_1 H 0.3498 0.4349 0.1269 0.067 Uiso 1 1 calc R . .
C115_1 C 0.4081(4) 0.3744(4) 0.1131(3) 0.060(2) Uani 1 1 d . . .
H115_1 H 0.4069 0.3816 0.0764 0.072 Uiso 1 1 calc R . .
C116_1 C 0.4420(4) 0.3351(4) 0.1343(4) 0.078(3) Uani 1 1 d . . .
H116_1 H 0.4670 0.3149 0.1125 0.094 Uiso 1 1 calc R . .
N121_1 N 0.1198(2) 0.5329(2) 0.0035(2) 0.0525(16) Uani 1 1 d D . .
C122_1 C 0.1295(3) 0.5419(3) 0.0558(2) 0.0468(18) Uani 1 1 d D . .
H122_1 H 0.1562 0.5726 0.0668 0.056 Uiso 1 1 calc R . .
C123_1 C 0.1044(3) 0.5108(2) 0.0942(2) 0.0353(16) Uani 1 1 d D . .
C124_1 C 0.0653(3) 0.4662(3) 0.0773(2) 0.052(2) Uani 1 1 d D . .
H124_1 H 0.0455 0.4442 0.1023 0.062 Uiso 1 1 calc R . .
C125_1 C 0.0553(3) 0.4542(3) 0.0249(3) 0.061(2) Uani 1 1 d D . .
H125_1 H 0.0300 0.4225 0.0134 0.073 Uiso 1 1 calc R . .
C126_1 C 0.0817(3) 0.4877(3) -0.0103(3) 0.057(2) Uani 1 1 d D . .
H126_1 H 0.0733 0.4795 -0.0466 0.068 Uiso 1 1 calc R . .
N131_1 N 0.1832(2) 0.8940(2) 0.07976(19) 0.0474(15) Uani 1 1 d D . .
C132_1 C 0.1821(2) 0.8602(2) 0.1227(2) 0.0346(15) Uani 1 1 d D . .
H132_1 H 0.1775 0.8802 0.1551 0.042 Uiso 1 1 calc R . .
C133_1 C 0.1872(2) 0.7984(2) 0.1238(2) 0.0262(14) Uani 1 1 d D . .
C134_1 C 0.1947(3) 0.7704(3) 0.0761(2) 0.0481(18) Uani 1 1 d D . .
H134_1 H 0.2004 0.7280 0.0746 0.058 Uiso 1 1 calc R . .
C135_1 C 0.1937(3) 0.8040(3) 0.0318(2) 0.055(2) Uani 1 1 d D . .
H135_1 H 0.1966 0.7851 -0.0013 0.066 Uiso 1 1 calc R . .
C136_1 C 0.1886(3) 0.8643(3) 0.0349(2) 0.0413(17) Uani 1 1 d D . .
H136_1 H 0.1889 0.8870 0.0034 0.050 Uiso 1 1 calc R . .
N141_1 N 0.5483(3) 0.6893(2) 0.1766(2) 0.0613(17) Uani 1 1 d D . .
C142_1 C 0.5100(2) 0.6850(2) 0.2161(2) 0.0281(14) Uani 1 1 d D . .
H142_1 H 0.5236 0.6883 0.2520 0.034 Uiso 1 1 calc R . .
C143_1 C 0.4532(2) 0.6762(2) 0.2026(2) 0.0215(13) Uani 1 1 d D . .
C144_1 C 0.4354(3) 0.6726(2) 0.1494(2) 0.0323(15) Uani 1 1 d D . .
H144_1 H 0.3956 0.6666 0.1400 0.039 Uiso 1 1 calc R . .
C145_1 C 0.4698(2) 0.6768(2) 0.11157(19) 0.0180(12) Uani 1 1 d D . .
H145_1 H 0.4559 0.6743 0.0757 0.022 Uiso 1 1 calc R . .
C146_1 C 0.5239(3) 0.6847(2) 0.1251(2) 0.0397(17) Uani 1 1 d D . .
H146_1 H 0.5491 0.6875 0.0977 0.048 Uiso 1 1 calc R . .
C11_2 C 0.6852(2) 0.2621(2) 0.1696(2) 0.0229(13) Uani 1 1 d . . .
C12_2 C 0.6426(2) 0.3012(2) 0.1841(2) 0.0233(13) Uani 1 1 d . . .
O12_2 O 0.59590(16) 0.30983(15) 0.14746(14) 0.0296(10) Uani 1 1 d . . .
C13_2 C 0.6436(2) 0.3274(2) 0.2334(2) 0.0211(13) Uani 1 1 d . . .
C14_2 C 0.6900(2) 0.3144(2) 0.2685(2) 0.0242(14) Uani 1 1 d . . .
H14_2 H 0.6911 0.3318 0.3026 0.029 Uiso 1 1 calc R . .
C15_2 C 0.7350(2) 0.2774(2) 0.2564(2) 0.0212(13) Uani 1 1 d . . .
C16_2 C 0.7321(2) 0.2529(2) 0.2062(2) 0.0235(13) Uani 1 1 d . . .
O16_2 O 0.77682(15) 0.21660(14) 0.19151(13) 0.0248(9) Uani 1 1 d . . .
C21_2 C 0.9124(2) 0.3482(2) 0.2385(2) 0.0224(13) Uani 1 1 d . . .
C22_2 C 0.8699(2) 0.3065(2) 0.2471(2) 0.0232(13) Uani 1 1 d . . .
O22_2 O 0.86947(15) 0.25353(14) 0.21698(13) 0.0244(9) Uani 1 1 d . . .
C23_2 C 0.8311(2) 0.3140(2) 0.2848(2) 0.0228(13) Uani 1 1 d . . .
C24_2 C 0.8348(2) 0.3673(2) 0.3132(2) 0.0224(13) Uani 1 1 d . . .
H24_2 H 0.8075 0.3744 0.3383 0.027 Uiso 1 1 calc R . .
C25_2 C 0.8762(2) 0.4106(2) 0.3069(2) 0.0237(13) Uani 1 1 d . . .
C26_2 C 0.9153(2) 0.4002(2) 0.2704(2) 0.0202(13) Uani 1 1 d . . .
O26_2 O 0.96072(15) 0.43946(14) 0.26515(14) 0.0270(9) Uani 1 1 d . . .
C31_2 C 0.8423(2) 0.5843(2) 0.2292(2) 0.0259(14) Uani 1 1 d . . .
C32_2 C 0.8709(3) 0.5458(2) 0.2643(2) 0.0282(14) Uani 1 1 d . . .
O32_2 O 0.92949(16) 0.53977(15) 0.26204(14) 0.0288(10) Uani 1 1 d . . .
C33_2 C 0.8439(3) 0.5153(2) 0.3027(2) 0.0241(14) Uani 1 1 d . . .
C34_2 C 0.7858(2) 0.5261(2) 0.3059(2) 0.0247(14) Uani 1 1 d . . .
H34_2 H 0.7668 0.5063 0.3327 0.030 Uiso 1 1 calc R . .
C35_2 C 0.7542(3) 0.5644(2) 0.2720(2) 0.0277(14) Uani 1 1 d . . .
C36_2 C 0.7836(3) 0.5911(2) 0.2330(2) 0.0307(15) Uani 1 1 d . . .
O36_2 O 0.75411(16) 0.62914(14) 0.19622(15) 0.0312(10) Uani 1 1 d . . .
C41_2 C 0.6112(2) 0.5035(2) 0.1565(2) 0.0283(14) Uani 1 1 d . . .
C42_2 C 0.6434(2) 0.5426(2) 0.1894(2) 0.0264(14) Uani 1 1 d . . .
O42_2 O 0.66073(16) 0.59668(15) 0.16802(14) 0.0307(10) Uani 1 1 d . . .
C43_2 C 0.6573(2) 0.5302(2) 0.2420(2) 0.0255(14) Uani 1 1 d . . .
C44_2 C 0.6403(2) 0.4742(2) 0.2606(2) 0.0248(13) Uani 1 1 d . . .
H44_2 H 0.6502 0.4642 0.2963 0.030 Uiso 1 1 calc R . .
C45_2 C 0.6098(2) 0.4328(2) 0.2293(2) 0.0271(14) Uani 1 1 d . . .
C46_2 C 0.5945(2) 0.4487(2) 0.1777(2) 0.0280(14) Uani 1 1 d . . .
O46_2 O 0.56232(16) 0.40990(15) 0.14499(14) 0.0301(10) Uani 1 1 d . . .
C51_2 C 0.5964(2) 0.3694(2) 0.2478(2) 0.0232(13) Uani 1 1 d . . .
H51_2 H 0.5604 0.3561 0.2273 0.028 Uiso 1 1 calc R . .
C52_2 C 0.5852(2) 0.3656(2) 0.3063(2) 0.0265(14) Uani 1 1 d . . .
H52A_2 H 0.5800 0.3226 0.3156 0.032 Uiso 1 1 calc R . .
H52B_2 H 0.6198 0.3804 0.3273 0.032 Uiso 1 1 calc R . .
C53_2 C 0.5337(3) 0.4008(3) 0.3220(2) 0.0386(16) Uani 1 1 d . . .
H53A_2 H 0.5399 0.4443 0.3156 0.046 Uiso 1 1 calc R . .
H53B_2 H 0.4993 0.3880 0.2998 0.046 Uiso 1 1 calc R . .
C54_2 C 0.5229(3) 0.3917(3) 0.3790(2) 0.0415(17) Uani 1 1 d . . .
H54A_2 H 0.5146 0.3485 0.3844 0.050 Uiso 1 1 calc R . .
H54B_2 H 0.5587 0.4015 0.4006 0.050 Uiso 1 1 calc R . .
C55_2 C 0.4757(3) 0.4277(3) 0.3984(2) 0.0479(18) Uani 1 1 d . . .
H55A_2 H 0.4396 0.4166 0.3778 0.057 Uiso 1 1 calc R . .
H55B_2 H 0.4832 0.4708 0.3914 0.057 Uiso 1 1 calc R . .
C56_2 C 0.4668(3) 0.4206(3) 0.4552(2) 0.060(2) Uani 1 1 d . . .
H56B_2 H 0.4362 0.4478 0.4646 0.089 Uiso 1 1 calc R . .
H56E_2 H 0.5025 0.4306 0.4761 0.089 Uiso 1 1 calc R . .
H56F_2 H 0.4561 0.3788 0.4622 0.089 Uiso 1 1 calc R . .
C57_2 C 0.5937(3) 0.3656(2) 0.1198(2) 0.0310(15) Uani 1 1 d . . .
H57A_2 H 0.6333 0.3803 0.1167 0.037 Uiso 1 1 calc R . .
H57B_2 H 0.5758 0.3589 0.0839 0.037 Uiso 1 1 calc R . .
C61_2 C 0.7867(2) 0.2666(2) 0.2941(2) 0.0224(13) Uani 1 1 d . . .
H61_2 H 0.8033 0.2267 0.2848 0.027 Uiso 1 1 calc R . .
C62_2 C 0.7722(2) 0.2629(2) 0.3515(2) 0.0258(14) Uani 1 1 d . . .
H62A_2 H 0.7424 0.2316 0.3548 0.031 Uiso 1 1 calc R . .
H62B_2 H 0.7562 0.3020 0.3620 0.031 Uiso 1 1 calc R . .
C63_2 C 0.8246(2) 0.2476(2) 0.3889(2) 0.0283(14) Uani 1 1 d . . .
H63A_2 H 0.8399 0.2078 0.3790 0.034 Uiso 1 1 calc R . .
H63B_2 H 0.8550 0.2780 0.3846 0.034 Uiso 1 1 calc R . .
C64_2 C 0.8114(2) 0.2458(3) 0.4460(2) 0.0360(15) Uani 1 1 d . . .
H64A_2 H 0.7867 0.2105 0.4517 0.043 Uiso 1 1 calc R . .
H64B_2 H 0.7897 0.2826 0.4541 0.043 Uiso 1 1 calc R . .
C65_2 C 0.8655(3) 0.2418(3) 0.4839(2) 0.0511(19) Uani 1 1 d . . .
H65A_2 H 0.8837 0.2019 0.4801 0.061 Uiso 1 1 calc R . .
H65B_2 H 0.8933 0.2730 0.4743 0.061 Uiso 1 1 calc R . .
C66_2 C 0.8520(3) 0.2508(4) 0.5410(3) 0.077(3) Uani 1 1 d . . .
H66B_2 H 0.8879 0.2531 0.5634 0.116 Uiso 1 1 calc R . .
H66E_2 H 0.8291 0.2168 0.5522 0.116 Uiso 1 1 calc R . .
H66F_2 H 0.8304 0.2884 0.5442 0.116 Uiso 1 1 calc R . .
C67_2 C 0.8255(2) 0.2474(2) 0.1762(2) 0.0235(13) Uani 1 1 d . . .
H67A_2 H 0.8137 0.2881 0.1635 0.028 Uiso 1 1 calc R . .
H67B_2 H 0.8409 0.2256 0.1466 0.028 Uiso 1 1 calc R . .
C71_2 C 0.8758(3) 0.4697(2) 0.3378(2) 0.0280(14) Uani 1 1 d . . .
H71_2 H 0.9166 0.4837 0.3430 0.034 Uiso 1 1 calc R . .
C72_2 C 0.8533(2) 0.4653(2) 0.3918(2) 0.0315(15) Uani 1 1 d . . .
H72A_2 H 0.8144 0.4474 0.3882 0.038 Uiso 1 1 calc R . .
H72B_2 H 0.8497 0.5066 0.4060 0.038 Uiso 1 1 calc R . .
C73_2 C 0.8907(3) 0.4281(3) 0.4309(2) 0.0402(16) Uani 1 1 d . . .
H73A_2 H 0.9258 0.4514 0.4419 0.048 Uiso 1 1 calc R . .
H73B_2 H 0.9028 0.3908 0.4134 0.048 Uiso 1 1 calc R . .
C74_2 C 0.8600(3) 0.4112(3) 0.4793(2) 0.0467(18) Uani 1 1 d . . .
H74A_2 H 0.8270 0.3851 0.4680 0.056 Uiso 1 1 calc R . .
H74B_2 H 0.8866 0.3870 0.5028 0.056 Uiso 1 1 calc R . .
C75_2 C 0.8386(3) 0.4627(3) 0.5101(3) 0.065(2) Uani 1 1 d . . .
H75A_2 H 0.8113 0.4868 0.4871 0.078 Uiso 1 1 calc R . .
H75B_2 H 0.8713 0.4891 0.5216 0.078 Uiso 1 1 calc R . .
C76_2 C 0.8090(3) 0.4420(4) 0.5578(3) 0.078(3) Uani 1 1 d . . .
H76B_2 H 0.7889 0.4762 0.5725 0.117 Uiso 1 1 calc R . .
H76E_2 H 0.8376 0.4262 0.5843 0.117 Uiso 1 1 calc R . .
H76F_2 H 0.7812 0.4102 0.5475 0.117 Uiso 1 1 calc R . .
C77_2 C 0.9493(2) 0.4910(2) 0.2331(2) 0.0309(15) Uani 1 1 d . . .
H77A_2 H 0.9848 0.5030 0.2169 0.037 Uiso 1 1 calc R . .
H77B_2 H 0.9200 0.4806 0.2044 0.037 Uiso 1 1 calc R . .
C81_2 C 0.6911(2) 0.5754(2) 0.2757(2) 0.0291(14) Uani 1 1 d . . .
H81_2 H 0.6825 0.6160 0.2600 0.035 Uiso 1 1 calc R . .
C82_2 C 0.6735(2) 0.5776(2) 0.3324(2) 0.0287(14) Uani 1 1 d . . .
H82A_2 H 0.6798 0.5374 0.3487 0.034 Uiso 1 1 calc R . .
H82B_2 H 0.6985 0.6068 0.3527 0.034 Uiso 1 1 calc R . .
C83_2 C 0.6118(2) 0.5956(2) 0.3360(2) 0.0291(14) Uani 1 1 d . . .
H83A_2 H 0.5868 0.5656 0.3169 0.035 Uiso 1 1 calc R . .
H83B_2 H 0.6052 0.6351 0.3184 0.035 Uiso 1 1 calc R . .
C84_2 C 0.5951(3) 0.6003(3) 0.3918(2) 0.0384(16) Uani 1 1 d . . .
H84A_2 H 0.6192 0.6317 0.4102 0.046 Uiso 1 1 calc R . .
H84B_2 H 0.6039 0.5614 0.4097 0.046 Uiso 1 1 calc R . .
C85_2 C 0.5327(3) 0.6154(3) 0.3971(2) 0.0397(16) Uani 1 1 d . . .
H85A_2 H 0.5085 0.5849 0.3777 0.048 Uiso 1 1 calc R . .
H85B_2 H 0.5249 0.6128 0.4346 0.048 Uiso 1 1 calc R . .
C86_2 C 0.5159(3) 0.6762(3) 0.3771(2) 0.0424(17) Uani 1 1 d . . .
H86B_2 H 0.4767 0.6852 0.3859 0.064 Uiso 1 1 calc R . .
H86E_2 H 0.5177 0.6773 0.3389 0.064 Uiso 1 1 calc R . .
H86F_2 H 0.5422 0.7065 0.3933 0.064 Uiso 1 1 calc R . .
C87_2 C 0.7191(3) 0.5994(2) 0.1569(2) 0.0334(15) Uani 1 1 d . . .
H87A_2 H 0.7336 0.5578 0.1528 0.040 Uiso 1 1 calc R . .
H87B_2 H 0.7220 0.6206 0.1231 0.040 Uiso 1 1 calc R . .
N111_2 N 0.6748(3) 0.2250(4) 0.0240(3) 0.117(3) Uani 1 1 d D . .
C112_2 C 0.6781(3) 0.2589(3) 0.0712(2) 0.057(2) Uani 1 1 d D . .
H112_2 H 0.6770 0.3017 0.0698 0.068 Uiso 1 1 calc R . .
C113_2 C 0.6830(2) 0.2305(2) 0.1185(2) 0.0323(15) Uani 1 1 d D . .
C114_2 C 0.6829(3) 0.1680(3) 0.1179(3) 0.0484(19) Uani 1 1 d D . .
H114_2 H 0.6843 0.1481 0.1509 0.058 Uiso 1 1 calc R . .
C115_2 C 0.6810(3) 0.1340(3) 0.0762(3) 0.056(2) Uani 1 1 d D . .
H115_2 H 0.6824 0.0912 0.0782 0.068 Uiso 1 1 calc R . .
C116_2 C 0.6771(4) 0.1623(4) 0.0318(4) 0.103(4) Uani 1 1 d D . .
H116_2 H 0.6755 0.1379 0.0011 0.123 Uiso 1 1 calc R . .
N121_2 N 0.9745(2) 0.3349(2) 0.10769(18) 0.0360(13) Uani 1 1 d D . .
C122_2 C 0.9391(2) 0.3421(2) 0.1460(2) 0.0263(14) Uani 1 1 d D . .
H122_2 H 0.8998 0.3499 0.1357 0.032 Uiso 1 1 calc R . .
C123_2 C 0.9544(2) 0.3393(2) 0.1992(2) 0.0234(14) Uani 1 1 d D . .
C124_2 C 1.0129(2) 0.3292(2) 0.2126(2) 0.0274(14) Uani 1 1 d D . .
H124_2 H 1.0265 0.3268 0.2486 0.033 Uiso 1 1 calc R . .
C125_2 C 1.0498(2) 0.3229(2) 0.1749(2) 0.0294(14) Uani 1 1 d D . .
H125_2 H 1.0896 0.3170 0.1840 0.035 Uiso 1 1 calc R . .
C126_2 C 1.0296(3) 0.3251(2) 0.1239(2) 0.0333(15) Uani 1 1 d D . .
H126_2 H 1.0561 0.3192 0.0979 0.040 Uiso 1 1 calc R . .
N131_2 N 0.9443(3) 0.6902(3) 0.1642(4) 0.134(4) Uani 1 1 d D . .
C132_2 C 0.9091(3) 0.6645(3) 0.2028(3) 0.080(3) Uani 1 1 d D . .
H132_2 H 0.9102 0.6813 0.2372 0.096 Uiso 1 1 calc R . .
C133_2 C 0.8745(3) 0.6167(3) 0.1906(3) 0.0410(17) Uani 1 1 d D . .
C134_2 C 0.8741(4) 0.5953(3) 0.1399(3) 0.090(3) Uani 1 1 d D . .
H134_2 H 0.8497 0.5616 0.1322 0.108 Uiso 1 1 calc R . .
C135_2 C 0.9024(4) 0.6148(4) 0.1005(3) 0.094(3) Uani 1 1 d D . .
H135_2 H 0.8978 0.6003 0.0654 0.113 Uiso 1 1 calc R . .
C136_2 C 0.9367(5) 0.6558(5) 0.1170(4) 0.111(4) Uiso 1 1 d D . .
H136_2 H 0.9635 0.6662 0.0923 0.133 Uiso 1 1 calc R . .
N141_2 N 0.5238(3) 0.5596(3) 0.0350(3) 0.086(2) Uani 1 1 d D . .
C142_2 C 0.5385(3) 0.5379(2) 0.0863(2) 0.0431(18) Uani 1 1 d D . .
H142_2 H 0.5095 0.5345 0.1103 0.052 Uiso 1 1 calc R . .
C143_2 C 0.5936(2) 0.5217(2) 0.1019(2) 0.0298(14) Uani 1 1 d D . .
C144_2 C 0.6326(3) 0.5278(3) 0.0655(2) 0.055(2) Uani 1 1 d D . .
H144_2 H 0.6710 0.5155 0.0752 0.066 Uiso 1 1 calc R . .
C145_2 C 0.6213(3) 0.5497(3) 0.0176(2) 0.0436(18) Uani 1 1 d D . .
H145_2 H 0.6509 0.5549 -0.0056 0.052 Uiso 1 1 calc R . .
C146_2 C 0.5683(3) 0.5637(3) 0.0035(3) 0.053(2) Uani 1 1 d D . .
H146_2 H 0.5599 0.5779 -0.0314 0.063 Uiso 1 1 calc R . .

loop_
 _atom_site_aniso_label
 _atom_site_aniso_U_11
 _atom_site_aniso_U_22
 _atom_site_aniso_U_33
 _atom_site_aniso_U_23
 _atom_site_aniso_U_13
 _atom_site_aniso_U_12
C1S 0.079(6) 0.053(5) 0.056(5) -0.001(4) -0.001(4) 0.005(4)
O1S 0.111(5) 0.070(4) 0.041(3) -0.001(2) -0.014(3) 0.008(3)
C2S 0.070(7) 0.090(6) 0.062(5) -0.020(5) 0.016(5) -0.007(5)
O2S 0.064(4) 0.076(3) 0.052(3) -0.006(3) 0.017(3) 0.011(3)
C3S 0.053(5) 0.047(4) 0.040(4) 0.003(3) 0.004(4) 0.012(3)
O3S 0.096(5) 0.124(5) 0.073(4) 0.033(3) 0.023(3) 0.068(4)
C4S 0.085(8) 0.132(8) 0.063(6) 0.002(6) 0.004(5) -0.051(6)
O4S 0.168(7) 0.064(4) 0.069(4) -0.003(3) -0.030(4) 0.021(4)
C5S 0.064(6) 0.059(5) 0.068(6) -0.006(4) 0.011(4) -0.003(4)
O5S 0.213(8) 0.088(5) 0.103(5) 0.031(4) 0.071(5) 0.034(5)
C6S 0.076(8) 0.084(6) 0.080(7) 0.005(5) -0.015(6) -0.003(5)
O6S 0.097(6) 0.166(6) 0.082(5) 0.021(4) 0.023(4) 0.023(5)
C11_1 0.017(4) 0.024(3) 0.027(3) 0.003(2) 0.007(3) 0.002(2)
C12_1 0.016(4) 0.025(3) 0.036(4) 0.009(3) 0.004(3) 0.000(2)
O12_1 0.022(3) 0.025(2) 0.034(2) 0.0081(17) 0.0080(19) -0.0014(16)
C13_1 0.021(4) 0.023(3) 0.028(3) 0.004(2) 0.004(3) -0.003(2)
C14_1 0.025(4) 0.020(3) 0.028(3) 0.004(2) 0.006(3) 0.000(2)
C15_1 0.018(4) 0.020(3) 0.031(3) 0.005(2) 0.003(3) 0.002(2)
C16_1 0.028(4) 0.015(3) 0.035(4) 0.003(2) 0.000(3) 0.001(2)
O16_1 0.022(3) 0.026(2) 0.030(2) -0.0006(16) 0.0007(18) -0.0008(16)
C21_1 0.028(4) 0.035(3) 0.025(3) 0.001(3) -0.003(3) -0.003(3)
C22_1 0.027(4) 0.023(3) 0.036(4) -0.009(3) 0.001(3) -0.005(2)
O22_1 0.023(3) 0.029(2) 0.039(2) -0.0055(17) -0.001(2) -0.0005(17)
C23_1 0.016(4) 0.028(3) 0.030(3) 0.002(2) 0.001(3) -0.004(2)
C24_1 0.017(4) 0.030(3) 0.036(4) -0.005(3) 0.003(3) -0.007(2)
C25_1 0.008(4) 0.033(3) 0.036(4) -0.003(3) -0.001(3) -0.006(2)
C26_1 0.024(4) 0.029(3) 0.042(4) 0.004(3) 0.000(3) -0.002(3)
O26_1 0.027(3) 0.035(2) 0.043(3) 0.0052(19) -0.010(2) 0.0050(19)
C31_1 0.019(4) 0.024(3) 0.036(4) 0.001(2) 0.004(3) 0.004(2)
C32_1 0.020(4) 0.035(3) 0.029(4) -0.003(3) -0.003(3) 0.010(3)
O32_1 0.030(3) 0.029(2) 0.042(3) -0.0022(18) -0.008(2) 0.0052(17)
C33_1 0.019(4) 0.027(3) 0.033(4) -0.003(3) 0.003(3) 0.004(2)
C34_1 0.032(4) 0.029(3) 0.024(3) 0.003(2) 0.000(3) 0.003(3)
C35_1 0.019(4) 0.021(3) 0.029(3) -0.001(2) 0.002(3) 0.005(2)
C36_1 0.022(4) 0.022(3) 0.034(4) -0.002(2) 0.000(3) 0.005(2)
O36_1 0.018(3) 0.027(2) 0.037(2) 0.0037(17) 0.0038(18) -0.0002(17)
C41_1 0.021(4) 0.026(3) 0.029(3) -0.001(3) -0.002(3) -0.004(3)
C42_1 0.018(4) 0.020(3) 0.033(4) 0.005(2) -0.003(3) -0.005(2)
O42_1 0.023(3) 0.022(2) 0.033(2) 0.0079(16) 0.0017(19) 0.0015(16)
C43_1 0.009(4) 0.030(3) 0.024(3) 0.001(2) -0.001(3) -0.005(2)
C44_1 0.018(4) 0.027(3) 0.027(3) 0.000(2) 0.001(3) 0.000(2)
C45_1 0.017(4) 0.028(3) 0.019(3) 0.003(2) 0.002(3) -0.006(2)
C46_1 0.018(4) 0.023(3) 0.027(3) -0.003(2) -0.007(3) 0.002(2)
O46_1 0.014(2) 0.025(2) 0.034(2) -0.0021(16) 0.0016(17) -0.0007(16)
C51_1 0.020(4) 0.019(3) 0.034(4) 0.005(2) -0.001(3) 0.002(2)
C52_1 0.020(4) 0.031(3) 0.026(3) 0.005(2) 0.004(3) -0.003(2)
C53_1 0.041(5) 0.039(3) 0.027(4) 0.004(3) 0.006(3) -0.003(3)
C54_1 0.032(4) 0.049(4) 0.034(4) -0.004(3) 0.009(3) -0.001(3)
C55_1 0.046(5) 0.061(4) 0.036(4) 0.017(3) 0.008(3) 0.008(3)
C56_1 0.051(6) 0.095(6) 0.039(4) 0.012(4) 0.013(4) -0.004(4)
C57_1 0.022(4) 0.038(3) 0.029(3) 0.000(3) 0.008(3) 0.005(3)
C61_1 0.022(4) 0.024(3) 0.031(4) -0.002(2) 0.003(3) -0.001(2)
C62_1 0.020(4) 0.029(3) 0.035(4) 0.000(3) 0.004(3) -0.003(2)
C63_1 0.035(4) 0.031(3) 0.032(4) 0.002(3) 0.004(3) -0.003(3)
C64_1 0.022(5) 0.080(5) 0.044(4) -0.002(4) 0.012(3) -0.009(3)
C65_1 0.059(6) 0.061(5) 0.056(5) -0.003(4) 0.012(4) -0.006(4)
C66_1 0.062(6) 0.071(6) 0.091(6) 0.004(5) 0.018(5) 0.001(4)
C67_1 0.033(5) 0.035(3) 0.032(4) 0.001(3) 0.000(3) 0.000(3)
C71_1 0.018(4) 0.027(3) 0.040(4) -0.002(3) -0.006(3) -0.001(2)
C72_1 0.024(4) 0.024(3) 0.045(4) -0.002(3) 0.004(3) -0.002(2)
C73_1 0.033(5) 0.049(4) 0.059(5) -0.003(3) 0.013(4) -0.007(3)
C74_1 0.054(6) 0.054(4) 0.067(5) -0.005(4) 0.038(4) -0.018(4)
C75_1 0.085(7) 0.085(6) 0.066(6) -0.006(5) 0.011(5) -0.028(5)
C76_1 0.087(7) 0.081(6) 0.077(6) -0.001(5) 0.005(5) -0.018(5)
C77_1 0.034(5) 0.041(4) 0.038(4) 0.006(3) -0.006(3) -0.001(3)
C81_1 0.017(4) 0.027(3) 0.029(3) -0.001(2) 0.003(3) -0.003(2)
C82_1 0.026(4) 0.028(3) 0.032(4) -0.002(3) -0.001(3) -0.001(2)
C83_1 0.034(4) 0.036(3) 0.028(4) 0.002(3) -0.001(3) -0.005(3)
C84_1 0.036(5) 0.054(4) 0.034(4) -0.013(3) 0.002(3) -0.006(3)
C85_1 0.051(5) 0.078(5) 0.033(4) -0.011(3) -0.003(4) -0.011(4)
C86_1 0.062(6) 0.101(6) 0.045(5) -0.006(4) -0.007(4) -0.013(5)
C87_1 0.021(4) 0.032(3) 0.027(3) 0.005(2) 0.003(3) 0.004(3)
N111_1 0.044(5) 0.056(4) 0.176(8) -0.050(5) 0.027(5) -0.020(3)
C112_1 0.028(4) 0.027(3) 0.068(5) -0.009(3) 0.012(3) 0.005(3)
C113_1 0.021(4) 0.035(3) 0.031(4) -0.005(3) 0.014(3) -0.005(3)
C114_1 0.059(6) 0.060(5) 0.052(5) -0.009(4) 0.018(4) 0.007(4)
C115_1 0.073(7) 0.075(6) 0.035(5) -0.011(4) 0.028(4) 0.012(5)
C116_1 0.063(7) 0.108(8) 0.070(7) -0.054(6) 0.044(6) -0.024(5)
N121_1 0.060(5) 0.056(4) 0.040(4) -0.004(3) -0.001(3) 0.009(3)
C122_1 0.054(5) 0.049(4) 0.035(4) -0.002(3) -0.009(4) 0.001(3)
C123_1 0.030(4) 0.045(4) 0.029(4) 0.005(3) -0.003(3) 0.004(3)
C124_1 0.068(6) 0.040(4) 0.045(5) -0.004(3) -0.017(4) -0.005(3)
C125_1 0.083(7) 0.047(4) 0.050(5) 0.005(4) -0.019(5) -0.017(4)
C126_1 0.064(6) 0.061(5) 0.043(5) -0.019(4) -0.015(4) 0.017(4)
N131_1 0.063(4) 0.042(3) 0.037(3) 0.009(3) -0.005(3) 0.005(3)
C132_1 0.031(4) 0.034(3) 0.038(4) 0.006(3) 0.000(3) 0.005(3)
C133_1 0.015(4) 0.035(3) 0.028(3) -0.004(3) 0.002(3) 0.005(2)
C134_1 0.060(5) 0.031(4) 0.054(5) -0.002(3) 0.014(4) 0.003(3)
C135_1 0.078(6) 0.055(5) 0.033(4) -0.004(3) 0.013(4) -0.005(4)
C136_1 0.050(5) 0.043(4) 0.031(4) 0.004(3) 0.001(3) -0.011(3)
N141_1 0.067(5) 0.061(4) 0.058(4) -0.005(3) 0.018(4) 0.002(3)
C142_1 0.017(4) 0.037(3) 0.031(4) 0.000(3) 0.004(3) -0.004(3)
C143_1 0.018(4) 0.018(3) 0.028(3) -0.001(2) -0.002(3) 0.001(2)
C144_1 0.029(4) 0.030(3) 0.037(4) -0.005(3) -0.001(3) -0.006(3)
C145_1 0.010(4) 0.033(3) 0.010(3) -0.003(2) -0.002(3) -0.002(2)
C146_1 0.066(6) 0.045(4) 0.011(3) -0.005(3) 0.023(3) -0.001(3)
C11_2 0.017(4) 0.027(3) 0.024(3) -0.004(2) 0.000(3) 0.000(2)
C12_2 0.019(4) 0.025(3) 0.025(3) 0.000(2) -0.002(3) -0.002(2)
O12_2 0.022(3) 0.030(2) 0.036(2) -0.0030(17) -0.0058(19) -0.0004(17)
C13_2 0.018(4) 0.021(3) 0.024(3) 0.004(2) 0.000(3) -0.007(2)
C14_2 0.027(4) 0.019(3) 0.026(3) 0.005(2) 0.000(3) -0.004(2)
C15_2 0.018(4) 0.019(3) 0.027(3) 0.004(2) 0.005(3) -0.003(2)
C16_2 0.019(4) 0.022(3) 0.030(3) 0.000(2) 0.002(3) 0.003(2)
O16_2 0.016(3) 0.026(2) 0.032(2) -0.0032(16) 0.0026(18) 0.0033(17)
C21_2 0.014(4) 0.024(3) 0.028(3) 0.003(2) -0.004(3) 0.003(2)
C22_2 0.016(4) 0.020(3) 0.033(3) -0.006(2) -0.005(3) 0.005(2)
O22_2 0.023(3) 0.0221(19) 0.028(2) -0.0044(16) -0.0031(18) 0.0027(15)
C23_2 0.021(4) 0.022(3) 0.025(3) 0.000(2) 0.000(3) 0.000(2)
C24_2 0.016(4) 0.028(3) 0.023(3) -0.004(2) 0.000(3) 0.004(2)
C25_2 0.020(4) 0.022(3) 0.028(3) -0.004(2) -0.004(3) 0.001(2)
C26_2 0.005(4) 0.026(3) 0.030(3) -0.001(2) -0.002(3) 0.004(2)
O26_2 0.017(3) 0.025(2) 0.038(2) -0.0022(17) 0.0002(18) -0.0040(16)
C31_2 0.014(4) 0.022(3) 0.042(4) 0.002(3) 0.009(3) 0.000(2)
C32_2 0.012(4) 0.029(3) 0.044(4) -0.011(3) 0.005(3) 0.001(2)
O32_2 0.019(3) 0.022(2) 0.045(3) -0.0040(17) 0.0054(19) -0.0028(16)
C33_2 0.027(4) 0.025(3) 0.021(3) -0.009(2) 0.002(3) -0.001(3)
C34_2 0.021(4) 0.026(3) 0.027(3) -0.001(2) 0.003(3) -0.006(2)
C35_2 0.026(4) 0.025(3) 0.033(4) -0.006(3) 0.007(3) 0.000(3)
C36_2 0.034(5) 0.024(3) 0.035(4) -0.002(3) 0.005(3) 0.005(3)
O36_2 0.027(3) 0.023(2) 0.044(3) 0.0047(18) 0.003(2) 0.0053(17)
C41_2 0.022(4) 0.028(3) 0.035(4) 0.004(3) 0.003(3) 0.009(3)
C42_2 0.016(4) 0.025(3) 0.040(4) 0.007(3) 0.008(3) 0.007(2)
O42_2 0.025(3) 0.024(2) 0.044(3) 0.0108(17) 0.006(2) 0.0030(17)
C43_2 0.019(4) 0.027(3) 0.032(4) 0.004(2) 0.010(3) 0.011(2)
C44_2 0.015(4) 0.030(3) 0.030(3) 0.004(3) 0.009(3) 0.002(2)
C45_2 0.019(4) 0.029(3) 0.033(4) 0.002(3) -0.001(3) 0.005(2)
C46_2 0.021(4) 0.031(3) 0.031(4) -0.004(3) -0.006(3) 0.002(2)
O46_2 0.024(3) 0.033(2) 0.033(2) -0.0004(18) -0.0031(19) 0.0061(18)
C51_2 0.014(4) 0.028(3) 0.028(3) -0.001(2) 0.002(3) 0.002(2)
C52_2 0.020(4) 0.026(3) 0.034(4) 0.001(2) 0.007(3) -0.002(2)
C53_2 0.030(4) 0.039(4) 0.046(4) 0.003(3) 0.000(3) 0.009(3)
C54_2 0.044(5) 0.042(4) 0.039(4) 0.004(3) 0.006(3) 0.015(3)
C55_2 0.038(5) 0.064(4) 0.043(4) 0.001(3) 0.016(3) 0.015(3)
C56_2 0.058(6) 0.083(5) 0.042(5) 0.008(4) 0.022(4) 0.011(4)
C57_2 0.034(4) 0.031(3) 0.026(3) 0.002(3) -0.008(3) 0.005(3)
C61_2 0.021(4) 0.018(3) 0.029(3) -0.001(2) 0.001(3) 0.000(2)
C62_2 0.024(4) 0.022(3) 0.031(3) -0.001(2) 0.000(3) 0.004(2)
C63_2 0.035(4) 0.023(3) 0.027(3) 0.006(2) 0.002(3) 0.003(2)
C64_2 0.022(4) 0.048(4) 0.038(4) 0.007(3) 0.006(3) 0.008(3)
C65_2 0.044(5) 0.079(5) 0.029(4) 0.014(3) -0.003(3) 0.011(4)
C66_2 0.052(6) 0.139(7) 0.038(5) 0.007(5) -0.013(4) 0.011(5)
C67_2 0.017(4) 0.027(3) 0.026(3) -0.006(2) -0.003(3) -0.006(2)
C71_2 0.026(4) 0.027(3) 0.032(4) -0.005(3) 0.002(3) -0.001(2)
C72_2 0.030(4) 0.033(3) 0.032(4) -0.009(3) 0.000(3) -0.003(3)
C73_2 0.034(5) 0.052(4) 0.035(4) 0.000(3) 0.004(3) 0.000(3)
C74_2 0.042(5) 0.055(4) 0.042(4) 0.006(3) 0.003(4) -0.001(3)
C75_2 0.060(6) 0.088(6) 0.049(5) -0.027(4) 0.011(4) -0.023(4)
C76_2 0.057(6) 0.140(8) 0.039(5) -0.015(5) 0.014(4) -0.019(5)
C77_2 0.028(4) 0.023(3) 0.041(4) 0.007(3) 0.001(3) 0.000(3)
C81_2 0.022(4) 0.022(3) 0.043(4) 0.001(3) 0.001(3) -0.002(2)
C82_2 0.033(4) 0.021(3) 0.032(4) -0.003(2) 0.007(3) -0.001(3)
C83_2 0.024(4) 0.032(3) 0.030(4) 0.002(3) 0.000(3) 0.001(3)
C84_2 0.041(5) 0.039(4) 0.037(4) 0.000(3) 0.010(3) 0.015(3)
C85_2 0.031(5) 0.053(4) 0.037(4) 0.002(3) 0.012(3) 0.004(3)
C86_2 0.031(4) 0.051(4) 0.046(4) 0.000(3) 0.012(3) 0.006(3)
C87_2 0.030(5) 0.028(3) 0.043(4) 0.007(3) 0.011(3) 0.004(3)
N111_2 0.082(7) 0.219(10) 0.048(5) -0.028(6) -0.009(4) 0.060(7)
C112_2 0.065(6) 0.071(5) 0.035(4) -0.005(4) 0.011(4) 0.033(4)
C113_2 0.020(4) 0.041(4) 0.035(4) -0.011(3) -0.005(3) 0.003(3)
C114_2 0.039(5) 0.051(4) 0.054(5) -0.020(4) -0.003(4) -0.006(3)
C115_2 0.042(5) 0.060(5) 0.065(5) -0.037(4) -0.012(4) -0.003(4)
C116_2 0.043(6) 0.144(10) 0.119(10) -0.096(8) -0.015(6) 0.039(6)
N121_2 0.037(4) 0.042(3) 0.030(3) 0.004(2) 0.007(3) 0.001(2)
C122_2 0.008(4) 0.035(3) 0.035(4) 0.006(3) -0.003(3) 0.001(2)
C123_2 0.024(4) 0.020(3) 0.025(3) 0.002(2) 0.000(3) -0.004(2)
C124_2 0.013(4) 0.033(3) 0.037(4) 0.007(3) 0.001(3) -0.001(2)
C125_2 0.010(4) 0.042(3) 0.036(4) -0.001(3) 0.002(3) 0.005(3)
C126_2 0.020(4) 0.038(3) 0.043(4) 0.006(3) 0.009(3) 0.001(3)
N131_2 0.037(5) 0.107(6) 0.250(11) 0.121(7) -0.039(6) -0.018(4)
C132_2 0.061(6) 0.066(5) 0.109(7) 0.047(5) -0.028(5) -0.036(4)
C133_2 0.023(4) 0.040(4) 0.061(5) 0.020(3) 0.007(3) 0.011(3)
C134_2 0.151(9) 0.056(5) 0.072(6) 0.031(5) 0.062(6) 0.017(5)
C135_2 0.126(9) 0.095(7) 0.068(6) 0.019(5) 0.056(6) 0.041(6)
N141_2 0.125(7) 0.057(4) 0.075(5) -0.001(4) -0.008(5) 0.012(4)
C142_2 0.039(5) 0.041(4) 0.047(4) 0.006(3) -0.007(3) 0.011(3)
C143_2 0.022(4) 0.031(3) 0.037(4) 0.001(3) 0.006(3) 0.005(3)
C144_2 0.047(6) 0.073(5) 0.046(5) 0.006(4) 0.010(4) 0.013(4)
C145_2 0.034(5) 0.076(5) 0.023(4) 0.023(3) 0.015(3) 0.008(3)
C146_2 0.061(6) 0.071(5) 0.026(4) 0.009(3) 0.001(4) 0.009(4)

_geom_special_details
;
 All esds (except the esd in the dihedral angle between two l.s. planes)
 are estimated using the full covariance matrix.  The cell esds are taken
 into account individually in the estimation of esds in distances, angles
 and torsion angles; correlations between esds in cell parameters are only
 used when they are defined by crystal symmetry.  An approximate (isotropic)
 treatment of cell esds is used for estimating esds involving l.s. planes.
;

loop_
 _geom_bond_atom_site_label_1
 _geom_bond_atom_site_label_2
 _geom_bond_distance
 _geom_bond_site_symmetry_2
 _geom_bond_publ_flag
C1S O1S 1.397(7) . ?
C1S H1A 0.9800 . ?
C1S H1B 0.9800 . ?
C1S H1C 0.9800 . ?
O1S H1 0.8400 . ?
C2S O2S 1.401(8) . ?
C2S H2A 0.9800 . ?
C2S H2B 0.9800 . ?
C2S H2C 0.9800 . ?
O2S H2 0.8400 . ?
C3S O3S 1.395(7) . ?
C3S H3A 0.9800 . ?
C3S H3B 0.9800 . ?
C3S H3C 0.9800 . ?
O3S H3 0.8400 . ?
C4S O4S 1.397(8) . ?
C4S H4A 0.9800 . ?
C4S H4B 0.9800 . ?
C4S H4C 0.9800 . ?
O4S H4 0.8400 . ?
C5S O5S 1.379(8) . ?
C5S H5A 0.9800 . ?
C5S H5B 0.9800 . ?
C5S H5C 0.9800 . ?
O5S H5 0.8400 . ?
C6S O6S 1.408(8) . ?
C6S H6A 0.9800 . ?
C6S H6B 0.9800 . ?
C6S H6C 0.9800 . ?
O6S H6 0.8400 . ?
C7A O7A 1.430(13) . ?
C7A H7A 0.9800 . ?
C7A H7B 0.9800 . ?
C7A H7C 0.9800 . ?
O7A H7D 0.8400 . ?
C7B O7B 1.436(16) . ?
C7B H7E 0.9800 . ?
C7B H7F 0.9800 . ?
C7B H7G 0.9800 . ?
O7B H7H 0.8400 . ?
C11_1 C12_1 1.386(7) . ?
C11_1 C16_1 1.386(7) . ?
C11_1 C113_1 1.472(7) . ?
C12_1 C13_1 1.376(7) . ?
C12_1 O12_1 1.391(6) . ?
O12_1 C57_1 1.411(6) . ?
C13_1 C14_1 1.383(7) . ?
C13_1 C51_1 1.518(7) . ?
C14_1 C15_1 1.391(7) . ?
C14_1 H14_1 0.9500 . ?
C15_1 C16_1 1.388(7) . ?
C15_1 C61_1 1.521(7) . ?
C16_1 O16_1 1.379(6) . ?
O16_1 C67_1 1.414(6) . ?
C21_1 C22_1 1.385(7) . ?
C21_1 C26_1 1.397(7) . ?
C21_1 C123_1 1.477(7) . ?
C22_1 C23_1 1.383(7) . ?
C22_1 O22_1 1.391(6) . ?
O22_1 C67_1 1.393(6) . ?
C23_1 C24_1 1.389(7) . ?
C23_1 C61_1 1.502(7) . ?
C24_1 C25_1 1.376(7) . ?
C24_1 H24_1 0.9500 . ?
C25_1 C26_1 1.394(7) . ?
C25_1 C71_1 1.508(7) . ?
C26_1 O26_1 1.364(6) . ?
O26_1 C77_1 1.401(6) . ?
C31_1 C36_1 1.385(7) . ?
C31_1 C32_1 1.399(7) . ?
C31_1 C133_1 1.479(7) . ?
C32_1 C33_1 1.367(7) . ?
C32_1 O32_1 1.392(6) . ?
O32_1 C77_1 1.410(6) . ?
C33_1 C34_1 1.391(7) . ?
C33_1 C71_1 1.520(7) . ?
C34_1 C35_1 1.385(7) . ?
C34_1 H34_1 0.9500 . ?
C35_1 C36_1 1.389(7) . ?
C35_1 C81_1 1.500(7) . ?
C36_1 O36_1 1.393(6) . ?
O36_1 C87_1 1.410(6) . ?
C41_1 C42_1 1.393(7) . ?
C41_1 C46_1 1.408(7) . ?
C41_1 C143_1 1.490(7) . ?
C42_1 C43_1 1.382(7) . ?
C42_1 O42_1 1.386(6) . ?
O42_1 C87_1 1.415(6) . ?
C43_1 C44_1 1.381(7) . ?
C43_1 C81_1 1.518(7) . ?
C44_1 C45_1 1.372(7) . ?
C44_1 H44_1 0.9500 . ?
C45_1 C46_1 1.380(7) . ?
C45_1 C51_1 1.518(7) . ?
C46_1 O46_1 1.395(6) . ?
O46_1 C57_1 1.405(6) . ?
C51_1 C52_1 1.526(7) . ?
C51_1 H51_1 1.0000 . ?
C52_1 C53_1 1.514(7) . ?
C52_1 H52A_1 0.9900 . ?
C52_1 H52B_1 0.9900 . ?
C53_1 C54_1 1.514(7) . ?
C53_1 H53A_1 0.9900 . ?
C53_1 H53B_1 0.9900 . ?
C54_1 C55_1 1.505(8) . ?
C54_1 H54A_1 0.9900 . ?
C54_1 H54B_1 0.9900 . ?
C55_1 C56_1 1.521(8) . ?
C55_1 H55A_1 0.9900 . ?
C55_1 H55B_1 0.9900 . ?
C56_1 H56A_1 0.9800 . ?
C56_1 H56B_1 0.9800 . ?
C56_1 H56C_1 0.9800 . ?
C57_1 H57A_1 0.9900 . ?
C57_1 H57B_1 0.9900 . ?
C61_1 C62_1 1.515(7) . ?
C61_1 H61_1 1.0000 . ?
C62_1 C63_1 1.509(7) . ?
C62_1 H62A_1 0.9900 . ?
C62_1 H62B_1 0.9900 . ?
C63_1 C64_1 1.519(8) . ?
C63_1 H63A_1 0.9900 . ?
C63_1 H63B_1 0.9900 . ?
C64_1 C65_1 1.492(8) . ?
C64_1 H64A_1 0.9900 . ?
C64_1 H64B_1 0.9900 . ?
C65_1 C66_1 1.469(9) . ?
C65_1 H65A_1 0.9900 . ?
C65_1 H65B_1 0.9900 . ?
C66_1 H66A_1 0.9800 . ?
C66_1 H66B_1 0.9800 . ?
C66_1 H66C_1 0.9800 . ?
C67_1 H67A_1 0.9900 . ?
C67_1 H67B_1 0.9900 . ?
C71_1 C72_1 1.528(7) . ?
C71_1 H71_1 1.0000 . ?
C72_1 C73_1 1.498(8) . ?
C72_1 H72A_1 0.9900 . ?
C72_1 H72B_1 0.9900 . ?
C73_1 C74_1 1.537(8) . ?
C73_1 H73A_1 0.9900 . ?
C73_1 H73B_1 0.9900 . ?
C74_1 C75_1 1.436(9) . ?
C74_1 H74A_1 0.9900 . ?
C74_1 H74B_1 0.9900 . ?
C75_1 C76_1 1.512(9) . ?
C75_1 H75A_1 0.9900 . ?
C75_1 H75B_1 0.9900 . ?
C76_1 H76A_1 0.9800 . ?
C76_1 H76B_1 0.9800 . ?
C76_1 H76C_1 0.9800 . ?
C77_1 H77A_1 0.9900 . ?
C77_1 H77B_1 0.9900 . ?
C81_1 C82_1 1.529(7) . ?
C81_1 H81_1 1.0000 . ?
C82_1 C83_1 1.517(7) . ?
C82_1 H82A_1 0.9900 . ?
C82_1 H82B_1 0.9900 . ?
C83_1 C84_1 1.522(7) . ?
C83_1 H83A_1 0.9900 . ?
C83_1 H83B_1 0.9900 . ?
C84_1 C85_1 1.545(8) . ?
C84_1 H84A_1 0.9900 . ?
C84_1 H84B_1 0.9900 . ?
C85_1 C86_1 1.512(9) . ?
C85_1 H85A_1 0.9900 . ?
C85_1 H85B_1 0.9900 . ?
C86_1 H86A_1 0.9800 . ?
C86_1 H86B_1 0.9800 . ?
C86_1 H86C_1 0.9800 . ?
C87_1 H87A_1 0.9900 . ?
C87_1 H87B_1 0.9900 . ?
N111_1 C116_1 1.375(10) . ?
N111_1 C112_1 1.413(9) . ?
C112_1 C113_1 1.377(7) . ?
C112_1 H112_1 0.9500 . ?
C113_1 C114_1 1.367(8) . ?
C114_1 C115_1 1.323(9) . ?
C114_1 H114_1 0.9500 . ?
C115_1 C116_1 1.269(11) . ?
C115_1 H115_1 0.9500 . ?
C116_1 H116_1 0.9500 . ?
N121_1 C122_1 1.352(6) . ?
N121_1 C126_1 1.368(7) . ?
C122_1 C123_1 1.365(7) . ?
C122_1 H122_1 0.9500 . ?
C123_1 C124_1 1.391(7) . ?
C124_1 C125_1 1.366(7) . ?
C124_1 H124_1 0.9500 . ?
C125_1 C126_1 1.350(8) . ?
C125_1 H125_1 0.9500 . ?
C126_1 H126_1 0.9500 . ?
N131_1 C132_1 1.331(6) . ?
N131_1 C136_1 1.335(6) . ?
C132_1 C133_1 1.373(6) . ?
C132_1 H132_1 0.9500 . ?
C133_1 C134_1 1.388(7) . ?
C134_1 C135_1 1.354(7) . ?
C134_1 H134_1 0.9500 . ?
C135_1 C136_1 1.343(7) . ?
C135_1 H135_1 0.9500 . ?
C136_1 H136_1 0.9500 . ?
N141_1 C146_1 1.395(7) . ?
N141_1 C142_1 1.399(7) . ?
C142_1 C143_1 1.358(6) . ?
C142_1 H142_1 0.9500 . ?
C143_1 C144_1 1.393(6) . ?
C144_1 C145_1 1.306(6) . ?
C144_1 H144_1 0.9500 . ?
C145_1 C146_1 1.296(7) . ?
C145_1 H145_1 0.9500 . ?
C146_1 H146_1 0.9500 . ?
C11_2 C12_2 1.389(7) . ?
C11_2 C16_2 1.400(7) . ?
C11_2 C113_2 1.478(7) . ?
C12_2 C13_2 1.386(7) . ?
C12_2 O12_2 1.395(6) . ?
O12_2 C57_2 1.421(6) . ?
C13_2 C14_2 1.382(7) . ?
C13_2 C51_2 1.509(7) . ?
C14_2 C15_2 1.386(7) . ?
C14_2 H14_2 0.9500 . ?
C15_2 C16_2 1.388(7) . ?
C15_2 C61_2 1.505(7) . ?
C16_2 O16_2 1.391(6) . ?
O16_2 C67_2 1.406(6) . ?
C21_2 C22_2 1.385(7) . ?
C21_2 C26_2 1.408(7) . ?
C21_2 C123_2 1.469(7) . ?
C22_2 C23_2 1.380(7) . ?
C22_2 O22_2 1.403(6) . ?
O22_2 C67_2 1.412(5) . ?
C23_2 C24_2 1.386(7) . ?
C23_2 C61_2 1.506(7) . ?
C24_2 C25_2 1.380(7) . ?
C24_2 H24_2 0.9500 . ?
C25_2 C26_2 1.371(7) . ?
C25_2 C71_2 1.529(7) . ?
C26_2 O26_2 1.386(6) . ?
O26_2 C77_2 1.418(6) . ?
C31_2 C32_2 1.373(7) . ?
C31_2 C36_2 1.389(8) . ?
C31_2 C133_2 1.471(8) . ?
C32_2 O32_2 1.380(6) . ?
C32_2 C33_2 1.382(8) . ?
O32_2 C77_2 1.407(6) . ?
C33_2 C34_2 1.385(7) . ?
C33_2 C71_2 1.510(7) . ?
C34_2 C35_2 1.386(7) . ?
C34_2 H34_2 0.9500 . ?
C35_2 C36_2 1.384(8) . ?
C35_2 C81_2 1.503(8) . ?
C36_2 O36_2 1.403(6) . ?
O36_2 C87_2 1.409(6) . ?
C41_2 C42_2 1.389(7) . ?
C41_2 C46_2 1.396(7) . ?
C41_2 C143_2 1.479(7) . ?
C42_2 C43_2 1.384(7) . ?
C42_2 O42_2 1.389(6) . ?
O42_2 C87_2 1.415(6) . ?
C43_2 C44_2 1.395(7) . ?
C43_2 C81_2 1.505(7) . ?
C44_2 C45_2 1.378(7) . ?
C44_2 H44_2 0.9500 . ?
C45_2 C46_2 1.384(7) . ?
C45_2 C51_2 1.521(7) . ?
C46_2 O46_2 1.381(6) . ?
O46_2 C57_2 1.409(6) . ?
C51_2 C52_2 1.539(7) . ?
C51_2 H51_2 1.0000 . ?
C52_2 C53_2 1.514(7) . ?
C52_2 H52A_2 0.9900 . ?
C52_2 H52B_2 0.9900 . ?
C53_2 C54_2 1.507(8) . ?
C53_2 H53A_2 0.9900 . ?
C53_2 H53B_2 0.9900 . ?
C54_2 C55_2 1.476(8) . ?
C54_2 H54A_2 0.9900 . ?
C54_2 H54B_2 0.9900 . ?
C55_2 C56_2 1.488(8) . ?
C55_2 H55A_2 0.9900 . ?
C55_2 H55B_2 0.9900 . ?
C56_2 H56B_2 0.9800 . ?
C56_2 H56E_2 0.9800 . ?
C56_2 H56F_2 0.9800 . ?
C57_2 H57A_2 0.9900 . ?
C57_2 H57B_2 0.9900 . ?
C61_2 C62_2 1.530(7) . ?
C61_2 H61_2 1.0000 . ?
C62_2 C63_2 1.532(7) . ?
C62_2 H62A_2 0.9900 . ?
C62_2 H62B_2 0.9900 . ?
C63_2 C64_2 1.512(7) . ?
C63_2 H63A_2 0.9900 . ?
C63_2 H63B_2 0.9900 . ?
C64_2 C65_2 1.534(8) . ?
C64_2 H64A_2 0.9900 . ?
C64_2 H64B_2 0.9900 . ?
C65_2 C66_2 1.529(9) . ?
C65_2 H65A_2 0.9900 . ?
C65_2 H65B_2 0.9900 . ?
C66_2 H66B_2 0.9800 . ?
C66_2 H66E_2 0.9800 . ?
C66_2 H66F_2 0.9800 . ?
C67_2 H67A_2 0.9900 . ?
C67_2 H67B_2 0.9900 . ?
C71_2 C72_2 1.513(7) . ?
C71_2 H71_2 1.0000 . ?
C72_2 C73_2 1.519(7) . ?
C72_2 H72A_2 0.9900 . ?
C72_2 H72B_2 0.9900 . ?
C73_2 C74_2 1.520(8) . ?
C73_2 H73A_2 0.9900 . ?
C73_2 H73B_2 0.9900 . ?
C74_2 C75_2 1.493(9) . ?
C74_2 H74A_2 0.9900 . ?
C74_2 H74B_2 0.9900 . ?
C75_2 C76_2 1.518(9) . ?
C75_2 H75A_2 0.9900 . ?
C75_2 H75B_2 0.9900 . ?
C76_2 H76B_2 0.9800 . ?
C76_2 H76E_2 0.9800 . ?
C76_2 H76F_2 0.9800 . ?
C77_2 H77A_2 0.9900 . ?
C77_2 H77B_2 0.9900 . ?
C81_2 C82_2 1.535(7) . ?
C81_2 H81_2 1.0000 . ?
C82_2 C83_2 1.505(7) . ?
C82_2 H82A_2 0.9900 . ?
C82_2 H82B_2 0.9900 . ?
C83_2 C84_2 1.507(7) . ?
C83_2 H83A_2 0.9900 . ?
C83_2 H83B_2 0.9900 . ?
C84_2 C85_2 1.511(8) . ?
C84_2 H84A_2 0.9900 . ?
C84_2 H84B_2 0.9900 . ?
C85_2 C86_2 1.483(7) . ?
C85_2 H85A_2 0.9900 . ?
C85_2 H85B_2 0.9900 . ?
C86_2 H86B_2 0.9800 . ?
C86_2 H86E_2 0.9800 . ?
C86_2 H86F_2 0.9800 . ?
C87_2 H87A_2 0.9900 . ?
C87_2 H87B_2 0.9900 . ?
N111_2 C116_2 1.405(9) . ?
N111_2 C112_2 1.416(8) . ?
C112_2 C113_2 1.357(7) . ?
C112_2 H112_2 0.9500 . ?
C113_2 C114_2 1.386(7) . ?
C114_2 C115_2 1.302(7) . ?
C114_2 H114_2 0.9500 . ?
C115_2 C116_2 1.290(9) . ?
C115_2 H115_2 0.9500 . ?
C116_2 H116_2 0.9500 . ?
N121_2 C122_2 1.338(6) . ?
N121_2 C126_2 1.339(6) . ?
C122_2 C123_2 1.377(6) . ?
C122_2 H122_2 0.9500 . ?
C123_2 C124_2 1.400(7) . ?
C124_2 C125_2 1.348(7) . ?
C124_2 H124_2 0.9500 . ?
C125_2 C126_2 1.351(7) . ?
C125_2 H125_2 0.9500 . ?
C126_2 H126_2 0.9500 . ?
N131_2 C136_2 1.423(10) . ?
N131_2 C132_2 1.448(9) . ?
C132_2 C133_2 1.354(7) . ?
C132_2 H132_2 0.9500 . ?
C133_2 C134_2 1.376(8) . ?
C134_2 C135_2 1.317(8) . ?
C134_2 H134_2 0.9500 . ?
C135_2 C136_2 1.262(10) . ?
C135_2 H135_2 0.9500 . ?
C136_2 H136_2 0.9500 . ?
N141_2 C146_2 1.364(8) . ?
N141_2 C142_2 1.410(7) . ?
C142_2 C143_2 1.368(7) . ?
C142_2 H142_2 0.9500 . ?
C143_2 C144_2 1.354(7) . ?
C144_2 C145_2 1.323(7) . ?
C144_2 H144_2 0.9500 . ?
C145_2 C146_2 1.302(7) . ?
C145_2 H145_2 0.9500 . ?
C146_2 H146_2 0.9500 . ?

loop_
 _geom_angle_atom_site_label_1
 _geom_angle_atom_site_label_2
 _geom_angle_atom_site_label_3
 _geom_angle
 _geom_angle_site_symmetry_1
 _geom_angle_site_symmetry_3
 _geom_angle_publ_flag
O1S C1S H1A 109.5 . . ?
O1S C1S H1B 109.5 . . ?
H1A C1S H1B 109.5 . . ?
O1S C1S H1C 109.5 . . ?
H1A C1S H1C 109.5 . . ?
H1B C1S H1C 109.5 . . ?
C1S O1S H1 109.5 . . ?
O2S C2S H2A 109.5 . . ?
O2S C2S H2B 109.5 . . ?
H2A C2S H2B 109.5 . . ?
O2S C2S H2C 109.5 . . ?
H2A C2S H2C 109.5 . . ?
H2B C2S H2C 109.5 . . ?
C2S O2S H2 109.5 . . ?
O3S C3S H3A 109.5 . . ?
O3S C3S H3B 109.5 . . ?
H3A C3S H3B 109.5 . . ?
O3S C3S H3C 109.5 . . ?
H3A C3S H3C 109.5 . . ?
H3B C3S H3C 109.5 . . ?
C3S O3S H3 109.5 . . ?
O4S C4S H4A 109.5 . . ?
O4S C4S H4B 109.5 . . ?
H4A C4S H4B 109.5 . . ?
O4S C4S H4C 109.5 . . ?
H4A C4S H4C 109.5 . . ?
H4B C4S H4C 109.5 . . ?
C4S O4S H4 109.5 . . ?
O5S C5S H5A 109.5 . . ?
O5S C5S H5B 109.5 . . ?
H5A C5S H5B 109.5 . . ?
O5S C5S H5C 109.5 . . ?
H5A C5S H5C 109.5 . . ?
H5B C5S H5C 109.5 . . ?
C5S O5S H5 109.5 . . ?
O6S C6S H6A 109.5 . . ?
O6S C6S H6B 109.5 . . ?
H6A C6S H6B 109.5 . . ?
O6S C6S H6C 109.5 . . ?
H6A C6S H6C 109.5 . . ?
H6B C6S H6C 109.5 . . ?
C6S O6S H6 109.5 . . ?
O7A C7A H7A 109.5 . . ?
O7A C7A H7B 109.5 . . ?
H7A C7A H7B 109.5 . . ?
O7A C7A H7C 109.5 . . ?
H7A C7A H7C 109.5 . . ?
H7B C7A H7C 109.5 . . ?
C7A O7A H7D 109.5 . . ?
O7B C7B H7E 109.5 . . ?
O7B C7B H7F 109.5 . . ?
H7E C7B H7F 109.5 . . ?
O7B C7B H7G 109.5 . . ?
H7E C7B H7G 109.5 . . ?
H7F C7B H7G 109.5 . . ?
C7B O7B H7H 109.5 . . ?
C12_1 C11_1 C16_1 117.5(5) . . ?
C12_1 C11_1 C113_1 119.7(5) . . ?
C16_1 C11_1 C113_1 122.7(5) . . ?
C13_1 C12_1 C11_1 123.2(6) . . ?
C13_1 C12_1 O12_1 119.6(5) . . ?
C11_1 C12_1 O12_1 117.1(5) . . ?
C12_1 O12_1 C57_1 116.1(4) . . ?
C12_1 C13_1 C14_1 117.3(5) . . ?
C12_1 C13_1 C51_1 120.5(5) . . ?
C14_1 C13_1 C51_1 122.1(5) . . ?
C13_1 C14_1 C15_1 122.0(5) . . ?
C13_1 C14_1 H14_1 119.0 . . ?
C15_1 C14_1 H14_1 119.0 . . ?
C16_1 C15_1 C14_1 118.2(5) . . ?
C16_1 C15_1 C61_1 120.2(5) . . ?
C14_1 C15_1 C61_1 121.5(5) . . ?
O16_1 C16_1 C11_1 118.5(5) . . ?
O16_1 C16_1 C15_1 120.1(5) . . ?
C11_1 C16_1 C15_1 121.4(5) . . ?
C16_1 O16_1 C67_1 116.3(4) . . ?
C22_1 C21_1 C26_1 119.1(5) . . ?
C22_1 C21_1 C123_1 119.2(5) . . ?
C26_1 C21_1 C123_1 121.7(5) . . ?
C23_1 C22_1 C21_1 121.5(5) . . ?
C23_1 C22_1 O22_1 120.0(5) . . ?
C21_1 C22_1 O22_1 118.5(5) . . ?
C22_1 O22_1 C67_1 117.1(4) . . ?
C22_1 C23_1 C24_1 117.2(5) . . ?
C22_1 C23_1 C61_1 119.7(5) . . ?
C24_1 C23_1 C61_1 122.9(5) . . ?
C25_1 C24_1 C23_1 124.0(5) . . ?
C25_1 C24_1 H24_1 118.0 . . ?
C23_1 C24_1 H24_1 118.0 . . ?
C24_1 C25_1 C26_1 116.9(5) . . ?
C24_1 C25_1 C71_1 123.2(5) . . ?
C26_1 C25_1 C71_1 119.8(5) . . ?
O26_1 C26_1 C25_1 121.0(5) . . ?
O26_1 C26_1 C21_1 117.7(5) . . ?
C25_1 C26_1 C21_1 121.3(5) . . ?
C26_1 O26_1 C77_1 117.9(4) . . ?
C36_1 C31_1 C32_1 116.5(5) . . ?
C36_1 C31_1 C133_1 121.0(5) . . ?
C32_1 C31_1 C133_1 122.4(5) . . ?
C33_1 C32_1 O32_1 119.7(5) . . ?
C33_1 C32_1 C31_1 123.2(5) . . ?
O32_1 C32_1 C31_1 117.1(5) . . ?
C32_1 O32_1 C77_1 115.0(4) . . ?
C32_1 C33_1 C34_1 117.4(5) . . ?
C32_1 C33_1 C71_1 121.5(5) . . ?
C34_1 C33_1 C71_1 121.1(5) . . ?
C35_1 C34_1 C33_1 122.8(5) . . ?
C35_1 C34_1 H34_1 118.6 . . ?
C33_1 C34_1 H34_1 118.6 . . ?
C34_1 C35_1 C36_1 116.9(5) . . ?
C34_1 C35_1 C81_1 122.9(5) . . ?
C36_1 C35_1 C81_1 120.1(5) . . ?
C31_1 C36_1 C35_1 123.1(5) . . ?
C31_1 C36_1 O36_1 117.6(5) . . ?
C35_1 C36_1 O36_1 119.2(5) . . ?
C36_1 O36_1 C87_1 113.5(4) . . ?
C42_1 C41_1 C46_1 116.9(5) . . ?
C42_1 C41_1 C143_1 123.4(5) . . ?
C46_1 C41_1 C143_1 119.8(5) . . ?
C43_1 C42_1 O42_1 120.9(5) . . ?
C43_1 C42_1 C41_1 122.4(5) . . ?
O42_1 C42_1 C41_1 116.6(5) . . ?
C42_1 O42_1 C87_1 117.4(4) . . ?
C44_1 C43_1 C42_1 117.2(5) . . ?
C44_1 C43_1 C81_1 122.0(5) . . ?
C42_1 C43_1 C81_1 120.8(5) . . ?
C45_1 C44_1 C43_1 123.9(5) . . ?
C45_1 C44_1 H44_1 118.1 . . ?
C43_1 C44_1 H44_1 118.1 . . ?
C44_1 C45_1 C46_1 117.1(5) . . ?
C44_1 C45_1 C51_1 122.6(5) . . ?
C46_1 C45_1 C51_1 120.1(5) . . ?
C45_1 C46_1 O46_1 120.9(4) . . ?
C45_1 C46_1 C41_1 122.4(5) . . ?
O46_1 C46_1 C41_1 116.6(5) . . ?
C46_1 O46_1 C57_1 117.5(4) . . ?
C45_1 C51_1 C13_1 106.8(4) . . ?
C45_1 C51_1 C52_1 115.0(4) . . ?
C13_1 C51_1 C52_1 112.8(4) . . ?
C45_1 C51_1 H51_1 107.3 . . ?
C13_1 C51_1 H51_1 107.3 . . ?
C52_1 C51_1 H51_1 107.3 . . ?
C53_1 C52_1 C51_1 113.0(4) . . ?
C53_1 C52_1 H52A_1 109.0 . . ?
C51_1 C52_1 H52A_1 109.0 . . ?
C53_1 C52_1 H52B_1 109.0 . . ?
C51_1 C52_1 H52B_1 109.0 . . ?
H52A_1 C52_1 H52B_1 107.8 . . ?
C54_1 C53_1 C52_1 112.6(5) . . ?
C54_1 C53_1 H53A_1 109.1 . . ?
C52_1 C53_1 H53A_1 109.1 . . ?
C54_1 C53_1 H53B_1 109.1 . . ?
C52_1 C53_1 H53B_1 109.1 . . ?
H53A_1 C53_1 H53B_1 107.8 . . ?
C55_1 C54_1 C53_1 116.1(5) . . ?
C55_1 C54_1 H54A_1 108.3 . . ?
C53_1 C54_1 H54A_1 108.3 . . ?
C55_1 C54_1 H54B_1 108.3 . . ?
C53_1 C54_1 H54B_1 108.3 . . ?
H54A_1 C54_1 H54B_1 107.4 . . ?
C54_1 C55_1 C56_1 112.0(5) . . ?
C54_1 C55_1 H55A_1 109.2 . . ?
C56_1 C55_1 H55A_1 109.2 . . ?
C54_1 C55_1 H55B_1 109.2 . . ?
C56_1 C55_1 H55B_1 109.2 . . ?
H55A_1 C55_1 H55B_1 107.9 . . ?
C55_1 C56_1 H56A_1 109.5 . . ?
C55_1 C56_1 H56B_1 109.5 . . ?
H56A_1 C56_1 H56B_1 109.5 . . ?
C55_1 C56_1 H56C_1 109.5 . . ?
H56A_1 C56_1 H56C_1 109.5 . . ?
H56B_1 C56_1 H56C_1 109.5 . . ?
O46_1 C57_1 O12_1 112.9(4) . . ?
O46_1 C57_1 H57A_1 109.0 . . ?
O12_1 C57_1 H57A_1 109.0 . . ?
O46_1 C57_1 H57B_1 109.0 . . ?
O12_1 C57_1 H57B_1 109.0 . . ?
H57A_1 C57_1 H57B_1 107.8 . . ?
C23_1 C61_1 C62_1 114.4(5) . . ?
C23_1 C61_1 C15_1 108.7(4) . . ?
C62_1 C61_1 C15_1 112.5(4) . . ?
C23_1 C61_1 H61_1 106.9 . . ?
C62_1 C61_1 H61_1 106.9 . . ?
C15_1 C61_1 H61_1 106.9 . . ?
C63_1 C62_1 C61_1 113.6(4) . . ?
C63_1 C62_1 H62A_1 108.9 . . ?
C61_1 C62_1 H62A_1 108.9 . . ?
C63_1 C62_1 H62B_1 108.9 . . ?
C61_1 C62_1 H62B_1 108.9 . . ?
H62A_1 C62_1 H62B_1 107.7 . . ?
C62_1 C63_1 C64_1 112.1(5) . . ?
C62_1 C63_1 H63A_1 109.2 . . ?
C64_1 C63_1 H63A_1 109.2 . . ?
C62_1 C63_1 H63B_1 109.2 . . ?
C64_1 C63_1 H63B_1 109.2 . . ?
H63A_1 C63_1 H63B_1 107.9 . . ?
C65_1 C64_1 C63_1 115.9(5) . . ?
C65_1 C64_1 H64A_1 108.3 . . ?
C63_1 C64_1 H64A_1 108.3 . . ?
C65_1 C64_1 H64B_1 108.3 . . ?
C63_1 C64_1 H64B_1 108.3 . . ?
H64A_1 C64_1 H64B_1 107.4 . . ?
C66_1 C65_1 C64_1 112.8(6) . . ?
C66_1 C65_1 H65A_1 109.0 . . ?
C64_1 C65_1 H65A_1 109.0 . . ?
C66_1 C65_1 H65B_1 109.0 . . ?
C64_1 C65_1 H65B_1 109.0 . . ?
H65A_1 C65_1 H65B_1 107.8 . . ?
C65_1 C66_1 H66A_1 109.5 . . ?
C65_1 C66_1 H66B_1 109.5 . . ?
H66A_1 C66_1 H66B_1 109.5 . . ?
C65_1 C66_1 H66C_1 109.5 . . ?
H66A_1 C66_1 H66C_1 109.5 . . ?
H66B_1 C66_1 H66C_1 109.5 . . ?
O22_1 C67_1 O16_1 114.5(5) . . ?
O22_1 C67_1 H67A_1 108.6 . . ?
O16_1 C67_1 H67A_1 108.6 . . ?
O22_1 C67_1 H67B_1 108.6 . . ?
O16_1 C67_1 H67B_1 108.6 . . ?
H67A_1 C67_1 H67B_1 107.6 . . ?
C25_1 C71_1 C33_1 109.1(5) . . ?
C25_1 C71_1 C72_1 113.2(4) . . ?
C33_1 C71_1 C72_1 112.3(4) . . ?
C25_1 C71_1 H71_1 107.3 . . ?
C33_1 C71_1 H71_1 107.3 . . ?
C72_1 C71_1 H71_1 107.3 . . ?
C73_1 C72_1 C71_1 116.1(5) . . ?
C73_1 C72_1 H72A_1 108.3 . . ?
C71_1 C72_1 H72A_1 108.3 . . ?
C73_1 C72_1 H72B_1 108.3 . . ?
C71_1 C72_1 H72B_1 108.3 . . ?
H72A_1 C72_1 H72B_1 107.4 . . ?
C72_1 C73_1 C74_1 111.5(5) . . ?
C72_1 C73_1 H73A_1 109.3 . . ?
C74_1 C73_1 H73A_1 109.3 . . ?
C72_1 C73_1 H73B_1 109.3 . . ?
C74_1 C73_1 H73B_1 109.3 . . ?
H73A_1 C73_1 H73B_1 108.0 . . ?
C75_1 C74_1 C73_1 115.7(6) . . ?
C75_1 C74_1 H74A_1 108.4 . . ?
C73_1 C74_1 H74A_1 108.4 . . ?
C75_1 C74_1 H74B_1 108.4 . . ?
C73_1 C74_1 H74B_1 108.4 . . ?
H74A_1 C74_1 H74B_1 107.4 . . ?
C74_1 C75_1 C76_1 114.8(7) . . ?
C74_1 C75_1 H75A_1 108.6 . . ?
C76_1 C75_1 H75A_1 108.6 . . ?
C74_1 C75_1 H75B_1 108.6 . . ?
C76_1 C75_1 H75B_1 108.6 . . ?
H75A_1 C75_1 H75B_1 107.6 . . ?
C75_1 C76_1 H76A_1 109.5 . . ?
C75_1 C76_1 H76B_1 109.5 . . ?
H76A_1 C76_1 H76B_1 109.5 . . ?
C75_1 C76_1 H76C_1 109.5 . . ?
H76A_1 C76_1 H76C_1 109.5 . . ?
H76B_1 C76_1 H76C_1 109.5 . . ?
O26_1 C77_1 O32_1 113.2(5) . . ?
O26_1 C77_1 H77A_1 108.9 . . ?
O32_1 C77_1 H77A_1 108.9 . . ?
O26_1 C77_1 H77B_1 108.9 . . ?
O32_1 C77_1 H77B_1 108.9 . . ?
H77A_1 C77_1 H77B_1 107.8 . . ?
C35_1 C81_1 C43_1 108.1(4) . . ?
C35_1 C81_1 C82_1 112.9(5) . . ?
C43_1 C81_1 C82_1 113.6(4) . . ?
C35_1 C81_1 H81_1 107.3 . . ?
C43_1 C81_1 H81_1 107.3 . . ?
C82_1 C81_1 H81_1 107.3 . . ?
C83_1 C82_1 C81_1 113.5(5) . . ?
C83_1 C82_1 H82A_1 108.9 . . ?
C81_1 C82_1 H82A_1 108.9 . . ?
C83_1 C82_1 H82B_1 108.9 . . ?
C81_1 C82_1 H82B_1 108.9 . . ?
H82A_1 C82_1 H82B_1 107.7 . . ?
C82_1 C83_1 C84_1 113.5(5) . . ?
C82_1 C83_1 H83A_1 108.9 . . ?
C84_1 C83_1 H83A_1 108.9 . . ?
C82_1 C83_1 H83B_1 108.9 . . ?
C84_1 C83_1 H83B_1 108.9 . . ?
H83A_1 C83_1 H83B_1 107.7 . . ?
C83_1 C84_1 C85_1 112.7(5) . . ?
C83_1 C84_1 H84A_1 109.1 . . ?
C85_1 C84_1 H84A_1 109.1 . . ?
C83_1 C84_1 H84B_1 109.1 . . ?
C85_1 C84_1 H84B_1 109.1 . . ?
H84A_1 C84_1 H84B_1 107.8 . . ?
C86_1 C85_1 C84_1 111.6(6) . . ?
C86_1 C85_1 H85A_1 109.3 . . ?
C84_1 C85_1 H85A_1 109.3 . . ?
C86_1 C85_1 H85B_1 109.3 . . ?
C84_1 C85_1 H85B_1 109.3 . . ?
H85A_1 C85_1 H85B_1 108.0 . . ?
C85_1 C86_1 H86A_1 109.5 . . ?
C85_1 C86_1 H86B_1 109.5 . . ?
H86A_1 C86_1 H86B_1 109.5 . . ?
C85_1 C86_1 H86C_1 109.5 . . ?
H86A_1 C86_1 H86C_1 109.5 . . ?
H86B_1 C86_1 H86C_1 109.5 . . ?
O36_1 C87_1 O42_1 112.2(4) . . ?
O36_1 C87_1 H87A_1 109.2 . . ?
O42_1 C87_1 H87A_1 109.2 . . ?
O36_1 C87_1 H87B_1 109.2 . . ?
O42_1 C87_1 H87B_1 109.2 . . ?
H87A_1 C87_1 H87B_1 107.9 . . ?
C116_1 N111_1 C112_1 116.4(7) . . ?
C113_1 C112_1 N111_1 118.8(7) . . ?
C113_1 C112_1 H112_1 120.6 . . ?
N111_1 C112_1 H112_1 120.6 . . ?
C114_1 C113_1 C112_1 117.8(6) . . ?
C114_1 C113_1 C11_1 124.2(6) . . ?
C112_1 C113_1 C11_1 118.0(5) . . ?
C115_1 C114_1 C113_1 123.2(7) . . ?
C115_1 C114_1 H114_1 118.4 . . ?
C113_1 C114_1 H114_1 118.4 . . ?
C116_1 C115_1 C114_1 119.0(8) . . ?
C116_1 C115_1 H115_1 120.5 . . ?
C114_1 C115_1 H115_1 120.5 . . ?
C115_1 C116_1 N111_1 124.7(8) . . ?
C115_1 C116_1 H116_1 117.6 . . ?
N111_1 C116_1 H116_1 117.6 . . ?
C122_1 N121_1 C126_1 114.8(6) . . ?
N121_1 C122_1 C123_1 125.8(6) . . ?
N121_1 C122_1 H122_1 117.1 . . ?
C123_1 C122_1 H122_1 117.1 . . ?
C122_1 C123_1 C124_1 116.4(5) . . ?
C122_1 C123_1 C21_1 122.4(5) . . ?
C124_1 C123_1 C21_1 121.1(6) . . ?
C125_1 C124_1 C123_1 120.0(6) . . ?
C125_1 C124_1 H124_1 120.0 . . ?
C123_1 C124_1 H124_1 120.0 . . ?
C126_1 C125_1 C124_1 119.4(6) . . ?
C126_1 C125_1 H125_1 120.3 . . ?
C124_1 C125_1 H125_1 120.3 . . ?
C125_1 C126_1 N121_1 123.5(6) . . ?
C125_1 C126_1 H126_1 118.2 . . ?
N121_1 C126_1 H126_1 118.2 . . ?
C132_1 N131_1 C136_1 115.9(5) . . ?
N131_1 C132_1 C133_1 124.8(5) . . ?
N131_1 C132_1 H132_1 117.6 . . ?
C133_1 C132_1 H132_1 117.6 . . ?
C132_1 C133_1 C134_1 116.5(5) . . ?
C132_1 C133_1 C31_1 120.1(5) . . ?
C134_1 C133_1 C31_1 123.3(5) . . ?
C135_1 C134_1 C133_1 119.3(5) . . ?
C135_1 C134_1 H134_1 120.3 . . ?
C133_1 C134_1 H134_1 120.3 . . ?
C136_1 C135_1 C134_1 119.6(6) . . ?
C136_1 C135_1 H135_1 120.2 . . ?
C134_1 C135_1 H135_1 120.2 . . ?
N131_1 C136_1 C135_1 123.8(6) . . ?
N131_1 C136_1 H136_1 118.1 . . ?
C135_1 C136_1 H136_1 118.1 . . ?
C146_1 N141_1 C142_1 115.9(5) . . ?
C143_1 C142_1 N141_1 119.4(5) . . ?
C143_1 C142_1 H142_1 120.3 . . ?
N141_1 C142_1 H142_1 120.3 . . ?
C142_1 C143_1 C144_1 118.1(5) . . ?
C142_1 C143_1 C41_1 121.6(5) . . ?
C144_1 C143_1 C41_1 120.3(5) . . ?
C145_1 C144_1 C143_1 124.0(6) . . ?
C145_1 C144_1 H144_1 118.0 . . ?
C143_1 C144_1 H144_1 118.0 . . ?
C146_1 C145_1 C144_1 117.1(5) . . ?
C146_1 C145_1 H145_1 121.4 . . ?
C144_1 C145_1 H145_1 121.4 . . ?
C145_1 C146_1 N141_1 125.5(5) . . ?
C145_1 C146_1 H146_1 117.2 . . ?
N141_1 C146_1 H146_1 117.2 . . ?
C12_2 C11_2 C16_2 117.0(5) . . ?
C12_2 C11_2 C113_2 123.4(5) . . ?
C16_2 C11_2 C113_2 119.6(5) . . ?
C13_2 C12_2 C11_2 122.6(5) . . ?
C13_2 C12_2 O12_2 120.7(5) . . ?
C11_2 C12_2 O12_2 116.6(4) . . ?
C12_2 O12_2 C57_2 116.7(4) . . ?
C14_2 C13_2 C12_2 117.4(5) . . ?
C14_2 C13_2 C51_2 121.6(5) . . ?
C12_2 C13_2 C51_2 121.0(4) . . ?
C13_2 C14_2 C15_2 123.3(5) . . ?
C13_2 C14_2 H14_2 118.3 . . ?
C15_2 C14_2 H14_2 118.3 . . ?
C14_2 C15_2 C16_2 116.9(5) . . ?
C14_2 C15_2 C61_2 122.4(5) . . ?
C16_2 C15_2 C61_2 120.6(5) . . ?
C15_2 C16_2 O16_2 119.3(5) . . ?
C15_2 C16_2 C11_2 122.7(5) . . ?
O16_2 C16_2 C11_2 118.0(5) . . ?
C16_2 O16_2 C67_2 115.6(4) . . ?
C22_2 C21_2 C26_2 117.2(5) . . ?
C22_2 C21_2 C123_2 122.8(5) . . ?
C26_2 C21_2 C123_2 120.0(5) . . ?
C23_2 C22_2 C21_2 123.1(5) . . ?
C23_2 C22_2 O22_2 120.2(5) . . ?
C21_2 C22_2 O22_2 116.6(5) . . ?
C22_2 O22_2 C67_2 117.3(4) . . ?
C22_2 C23_2 C24_2 116.6(5) . . ?
C22_2 C23_2 C61_2 121.5(4) . . ?
C24_2 C23_2 C61_2 121.9(5) . . ?
C25_2 C24_2 C23_2 123.2(5) . . ?
C25_2 C24_2 H24_2 118.4 . . ?
C23_2 C24_2 H24_2 118.4 . . ?
C26_2 C25_2 C24_2 118.1(5) . . ?
C26_2 C25_2 C71_2 121.7(5) . . ?
C24_2 C25_2 C71_2 120.2(5) . . ?
C25_2 C26_2 O26_2 120.9(5) . . ?
C25_2 C26_2 C21_2 121.6(5) . . ?
O26_2 C26_2 C21_2 117.5(5) . . ?
C26_2 O26_2 C77_2 116.7(4) . . ?
C32_2 C31_2 C36_2 117.2(5) . . ?
C32_2 C31_2 C133_2 119.4(5) . . ?
C36_2 C31_2 C133_2 123.4(5) . . ?
C31_2 C32_2 O32_2 118.0(6) . . ?
C31_2 C32_2 C33_2 122.7(6) . . ?
O32_2 C32_2 C33_2 119.3(5) . . ?
C32_2 O32_2 C77_2 117.6(4) . . ?
C32_2 C33_2 C34_2 117.3(5) . . ?
C32_2 C33_2 C71_2 121.1(5) . . ?
C34_2 C33_2 C71_2 121.5(5) . . ?
C33_2 C34_2 C35_2 123.2(6) . . ?
C33_2 C34_2 H34_2 118.4 . . ?
C35_2 C34_2 H34_2 118.4 . . ?
C36_2 C35_2 C34_2 116.1(6) . . ?
C36_2 C35_2 C81_2 121.3(5) . . ?
C34_2 C35_2 C81_2 122.6(5) . . ?
C35_2 C36_2 C31_2 123.4(5) . . ?
C35_2 C36_2 O36_2 119.4(5) . . ?
C31_2 C36_2 O36_2 117.2(5) . . ?
C36_2 O36_2 C87_2 115.2(4) . . ?
C42_2 C41_2 C46_2 117.5(5) . . ?
C42_2 C41_2 C143_2 120.0(5) . . ?
C46_2 C41_2 C143_2 122.4(5) . . ?
C43_2 C42_2 C41_2 122.6(5) . . ?
C43_2 C42_2 O42_2 119.9(5) . . ?
C41_2 C42_2 O42_2 117.4(5) . . ?
C42_2 O42_2 C87_2 115.3(4) . . ?
C42_2 C43_2 C44_2 117.0(5) . . ?
C42_2 C43_2 C81_2 119.8(5) . . ?
C44_2 C43_2 C81_2 123.2(5) . . ?
C45_2 C44_2 C43_2 122.9(5) . . ?
C45_2 C44_2 H44_2 118.6 . . ?
C43_2 C44_2 H44_2 118.6 . . ?
C44_2 C45_2 C46_2 117.8(5) . . ?
C44_2 C45_2 C51_2 123.1(5) . . ?
C46_2 C45_2 C51_2 119.0(5) . . ?
O46_2 C46_2 C45_2 120.5(5) . . ?
O46_2 C46_2 C41_2 117.5(5) . . ?
C45_2 C46_2 C41_2 122.0(5) . . ?
C46_2 O46_2 C57_2 115.5(4) . . ?
C13_2 C51_2 C45_2 108.8(4) . . ?
C13_2 C51_2 C52_2 112.4(4) . . ?
C45_2 C51_2 C52_2 113.9(4) . . ?
C13_2 C51_2 H51_2 107.1 . . ?
C45_2 C51_2 H51_2 107.1 . . ?
C52_2 C51_2 H51_2 107.1 . . ?
C53_2 C52_2 C51_2 115.1(4) . . ?
C53_2 C52_2 H52A_2 108.5 . . ?
C51_2 C52_2 H52A_2 108.5 . . ?
C53_2 C52_2 H52B_2 108.5 . . ?
C51_2 C52_2 H52B_2 108.5 . . ?
H52A_2 C52_2 H52B_2 107.5 . . ?
C54_2 C53_2 C52_2 112.3(5) . . ?
C54_2 C53_2 H53A_2 109.1 . . ?
C52_2 C53_2 H53A_2 109.1 . . ?
C54_2 C53_2 H53B_2 109.1 . . ?
C52_2 C53_2 H53B_2 109.1 . . ?
H53A_2 C53_2 H53B_2 107.9 . . ?
C55_2 C54_2 C53_2 115.7(5) . . ?
C55_2 C54_2 H54A_2 108.3 . . ?
C53_2 C54_2 H54A_2 108.3 . . ?
C55_2 C54_2 H54B_2 108.3 . . ?
C53_2 C54_2 H54B_2 108.3 . . ?
H54A_2 C54_2 H54B_2 107.4 . . ?
C54_2 C55_2 C56_2 115.6(5) . . ?
C54_2 C55_2 H55A_2 108.4 . . ?
C56_2 C55_2 H55A_2 108.4 . . ?
C54_2 C55_2 H55B_2 108.4 . . ?
C56_2 C55_2 H55B_2 108.4 . . ?
H55A_2 C55_2 H55B_2 107.4 . . ?
C55_2 C56_2 H56B_2 109.5 . . ?
C55_2 C56_2 H56E_2 109.5 . . ?
H56B_2 C56_2 H56E_2 109.5 . . ?
C55_2 C56_2 H56F_2 109.5 . . ?
H56B_2 C56_2 H56F_2 109.5 . . ?
H56E_2 C56_2 H56F_2 109.5 . . ?
O46_2 C57_2 O12_2 112.3(5) . . ?
O46_2 C57_2 H57A_2 109.1 . . ?
O12_2 C57_2 H57A_2 109.1 . . ?
O46_2 C57_2 H57B_2 109.1 . . ?
O12_2 C57_2 H57B_2 109.1 . . ?
H57A_2 C57_2 H57B_2 107.9 . . ?
C15_2 C61_2 C23_2 108.6(4) . . ?
C15_2 C61_2 C62_2 113.4(4) . . ?
C23_2 C61_2 C62_2 113.1(4) . . ?
C15_2 C61_2 H61_2 107.2 . . ?
C23_2 C61_2 H61_2 107.2 . . ?
C62_2 C61_2 H61_2 107.2 . . ?
C61_2 C62_2 C63_2 112.6(5) . . ?
C61_2 C62_2 H62A_2 109.1 . . ?
C63_2 C62_2 H62A_2 109.1 . . ?
C61_2 C62_2 H62B_2 109.1 . . ?
C63_2 C62_2 H62B_2 109.1 . . ?
H62A_2 C62_2 H62B_2 107.8 . . ?
C64_2 C63_2 C62_2 113.2(5) . . ?
C64_2 C63_2 H63A_2 108.9 . . ?
C62_2 C63_2 H63A_2 108.9 . . ?
C64_2 C63_2 H63B_2 108.9 . . ?
C62_2 C63_2 H63B_2 108.9 . . ?
H63A_2 C63_2 H63B_2 107.7 . . ?
C63_2 C64_2 C65_2 113.0(5) . . ?
C63_2 C64_2 H64A_2 109.0 . . ?
C65_2 C64_2 H64A_2 109.0 . . ?
C63_2 C64_2 H64B_2 109.0 . . ?
C65_2 C64_2 H64B_2 109.0 . . ?
H64A_2 C64_2 H64B_2 107.8 . . ?
C66_2 C65_2 C64_2 112.0(5) . . ?
C66_2 C65_2 H65A_2 109.2 . . ?
C64_2 C65_2 H65A_2 109.2 . . ?
C66_2 C65_2 H65B_2 109.2 . . ?
C64_2 C65_2 H65B_2 109.2 . . ?
H65A_2 C65_2 H65B_2 107.9 . . ?
C65_2 C66_2 H66B_2 109.5 . . ?
C65_2 C66_2 H66E_2 109.5 . . ?
H66B_2 C66_2 H66E_2 109.5 . . ?
C65_2 C66_2 H66F_2 109.5 . . ?
H66B_2 C66_2 H66F_2 109.5 . . ?
H66E_2 C66_2 H66F_2 109.5 . . ?
O16_2 C67_2 O22_2 113.7(4) . . ?
O16_2 C67_2 H67A_2 108.8 . . ?
O22_2 C67_2 H67A_2 108.8 . . ?
O16_2 C67_2 H67B_2 108.8 . . ?
O22_2 C67_2 H67B_2 108.8 . . ?
H67A_2 C67_2 H67B_2 107.7 . . ?
C33_2 C71_2 C72_2 113.1(5) . . ?
C33_2 C71_2 C25_2 106.7(4) . . ?
C72_2 C71_2 C25_2 115.6(4) . . ?
C33_2 C71_2 H71_2 107.0 . . ?
C72_2 C71_2 H71_2 107.0 . . ?
C25_2 C71_2 H71_2 107.0 . . ?
C71_2 C72_2 C73_2 114.2(5) . . ?
C71_2 C72_2 H72A_2 108.7 . . ?
C73_2 C72_2 H72A_2 108.7 . . ?
C71_2 C72_2 H72B_2 108.7 . . ?
C73_2 C72_2 H72B_2 108.7 . . ?
H72A_2 C72_2 H72B_2 107.6 . . ?
C72_2 C73_2 C74_2 112.6(5) . . ?
C72_2 C73_2 H73A_2 109.1 . . ?
C74_2 C73_2 H73A_2 109.1 . . ?
C72_2 C73_2 H73B_2 109.1 . . ?
C74_2 C73_2 H73B_2 109.1 . . ?
H73A_2 C73_2 H73B_2 107.8 . . ?
C75_2 C74_2 C73_2 115.9(5) . . ?
C75_2 C74_2 H74A_2 108.3 . . ?
C73_2 C74_2 H74A_2 108.3 . . ?
C75_2 C74_2 H74B_2 108.3 . . ?
C73_2 C74_2 H74B_2 108.3 . . ?
H74A_2 C74_2 H74B_2 107.4 . . ?
C74_2 C75_2 C76_2 112.5(6) . . ?
C74_2 C75_2 H75A_2 109.1 . . ?
C76_2 C75_2 H75A_2 109.1 . . ?
C74_2 C75_2 H75B_2 109.1 . . ?
C76_2 C75_2 H75B_2 109.1 . . ?
H75A_2 C75_2 H75B_2 107.8 . . ?
C75_2 C76_2 H76B_2 109.5 . . ?
C75_2 C76_2 H76E_2 109.5 . . ?
H76B_2 C76_2 H76E_2 109.5 . . ?
C75_2 C76_2 H76F_2 109.5 . . ?
H76B_2 C76_2 H76F_2 109.5 . . ?
H76E_2 C76_2 H76F_2 109.5 . . ?
O32_2 C77_2 O26_2 111.7(4) . . ?
O32_2 C77_2 H77A_2 109.3 . . ?
O26_2 C77_2 H77A_2 109.3 . . ?
O32_2 C77_2 H77B_2 109.3 . . ?
O26_2 C77_2 H77B_2 109.3 . . ?
H77A_2 C77_2 H77B_2 107.9 . . ?
C35_2 C81_2 C43_2 109.3(5) . . ?
C35_2 C81_2 C82_2 113.4(4) . . ?
C43_2 C81_2 C82_2 113.2(5) . . ?
C35_2 C81_2 H81_2 106.8 . . ?
C43_2 C81_2 H81_2 106.8 . . ?
C82_2 C81_2 H81_2 106.8 . . ?
C83_2 C82_2 C81_2 113.0(4) . . ?
C83_2 C82_2 H82A_2 109.0 . . ?
C81_2 C82_2 H82A_2 109.0 . . ?
C83_2 C82_2 H82B_2 109.0 . . ?
C81_2 C82_2 H82B_2 109.0 . . ?
H82A_2 C82_2 H82B_2 107.8 . . ?
C82_2 C83_2 C84_2 113.1(4) . . ?
C82_2 C83_2 H83A_2 109.0 . . ?
C84_2 C83_2 H83A_2 109.0 . . ?
C82_2 C83_2 H83B_2 109.0 . . ?
C84_2 C83_2 H83B_2 109.0 . . ?
H83A_2 C83_2 H83B_2 107.8 . . ?
C83_2 C84_2 C85_2 114.7(5) . . ?
C83_2 C84_2 H84A_2 108.6 . . ?
C85_2 C84_2 H84A_2 108.6 . . ?
C83_2 C84_2 H84B_2 108.6 . . ?
C85_2 C84_2 H84B_2 108.6 . . ?
H84A_2 C84_2 H84B_2 107.6 . . ?
C86_2 C85_2 C84_2 113.8(5) . . ?
C86_2 C85_2 H85A_2 108.8 . . ?
C84_2 C85_2 H85A_2 108.8 . . ?
C86_2 C85_2 H85B_2 108.8 . . ?
C84_2 C85_2 H85B_2 108.8 . . ?
H85A_2 C85_2 H85B_2 107.7 . . ?
C85_2 C86_2 H86B_2 109.5 . . ?
C85_2 C86_2 H86E_2 109.5 . . ?
H86B_2 C86_2 H86E_2 109.5 . . ?
C85_2 C86_2 H86F_2 109.5 . . ?
H86B_2 C86_2 H86F_2 109.5 . . ?
H86E_2 C86_2 H86F_2 109.5 . . ?
O36_2 C87_2 O42_2 113.1(5) . . ?
O36_2 C87_2 H87A_2 109.0 . . ?
O42_2 C87_2 H87A_2 109.0 . . ?
O36_2 C87_2 H87B_2 109.0 . . ?
O42_2 C87_2 H87B_2 109.0 . . ?
H87A_2 C87_2 H87B_2 107.8 . . ?
C116_2 N111_2 C112_2 113.8(7) . . ?
C113_2 C112_2 N111_2 120.4(6) . . ?
C113_2 C112_2 H112_2 119.8 . . ?
N111_2 C112_2 H112_2 119.8 . . ?
C112_2 C113_2 C114_2 117.0(5) . . ?
C112_2 C113_2 C11_2 124.1(5) . . ?
C114_2 C113_2 C11_2 118.9(5) . . ?
C115_2 C114_2 C113_2 125.9(7) . . ?
C115_2 C114_2 H114_2 117.0 . . ?
C113_2 C114_2 H114_2 117.0 . . ?
C116_2 C115_2 C114_2 115.6(7) . . ?
C116_2 C115_2 H115_2 122.2 . . ?
C114_2 C115_2 H115_2 122.2 . . ?
C115_2 C116_2 N111_2 127.2(8) . . ?
C115_2 C116_2 H116_2 116.4 . . ?
N111_2 C116_2 H116_2 116.4 . . ?
C122_2 N121_2 C126_2 115.2(5) . . ?
N121_2 C122_2 C123_2 125.8(5) . . ?
N121_2 C122_2 H122_2 117.1 . . ?
C123_2 C122_2 H122_2 117.1 . . ?
C122_2 C123_2 C124_2 115.2(5) . . ?
C122_2 C123_2 C21_2 121.9(5) . . ?
C124_2 C123_2 C21_2 122.8(5) . . ?
C125_2 C124_2 C123_2 120.4(5) . . ?
C125_2 C124_2 H124_2 119.8 . . ?
C123_2 C124_2 H124_2 119.8 . . ?
C124_2 C125_2 C126_2 119.2(5) . . ?
C124_2 C125_2 H125_2 120.4 . . ?
C126_2 C125_2 H125_2 120.4 . . ?
N121_2 C126_2 C125_2 124.1(6) . . ?
N121_2 C126_2 H126_2 117.9 . . ?
C125_2 C126_2 H126_2 117.9 . . ?
C136_2 N131_2 C132_2 109.0(7) . . ?
C133_2 C132_2 N131_2 120.6(7) . . ?
C133_2 C132_2 H132_2 119.7 . . ?
N131_2 C132_2 H132_2 119.7 . . ?
C132_2 C133_2 C134_2 116.7(7) . . ?
C132_2 C133_2 C31_2 123.5(7) . . ?
C134_2 C133_2 C31_2 119.6(6) . . ?
C135_2 C134_2 C133_2 129.4(9) . . ?
C135_2 C134_2 H134_2 115.3 . . ?
C133_2 C134_2 H134_2 115.3 . . ?
C136_2 C135_2 C134_2 109.0(9) . . ?
C136_2 C135_2 H135_2 125.5 . . ?
C134_2 C135_2 H135_2 125.5 . . ?
C135_2 C136_2 N131_2 134.6(10) . . ?
C135_2 C136_2 H136_2 112.7 . . ?
N131_2 C136_2 H136_2 112.7 . . ?
C146_2 N141_2 C142_2 115.3(6) . . ?
C143_2 C142_2 N141_2 121.1(6) . . ?
C143_2 C142_2 H142_2 119.4 . . ?
N141_2 C142_2 H142_2 119.4 . . ?
C144_2 C143_2 C142_2 116.2(6) . . ?
C144_2 C143_2 C41_2 121.3(5) . . ?
C142_2 C143_2 C41_2 122.3(5) . . ?
C145_2 C144_2 C143_2 124.8(6) . . ?
C145_2 C144_2 H144_2 117.6 . . ?
C143_2 C144_2 H144_2 117.6 . . ?
C146_2 C145_2 C144_2 117.6(6) . . ?
C146_2 C145_2 H145_2 121.2 . . ?
C144_2 C145_2 H145_2 121.2 . . ?
C145_2 C146_2 N141_2 124.9(6) . . ?
C145_2 C146_2 H146_2 117.6 . . ?
N141_2 C146_2 H146_2 117.6 . . ?

loop_
 _geom_torsion_atom_site_label_1
 _geom_torsion_atom_site_label_2
 _geom_torsion_atom_site_label_3
 _geom_torsion_atom_site_label_4
 _geom_torsion
 _geom_torsion_site_symmetry_1
 _geom_torsion_site_symmetry_2
 _geom_torsion_site_symmetry_3
 _geom_torsion_site_symmetry_4
 _geom_torsion_publ_flag
C16_1 C11_1 C12_1 C13_1 3.4(8) . . . . ?
C113_1 C11_1 C12_1 C13_1 -173.8(5) . . . . ?
C16_1 C11_1 C12_1 O12_1 -179.3(4) . . . . ?
C113_1 C11_1 C12_1 O12_1 3.5(7) . . . . ?
C13_1 C12_1 O12_1 C57_1 -84.9(6) . . . . ?
C11_1 C12_1 O12_1 C57_1 97.7(5) . . . . ?
C11_1 C12_1 C13_1 C14_1 0.7(8) . . . . ?
O12_1 C12_1 C13_1 C14_1 -176.5(4) . . . . ?
C11_1 C12_1 C13_1 C51_1 -177.1(5) . . . . ?
O12_1 C12_1 C13_1 C51_1 5.7(7) . . . . ?
C12_1 C13_1 C14_1 C15_1 -2.1(7) . . . . ?
C51_1 C13_1 C14_1 C15_1 175.6(4) . . . . ?
C13_1 C14_1 C15_1 C16_1 -0.6(7) . . . . ?
C13_1 C14_1 C15_1 C61_1 178.9(5) . . . . ?
C12_1 C11_1 C16_1 O16_1 176.5(4) . . . . ?
C113_1 C11_1 C16_1 O16_1 -6.4(7) . . . . ?
C12_1 C11_1 C16_1 C15_1 -6.2(7) . . . . ?
C113_1 C11_1 C16_1 C15_1 170.9(5) . . . . ?
C14_1 C15_1 C16_1 O16_1 -177.9(4) . . . . ?
C61_1 C15_1 C16_1 O16_1 2.7(7) . . . . ?
C14_1 C15_1 C16_1 C11_1 4.8(7) . . . . ?
C61_1 C15_1 C16_1 C11_1 -174.6(4) . . . . ?
C11_1 C16_1 O16_1 C67_1 -108.4(5) . . . . ?
C15_1 C16_1 O16_1 C67_1 74.3(6) . . . . ?
C26_1 C21_1 C22_1 C23_1 0.6(9) . . . . ?
C123_1 C21_1 C22_1 C23_1 -179.0(5) . . . . ?
C26_1 C21_1 C22_1 O22_1 -179.2(5) . . . . ?
C123_1 C21_1 C22_1 O22_1 1.1(8) . . . . ?
C23_1 C22_1 O22_1 C67_1 -77.5(6) . . . . ?
C21_1 C22_1 O22_1 C67_1 102.3(6) . . . . ?
C21_1 C22_1 C23_1 C24_1 -1.8(8) . . . . ?
O22_1 C22_1 C23_1 C24_1 178.0(5) . . . . ?
C21_1 C22_1 C23_1 C61_1 -178.5(5) . . . . ?
O22_1 C22_1 C23_1 C61_1 1.3(8) . . . . ?
C22_1 C23_1 C24_1 C25_1 1.3(9) . . . . ?
C61_1 C23_1 C24_1 C25_1 177.9(5) . . . . ?
C23_1 C24_1 C25_1 C26_1 0.4(9) . . . . ?
C23_1 C24_1 C25_1 C71_1 -176.0(5) . . . . ?
C24_1 C25_1 C26_1 O26_1 176.4(5) . . . . ?
C71_1 C25_1 C26_1 O26_1 -7.0(8) . . . . ?
C24_1 C25_1 C26_1 C21_1 -1.7(9) . . . . ?
C71_1 C25_1 C26_1 C21_1 174.9(5) . . . . ?
C22_1 C21_1 C26_1 O26_1 -177.0(5) . . . . ?
C123_1 C21_1 C26_1 O26_1 2.7(9) . . . . ?
C22_1 C21_1 C26_1 C25_1 1.2(9) . . . . ?
C123_1 C21_1 C26_1 C25_1 -179.2(5) . . . . ?
C25_1 C26_1 O26_1 C77_1 81.5(7) . . . . ?
C21_1 C26_1 O26_1 C77_1 -100.3(6) . . . . ?
C36_1 C31_1 C32_1 C33_1 0.9(8) . . . . ?
C133_1 C31_1 C32_1 C33_1 -178.0(5) . . . . ?
C36_1 C31_1 C32_1 O32_1 179.6(4) . . . . ?
C133_1 C31_1 C32_1 O32_1 0.6(8) . . . . ?
C33_1 C32_1 O32_1 C77_1 -82.2(6) . . . . ?
C31_1 C32_1 O32_1 C77_1 99.1(6) . . . . ?
O32_1 C32_1 C33_1 C34_1 -177.4(4) . . . . ?
C31_1 C32_1 C33_1 C34_1 1.3(8) . . . . ?
O32_1 C32_1 C33_1 C71_1 4.6(8) . . . . ?
C31_1 C32_1 C33_1 C71_1 -176.7(5) . . . . ?
C32_1 C33_1 C34_1 C35_1 -1.4(8) . . . . ?
C71_1 C33_1 C34_1 C35_1 176.6(5) . . . . ?
C33_1 C34_1 C35_1 C36_1 -0.6(8) . . . . ?
C33_1 C34_1 C35_1 C81_1 -176.4(5) . . . . ?
C32_1 C31_1 C36_1 C35_1 -3.2(8) . . . . ?
C133_1 C31_1 C36_1 C35_1 175.8(5) . . . . ?
C32_1 C31_1 C36_1 O36_1 176.3(5) . . . . ?
C133_1 C31_1 C36_1 O36_1 -4.7(7) . . . . ?
C34_1 C35_1 C36_1 C31_1 3.0(8) . . . . ?
C81_1 C35_1 C36_1 C31_1 178.9(5) . . . . ?
C34_1 C35_1 C36_1 O36_1 -176.4(4) . . . . ?
C81_1 C35_1 C36_1 O36_1 -0.5(7) . . . . ?
C31_1 C36_1 O36_1 C87_1 -98.0(5) . . . . ?
C35_1 C36_1 O36_1 C87_1 81.5(6) . . . . ?
C46_1 C41_1 C42_1 C43_1 0.2(7) . . . . ?
C143_1 C41_1 C42_1 C43_1 -179.7(5) . . . . ?
C46_1 C41_1 C42_1 O42_1 175.8(4) . . . . ?
C143_1 C41_1 C42_1 O42_1 -4.1(7) . . . . ?
C43_1 C42_1 O42_1 C87_1 -76.3(6) . . . . ?
C41_1 C42_1 O42_1 C87_1 108.0(5) . . . . ?
O42_1 C42_1 C43_1 C44_1 -178.7(4) . . . . ?
C41_1 C42_1 C43_1 C44_1 -3.3(8) . . . . ?
O42_1 C42_1 C43_1 C81_1 1.9(7) . . . . ?
C41_1 C42_1 C43_1 C81_1 177.3(5) . . . . ?
C42_1 C43_1 C44_1 C45_1 3.7(7) . . . . ?
C81_1 C43_1 C44_1 C45_1 -177.0(5) . . . . ?
C43_1 C44_1 C45_1 C46_1 -0.7(8) . . . . ?
C43_1 C44_1 C45_1 C51_1 -176.3(5) . . . . ?
C44_1 C45_1 C46_1 O46_1 173.7(4) . . . . ?
C51_1 C45_1 C46_1 O46_1 -10.6(7) . . . . ?
C44_1 C45_1 C46_1 C41_1 -2.7(7) . . . . ?
C51_1 C45_1 C46_1 C41_1 173.0(4) . . . . ?
C42_1 C41_1 C46_1 C45_1 2.9(7) . . . . ?
C143_1 C41_1 C46_1 C45_1 -177.2(5) . . . . ?
C42_1 C41_1 C46_1 O46_1 -173.6(4) . . . . ?
C143_1 C41_1 C46_1 O46_1 6.3(7) . . . . ?
C45_1 C46_1 O46_1 C57_1 84.4(6) . . . . ?
C41_1 C46_1 O46_1 C57_1 -99.0(5) . . . . ?
C44_1 C45_1 C51_1 C13_1 94.4(6) . . . . ?
C46_1 C45_1 C51_1 C13_1 -81.0(6) . . . . ?
C44_1 C45_1 C51_1 C52_1 -31.6(7) . . . . ?
C46_1 C45_1 C51_1 C52_1 153.0(5) . . . . ?
C12_1 C13_1 C51_1 C45_1 85.8(6) . . . . ?
C14_1 C13_1 C51_1 C45_1 -91.9(6) . . . . ?
C12_1 C13_1 C51_1 C52_1 -146.9(5) . . . . ?
C14_1 C13_1 C51_1 C52_1 35.5(6) . . . . ?
C45_1 C51_1 C52_1 C53_1 -67.7(6) . . . . ?
C13_1 C51_1 C52_1 C53_1 169.4(4) . . . . ?
C51_1 C52_1 C53_1 C54_1 169.7(4) . . . . ?
C52_1 C53_1 C54_1 C55_1 58.6(7) . . . . ?
C53_1 C54_1 C55_1 C56_1 -177.7(5) . . . . ?
C46_1 O46_1 C57_1 O12_1 -88.5(5) . . . . ?
C12_1 O12_1 C57_1 O46_1 91.2(5) . . . . ?
C22_1 C23_1 C61_1 C62_1 -147.0(5) . . . . ?
C24_1 C23_1 C61_1 C62_1 36.5(7) . . . . ?
C22_1 C23_1 C61_1 C15_1 86.3(6) . . . . ?
C24_1 C23_1 C61_1 C15_1 -90.2(6) . . . . ?
C16_1 C15_1 C61_1 C23_1 -90.2(6) . . . . ?
C14_1 C15_1 C61_1 C23_1 90.3(6) . . . . ?
C16_1 C15_1 C61_1 C62_1 142.0(5) . . . . ?
C14_1 C15_1 C61_1 C62_1 -37.4(6) . . . . ?
C23_1 C61_1 C62_1 C63_1 64.5(6) . . . . ?
C15_1 C61_1 C62_1 C63_1 -170.8(4) . . . . ?
C61_1 C62_1 C63_1 C64_1 179.5(5) . . . . ?
C62_1 C63_1 C64_1 C65_1 -178.6(5) . . . . ?
C63_1 C64_1 C65_1 C66_1 70.4(8) . . . . ?
C22_1 O22_1 C67_1 O16_1 96.0(5) . . . . ?
C16_1 O16_1 C67_1 O22_1 -95.4(6) . . . . ?
C24_1 C25_1 C71_1 C33_1 95.0(6) . . . . ?
C26_1 C25_1 C71_1 C33_1 -81.4(6) . . . . ?
C24_1 C25_1 C71_1 C72_1 -30.9(8) . . . . ?
C26_1 C25_1 C71_1 C72_1 152.7(5) . . . . ?
C32_1 C33_1 C71_1 C25_1 85.2(6) . . . . ?
C34_1 C33_1 C71_1 C25_1 -92.8(6) . . . . ?
C32_1 C33_1 C71_1 C72_1 -148.4(5) . . . . ?
C34_1 C33_1 C71_1 C72_1 33.7(7) . . . . ?
C25_1 C71_1 C72_1 C73_1 -65.9(7) . . . . ?
C33_1 C71_1 C72_1 C73_1 169.9(5) . . . . ?
C71_1 C72_1 C73_1 C74_1 179.8(5) . . . . ?
C72_1 C73_1 C74_1 C75_1 -176.9(6) . . . . ?
C73_1 C74_1 C75_1 C76_1 176.3(6) . . . . ?
C26_1 O26_1 C77_1 O32_1 -92.9(6) . . . . ?
C32_1 O32_1 C77_1 O26_1 93.9(6) . . . . ?
C34_1 C35_1 C81_1 C43_1 87.4(6) . . . . ?
C36_1 C35_1 C81_1 C43_1 -88.2(6) . . . . ?
C34_1 C35_1 C81_1 C82_1 -39.1(7) . . . . ?
C36_1 C35_1 C81_1 C82_1 145.3(5) . . . . ?
C44_1 C43_1 C81_1 C35_1 -94.2(6) . . . . ?
C42_1 C43_1 C81_1 C35_1 85.2(6) . . . . ?
C44_1 C43_1 C81_1 C82_1 32.0(7) . . . . ?
C42_1 C43_1 C81_1 C82_1 -148.7(5) . . . . ?
C35_1 C81_1 C82_1 C83_1 -176.5(4) . . . . ?
C43_1 C81_1 C82_1 C83_1 59.9(6) . . . . ?
C81_1 C82_1 C83_1 C84_1 -172.2(4) . . . . ?
C82_1 C83_1 C84_1 C85_1 167.6(5) . . . . ?
C83_1 C84_1 C85_1 C86_1 -171.1(5) . . . . ?
C36_1 O36_1 C87_1 O42_1 -98.7(5) . . . . ?
C42_1 O42_1 C87_1 O36_1 94.7(5) . . . . ?
C116_1 N111_1 C112_1 C113_1 -1.3(9) . . . . ?
N111_1 C112_1 C113_1 C114_1 3.2(9) . . . . ?
N111_1 C112_1 C113_1 C11_1 -174.9(5) . . . . ?
C12_1 C11_1 C113_1 C114_1 -110.5(7) . . . . ?
C16_1 C11_1 C113_1 C114_1 72.5(8) . . . . ?
C12_1 C11_1 C113_1 C112_1 67.5(7) . . . . ?
C16_1 C11_1 C113_1 C112_1 -109.5(6) . . . . ?
C112_1 C113_1 C114_1 C115_1 -2.3(10) . . . . ?
C11_1 C113_1 C114_1 C115_1 175.7(7) . . . . ?
C113_1 C114_1 C115_1 C116_1 -0.8(13) . . . . ?
C114_1 C115_1 C116_1 N111_1 3.0(14) . . . . ?
C112_1 N111_1 C116_1 C115_1 -1.9(12) . . . . ?
C126_1 N121_1 C122_1 C123_1 -0.7(10) . . . . ?
N121_1 C122_1 C123_1 C124_1 -0.3(10) . . . . ?
N121_1 C122_1 C123_1 C21_1 -178.1(6) . . . . ?
C22_1 C21_1 C123_1 C122_1 -114.4(7) . . . . ?
C26_1 C21_1 C123_1 C122_1 66.0(9) . . . . ?
C22_1 C21_1 C123_1 C124_1 68.0(8) . . . . ?
C26_1 C21_1 C123_1 C124_1 -111.7(7) . . . . ?
C122_1 C123_1 C124_1 C125_1 2.2(10) . . . . ?
C21_1 C123_1 C124_1 C125_1 180.0(6) . . . . ?
C123_1 C124_1 C125_1 C126_1 -3.0(11) . . . . ?
C124_1 C125_1 C126_1 N121_1 2.0(11) . . . . ?
C122_1 N121_1 C126_1 C125_1 -0.1(10) . . . . ?
C136_1 N131_1 C132_1 C133_1 1.3(9) . . . . ?
N131_1 C132_1 C133_1 C134_1 0.8(9) . . . . ?
N131_1 C132_1 C133_1 C31_1 176.6(6) . . . . ?
C36_1 C31_1 C133_1 C132_1 -66.7(7) . . . . ?
C32_1 C31_1 C133_1 C132_1 112.3(6) . . . . ?
C36_1 C31_1 C133_1 C134_1 108.8(7) . . . . ?
C32_1 C31_1 C133_1 C134_1 -72.2(8) . . . . ?
C132_1 C133_1 C134_1 C135_1 -3.2(9) . . . . ?
C31_1 C133_1 C134_1 C135_1 -178.8(6) . . . . ?
C133_1 C134_1 C135_1 C136_1 3.5(11) . . . . ?
C132_1 N131_1 C136_1 C135_1 -1.1(10) . . . . ?
C134_1 C135_1 C136_1 N131_1 -1.3(11) . . . . ?
C146_1 N141_1 C142_1 C143_1 0.8(8) . . . . ?
N141_1 C142_1 C143_1 C144_1 -0.9(7) . . . . ?
N141_1 C142_1 C143_1 C41_1 178.0(5) . . . . ?
C42_1 C41_1 C143_1 C142_1 111.1(6) . . . . ?
C46_1 C41_1 C143_1 C142_1 -68.8(6) . . . . ?
C42_1 C41_1 C143_1 C144_1 -70.0(7) . . . . ?
C46_1 C41_1 C143_1 C144_1 110.1(6) . . . . ?
C142_1 C143_1 C144_1 C145_1 0.4(8) . . . . ?
C41_1 C143_1 C144_1 C145_1 -178.6(5) . . . . ?
C143_1 C144_1 C145_1 C146_1 0.3(8) . . . . ?
C144_1 C145_1 C146_1 N141_1 -0.4(9) . . . . ?
C142_1 N141_1 C146_1 C145_1 -0.1(8) . . . . ?
C16_2 C11_2 C12_2 C13_2 -4.1(8) . . . . ?
C113_2 C11_2 C12_2 C13_2 175.7(5) . . . . ?
C16_2 C11_2 C12_2 O12_2 -179.7(4) . . . . ?
C113_2 C11_2 C12_2 O12_2 0.1(8) . . . . ?
C13_2 C12_2 O12_2 C57_2 79.2(6) . . . . ?
C11_2 C12_2 O12_2 C57_2 -105.1(5) . . . . ?
C11_2 C12_2 C13_2 C14_2 1.5(8) . . . . ?
O12_2 C12_2 C13_2 C14_2 176.9(4) . . . . ?
C11_2 C12_2 C13_2 C51_2 -179.7(5) . . . . ?
O12_2 C12_2 C13_2 C51_2 -4.3(7) . . . . ?
C12_2 C13_2 C14_2 C15_2 0.6(7) . . . . ?
C51_2 C13_2 C14_2 C15_2 -178.2(5) . . . . ?
C13_2 C14_2 C15_2 C16_2 0.1(7) . . . . ?
C13_2 C14_2 C15_2 C61_2 176.5(5) . . . . ?
C14_2 C15_2 C16_2 O16_2 178.4(4) . . . . ?
C61_2 C15_2 C16_2 O16_2 2.0(7) . . . . ?
C14_2 C15_2 C16_2 C11_2 -2.9(8) . . . . ?
C61_2 C15_2 C16_2 C11_2 -179.4(5) . . . . ?
C12_2 C11_2 C16_2 C15_2 4.8(8) . . . . ?
C113_2 C11_2 C16_2 C15_2 -175.0(5) . . . . ?
C12_2 C11_2 C16_2 O16_2 -176.5(5) . . . . ?
C113_2 C11_2 C16_2 O16_2 3.7(7) . . . . ?
C15_2 C16_2 O16_2 C67_2 -80.5(6) . . . . ?
C11_2 C16_2 O16_2 C67_2 100.8(5) . . . . ?
C26_2 C21_2 C22_2 C23_2 0.2(7) . . . . ?
C123_2 C21_2 C22_2 C23_2 178.5(5) . . . . ?
C26_2 C21_2 C22_2 O22_2 -176.7(4) . . . . ?
C123_2 C21_2 C22_2 O22_2 1.6(7) . . . . ?
C23_2 C22_2 O22_2 C67_2 76.0(6) . . . . ?
C21_2 C22_2 O22_2 C67_2 -107.0(5) . . . . ?
C21_2 C22_2 C23_2 C24_2 2.5(8) . . . . ?
O22_2 C22_2 C23_2 C24_2 179.3(4) . . . . ?
C21_2 C22_2 C23_2 C61_2 -178.0(5) . . . . ?
O22_2 C22_2 C23_2 C61_2 -1.2(7) . . . . ?
C22_2 C23_2 C24_2 C25_2 -2.9(7) . . . . ?
C61_2 C23_2 C24_2 C25_2 177.7(5) . . . . ?
C23_2 C24_2 C25_2 C26_2 0.3(8) . . . . ?
C23_2 C24_2 C25_2 C71_2 177.1(5) . . . . ?
C24_2 C25_2 C26_2 O26_2 -174.8(4) . . . . ?
C71_2 C25_2 C26_2 O26_2 8.5(7) . . . . ?
C24_2 C25_2 C26_2 C21_2 2.7(7) . . . . ?
C71_2 C25_2 C26_2 C21_2 -174.0(4) . . . . ?
C22_2 C21_2 C26_2 C25_2 -2.9(7) . . . . ?
C123_2 C21_2 C26_2 C25_2 178.8(5) . . . . ?
C22_2 C21_2 C26_2 O26_2 174.6(4) . . . . ?
C123_2 C21_2 C26_2 O26_2 -3.8(7) . . . . ?
C25_2 C26_2 O26_2 C77_2 -84.0(6) . . . . ?
C21_2 C26_2 O26_2 C77_2 98.5(5) . . . . ?
C36_2 C31_2 C32_2 O32_2 -178.3(4) . . . . ?
C133_2 C31_2 C32_2 O32_2 0.8(8) . . . . ?
C36_2 C31_2 C32_2 C33_2 -1.0(8) . . . . ?
C133_2 C31_2 C32_2 C33_2 178.1(5) . . . . ?
C31_2 C32_2 O32_2 C77_2 -95.9(6) . . . . ?
C33_2 C32_2 O32_2 C77_2 86.7(6) . . . . ?
C31_2 C32_2 C33_2 C34_2 -1.8(8) . . . . ?
O32_2 C32_2 C33_2 C34_2 175.4(4) . . . . ?
C31_2 C32_2 C33_2 C71_2 175.2(5) . . . . ?
O32_2 C32_2 C33_2 C71_2 -7.5(7) . . . . ?
C32_2 C33_2 C34_2 C35_2 1.7(7) . . . . ?
C71_2 C33_2 C34_2 C35_2 -175.3(5) . . . . ?
C33_2 C34_2 C35_2 C36_2 1.2(8) . . . . ?
C33_2 C34_2 C35_2 C81_2 179.6(5) . . . . ?
C34_2 C35_2 C36_2 C31_2 -4.3(8) . . . . ?
C81_2 C35_2 C36_2 C31_2 177.3(5) . . . . ?
C34_2 C35_2 C36_2 O36_2 178.2(4) . . . . ?
C81_2 C35_2 C36_2 O36_2 -0.2(8) . . . . ?
C32_2 C31_2 C36_2 C35_2 4.2(8) . . . . ?
C133_2 C31_2 C36_2 C35_2 -174.8(5) . . . . ?
C32_2 C31_2 C36_2 O36_2 -178.2(5) . . . . ?
C133_2 C31_2 C36_2 O36_2 2.7(8) . . . . ?
C35_2 C36_2 O36_2 C87_2 -75.9(6) . . . . ?
C31_2 C36_2 O36_2 C87_2 106.4(6) . . . . ?
C46_2 C41_2 C42_2 C43_2 -2.7(9) . . . . ?
C143_2 C41_2 C42_2 C43_2 174.8(5) . . . . ?
C46_2 C41_2 C42_2 O42_2 179.0(5) . . . . ?
C143_2 C41_2 C42_2 O42_2 -3.5(8) . . . . ?
C43_2 C42_2 O42_2 C87_2 77.5(6) . . . . ?
C41_2 C42_2 O42_2 C87_2 -104.1(6) . . . . ?
C41_2 C42_2 C43_2 C44_2 3.8(8) . . . . ?
O42_2 C42_2 C43_2 C44_2 -177.9(5) . . . . ?
C41_2 C42_2 C43_2 C81_2 -178.3(5) . . . . ?
O42_2 C42_2 C43_2 C81_2 -0.1(8) . . . . ?
C42_2 C43_2 C44_2 C45_2 -1.6(8) . . . . ?
C81_2 C43_2 C44_2 C45_2 -179.4(5) . . . . ?
C43_2 C44_2 C45_2 C46_2 -1.6(9) . . . . ?
C43_2 C44_2 C45_2 C51_2 173.7(5) . . . . ?
C44_2 C45_2 C46_2 O46_2 -177.8(5) . . . . ?
C51_2 C45_2 C46_2 O46_2 6.7(8) . . . . ?
C44_2 C45_2 C46_2 C41_2 2.8(9) . . . . ?
C51_2 C45_2 C46_2 C41_2 -172.7(5) . . . . ?
C42_2 C41_2 C46_2 O46_2 179.9(5) . . . . ?
C143_2 C41_2 C46_2 O46_2 2.4(8) . . . . ?
C42_2 C41_2 C46_2 C45_2 -0.8(9) . . . . ?
C143_2 C41_2 C46_2 C45_2 -178.2(5) . . . . ?
C45_2 C46_2 O46_2 C57_2 -85.0(7) . . . . ?
C41_2 C46_2 O46_2 C57_2 94.4(6) . . . . ?
C14_2 C13_2 C51_2 C45_2 93.8(6) . . . . ?
C12_2 C13_2 C51_2 C45_2 -85.0(6) . . . . ?
C14_2 C13_2 C51_2 C52_2 -33.3(6) . . . . ?
C12_2 C13_2 C51_2 C52_2 147.9(5) . . . . ?
C44_2 C45_2 C51_2 C13_2 -91.4(6) . . . . ?
C46_2 C45_2 C51_2 C13_2 83.9(6) . . . . ?
C44_2 C45_2 C51_2 C52_2 34.9(8) . . . . ?
C46_2 C45_2 C51_2 C52_2 -149.9(5) . . . . ?
C13_2 C51_2 C52_2 C53_2 -172.9(5) . . . . ?
C45_2 C51_2 C52_2 C53_2 62.8(6) . . . . ?
C51_2 C52_2 C53_2 C54_2 176.1(5) . . . . ?
C52_2 C53_2 C54_2 C55_2 176.1(5) . . . . ?
C53_2 C54_2 C55_2 C56_2 -177.4(6) . . . . ?
C46_2 O46_2 C57_2 O12_2 95.5(5) . . . . ?
C12_2 O12_2 C57_2 O46_2 -91.9(5) . . . . ?
C14_2 C15_2 C61_2 C23_2 -89.6(6) . . . . ?
C16_2 C15_2 C61_2 C23_2 86.6(6) . . . . ?
C14_2 C15_2 C61_2 C62_2 36.9(6) . . . . ?
C16_2 C15_2 C61_2 C62_2 -146.8(5) . . . . ?
C22_2 C23_2 C61_2 C15_2 -86.1(6) . . . . ?
C24_2 C23_2 C61_2 C15_2 93.4(6) . . . . ?
C22_2 C23_2 C61_2 C62_2 147.2(5) . . . . ?
C24_2 C23_2 C61_2 C62_2 -33.4(6) . . . . ?
C15_2 C61_2 C62_2 C63_2 176.0(4) . . . . ?
C23_2 C61_2 C62_2 C63_2 -59.8(5) . . . . ?
C61_2 C62_2 C63_2 C64_2 178.1(4) . . . . ?
C62_2 C63_2 C64_2 C65_2 -169.6(5) . . . . ?
C63_2 C64_2 C65_2 C66_2 170.3(5) . . . . ?
C16_2 O16_2 C67_2 O22_2 96.4(5) . . . . ?
C22_2 O22_2 C67_2 O16_2 -93.1(5) . . . . ?
C32_2 C33_2 C71_2 C72_2 149.9(5) . . . . ?
C34_2 C33_2 C71_2 C72_2 -33.1(7) . . . . ?
C32_2 C33_2 C71_2 C25_2 -81.8(6) . . . . ?
C34_2 C33_2 C71_2 C25_2 95.1(6) . . . . ?
C26_2 C25_2 C71_2 C33_2 81.8(6) . . . . ?
C24_2 C25_2 C71_2 C33_2 -94.9(6) . . . . ?
C26_2 C25_2 C71_2 C72_2 -151.5(5) . . . . ?
C24_2 C25_2 C71_2 C72_2 31.9(7) . . . . ?
C33_2 C71_2 C72_2 C73_2 -170.0(5) . . . . ?
C25_2 C71_2 C72_2 C73_2 66.5(6) . . . . ?
C71_2 C72_2 C73_2 C74_2 -165.2(5) . . . . ?
C72_2 C73_2 C74_2 C75_2 -58.4(7) . . . . ?
C73_2 C74_2 C75_2 C76_2 -179.5(6) . . . . ?
C32_2 O32_2 C77_2 O26_2 -91.9(5) . . . . ?
C26_2 O26_2 C77_2 O32_2 88.7(5) . . . . ?
C36_2 C35_2 C81_2 C43_2 88.0(6) . . . . ?
C34_2 C35_2 C81_2 C43_2 -90.3(6) . . . . ?
C36_2 C35_2 C81_2 C82_2 -144.6(5) . . . . ?
C34_2 C35_2 C81_2 C82_2 37.1(7) . . . . ?
C42_2 C43_2 C81_2 C35_2 -87.6(6) . . . . ?
C44_2 C43_2 C81_2 C35_2 90.1(6) . . . . ?
C42_2 C43_2 C81_2 C82_2 144.9(5) . . . . ?
C44_2 C43_2 C81_2 C82_2 -37.4(7) . . . . ?
C35_2 C81_2 C82_2 C83_2 173.4(4) . . . . ?
C43_2 C81_2 C82_2 C83_2 -61.2(6) . . . . ?
C81_2 C82_2 C83_2 C84_2 -177.7(4) . . . . ?
C82_2 C83_2 C84_2 C85_2 -177.3(5) . . . . ?
C83_2 C84_2 C85_2 C86_2 -65.0(7) . . . . ?
C36_2 O36_2 C87_2 O42_2 97.3(5) . . . . ?
C42_2 O42_2 C87_2 O36_2 -98.7(5) . . . . ?
C116_2 N111_2 C112_2 C113_2 0.0(11) . . . . ?
N111_2 C112_2 C113_2 C114_2 -1.7(10) . . . . ?
N111_2 C112_2 C113_2 C11_2 -178.4(6) . . . . ?
C12_2 C11_2 C113_2 C112_2 57.2(9) . . . . ?
C16_2 C11_2 C113_2 C112_2 -123.0(7) . . . . ?
C12_2 C11_2 C113_2 C114_2 -119.4(6) . . . . ?
C16_2 C11_2 C113_2 C114_2 60.4(8) . . . . ?
C112_2 C113_2 C114_2 C115_2 3.0(10) . . . . ?
C11_2 C113_2 C114_2 C115_2 179.9(6) . . . . ?
C113_2 C114_2 C115_2 C116_2 -2.2(12) . . . . ?
C114_2 C115_2 C116_2 N111_2 0.2(14) . . . . ?
C112_2 N111_2 C116_2 C115_2 0.9(14) . . . . ?
C126_2 N121_2 C122_2 C123_2 -1.1(8) . . . . ?
N121_2 C122_2 C123_2 C124_2 1.4(8) . . . . ?
N121_2 C122_2 C123_2 C21_2 179.6(5) . . . . ?
C22_2 C21_2 C123_2 C122_2 70.6(7) . . . . ?
C26_2 C21_2 C123_2 C122_2 -111.2(6) . . . . ?
C22_2 C21_2 C123_2 C124_2 -111.4(6) . . . . ?
C26_2 C21_2 C123_2 C124_2 66.8(6) . . . . ?
C122_2 C123_2 C124_2 C125_2 -0.1(7) . . . . ?
C21_2 C123_2 C124_2 C125_2 -178.2(5) . . . . ?
C123_2 C124_2 C125_2 C126_2 -1.5(8) . . . . ?
C122_2 N121_2 C126_2 C125_2 -0.7(8) . . . . ?
C124_2 C125_2 C126_2 N121_2 2.0(8) . . . . ?
C136_2 N131_2 C132_2 C133_2 -2.3(11) . . . . ?
N131_2 C132_2 C133_2 C134_2 -1.3(10) . . . . ?
N131_2 C132_2 C133_2 C31_2 173.3(6) . . . . ?
C32_2 C31_2 C133_2 C132_2 -74.9(8) . . . . ?
C36_2 C31_2 C133_2 C132_2 104.1(8) . . . . ?
C32_2 C31_2 C133_2 C134_2 99.5(7) . . . . ?
C36_2 C31_2 C133_2 C134_2 -81.5(8) . . . . ?
C132_2 C133_2 C134_2 C135_2 -0.4(13) . . . . ?
C31_2 C133_2 C134_2 C135_2 -175.3(8) . . . . ?
C133_2 C134_2 C135_2 C136_2 5.8(14) . . . . ?
C134_2 C135_2 C136_2 N131_2 -11.6(18) . . . . ?
C132_2 N131_2 C136_2 C135_2 10.2(17) . . . . ?
C146_2 N141_2 C142_2 C143_2 -0.9(9) . . . . ?
N141_2 C142_2 C143_2 C144_2 0.1(9) . . . . ?
N141_2 C142_2 C143_2 C41_2 174.9(5) . . . . ?
C42_2 C41_2 C143_2 C144_2 68.5(8) . . . . ?
C46_2 C41_2 C143_2 C144_2 -114.1(7) . . . . ?
C42_2 C41_2 C143_2 C142_2 -106.0(7) . . . . ?
C46_2 C41_2 C143_2 C142_2 71.4(8) . . . . ?
C142_2 C143_2 C144_2 C145_2 2.1(10) . . . . ?
C41_2 C143_2 C144_2 C145_2 -172.8(6) . . . . ?
C143_2 C144_2 C145_2 C146_2 -3.3(11) . . . . ?
C144_2 C145_2 C146_2 N141_2 2.5(11) . . . . ?
C142_2 N141_2 C146_2 C145_2 -0.5(11) . . . . ?

_diffrn_measured_fraction_theta_max    0.899
_diffrn_reflns_theta_full              26.48
_diffrn_measured_fraction_theta_full   0.899
_refine_diff_density_max    0.605
_refine_diff_density_min   -0.528
_refine_diff_density_rms    0.077

#END
